# Supplementary material for: DFT study on the ruthenium-catalyzed decarbonylative annulation of an alkyne with a six-membered hydroxychromone via C–H/C–C activation
Source: Royal Society of Chemistry journal article supplement (doi:10.1039/d1qo01786a), 2021-12-23
Supplement: d1qo01786a1.pdf [file d1qo01786a1.pdf]

# DFT study on ruthenium-catalyzed decarbonylative annulation of an alkyne with six-membered hydroxymone via C–H/C–C activation

Hong-Jing Long<sup>a</sup>, Lei Zhang<sup>b</sup>, Bing Lian<sup>a</sup>, and De-Cai Fang<sup>a\*</sup>

<sup>a</sup> College of Chemistry, Beijing Normal University, Beijing 100875, China

Email: [dcfang@bnu.edu.cn](mailto:dcfang@bnu.edu.cn)

<sup>b</sup> Tianjin Engineering Technology Center of Chemical Wastewater Source Reduction and Recycling, School of Science, Tianjin Chengjian University, Tianjin 300384, P. R. China

1. Discussion from the steady-state approximation

..... s1-s2

2. Discussion from the ESM considering the concentration of intermediate **INT-4**

..... s2-s5

**Table S1.** The calculated total electronic energies, enthalpies, entropies and free energies in a.u. , in the tert-butanol solvent with the temperature of 358.15K

..... s5-s7

**Table S2** Coordinates of All Stationary Points Computed at B3LYP-D3a+IDSCRF/ TZP-DKH(-dfg) level in tert-butanol

..... s7-s35

**Table S3** Frequencies of all stationary points for the overall catalytic cycle, computed at B3LYP-D3a+IDSCRF/TZP-DKH(-dfg) level in tert-butanol solution

..... s36-s48

## 1. Discussion from the steady-state approximation

Since the free-energy of **INT-4** is about 9.2 kcal·mol<sup>-1</sup> above the **1a+CAT**, the formation rate of **INT-4** is much smaller than the consumption rate of **INT-4**, and thus the steady-state approximation seems not valid at the point of **INT-4**. For such case, the whole reaction of **1a+2a+CAT**→**3a** could be separated into two reaction processes of **1a+CAT**→**INT-4** and **INT-4+2a**→**3a**, within each of which the steady-state approximation should be valid.

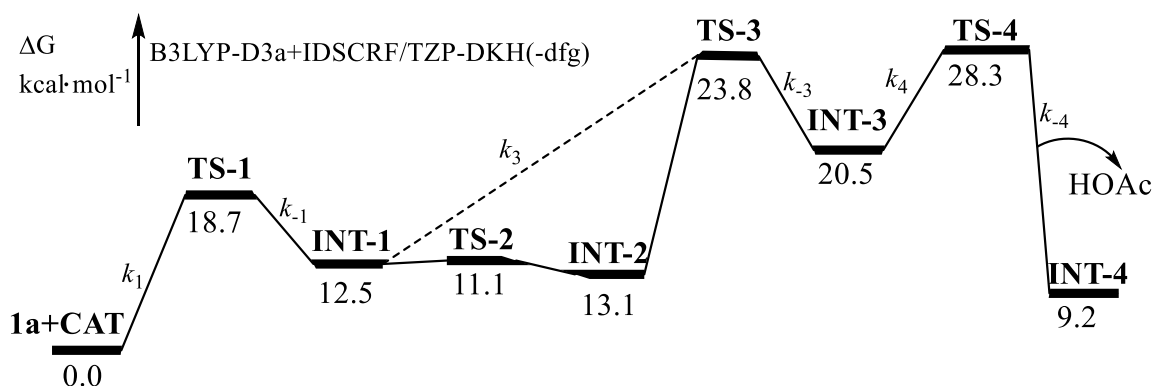

**Figure S1** The free-energy profile(358.15K) for calculating the formation rate of **INT-4** from **1a+CAT**

$$\frac{d[1a][CAT]}{dt} = -k_1[1a][CAT] + k_{-1}[INT-1] \quad (1)$$

$$\frac{d[INT-1]}{dt} = k_1[1a][CAT] - k_{-1}[INT-1] - k_3[INT-1] + k_{-3}[INT-3] \quad (2)$$

$$\frac{d[INT-3]}{dt} = k_3[INT-1] - k_{-3}[INT-3] - k_4[INT-3] \quad (3)$$

$$\frac{d[INT-4]}{dt} = -\frac{d[1a][CAT]}{dt} = k_4[INT-3] \quad (4)$$

Since  $k_{-4} \ll k_4$ , one could ignore the term  $k_{-4}[INT-4][HOAc]$  in the equations (3) and (4). According to the steady-state approximation, one can deduce:

$$[INT-3]_{SSA} = \frac{k_3}{k_{-3}+k_4} [INT-1] \quad \text{and} \quad [INT-1]_{SSA} = \frac{k_1}{k_{-1}+k_3-\frac{k_{-3}k_3}{k_{-3}k_4}} [1a][CAT]$$

Thus:

$$k^{1st} = \frac{k_1 k_3 k_4}{k_{-1} k_{-3} + k_{-1} k_4 + k_3 k_4} \quad (5)$$

Since the free energy of **TS-4** is much higher than those of **TS-3** and **TS-1**, i.e.,  $k_3$  is much smaller than others, allowing for omission of the 2<sup>nd</sup> and 3<sup>rd</sup> denominator terms in eq. (5), leading

to:

$$k^{1st} \approx \frac{k_1 k_3 k_4}{k_{-1} k_{-3}} \quad (6)$$

From transition state theory, one can obtain:

$$k^{1st} \approx \frac{k_B T}{h} e^{-\frac{(G^{TS-4} - G^{1a+CAT})}{RT}} \quad (7)$$

Substitute  $k_1=2.898 \times 10^1 \text{ s}^{-1} \text{ dm}^3 \text{ mol}^{-1}$ ,  $k_{-1}=1.229 \times 10^9 \text{ s}^{-1}$ ,  $k_3=9.496 \times 10^5 \text{ s}^{-1}$ ,  $k_{-3}=7.231 \times 10^{10} \text{ s}^{-1}$ ,  $k_4=1.298 \times 10^8 \text{ s}^{-1}$  and  $k_{-4}=1.652 \times 10^1 \text{ s}^{-1} \text{ dm}^3 \text{ mol}^{-1}$  into equation (5), one can deduce:  $k^{1st}=4.01 \times 10^{-5} \text{ s}^{-1} \text{ dm}^3 \text{ mol}^{-1}$ , almost the same as  $k^{1st}=4.02 \times 10^{-5} \text{ s}^{-1} \text{ dm}^3 \text{ mol}^{-1}$  from equation (7).

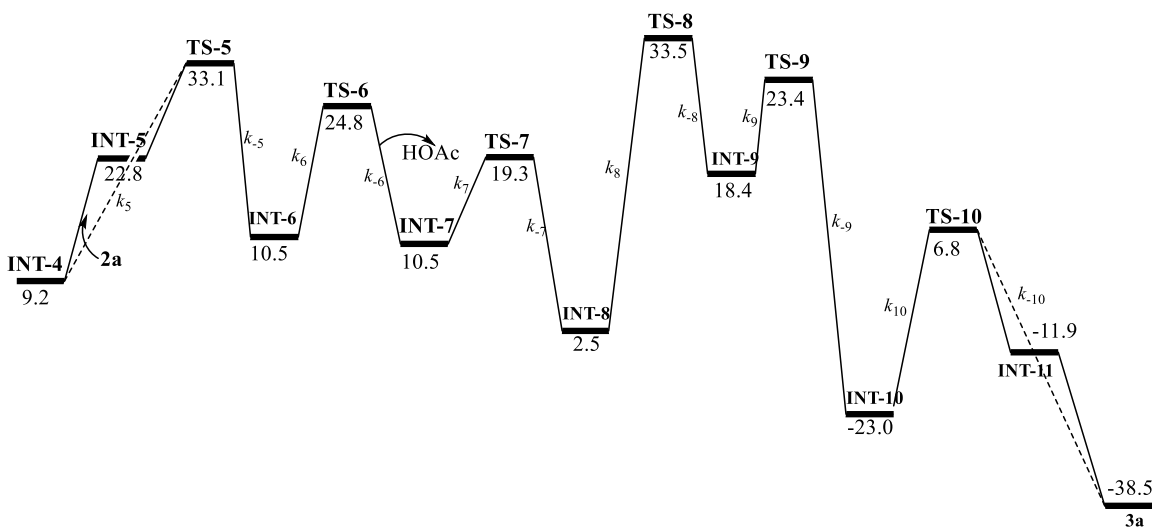

**Figure S2** The free-energy profile(358.15K) for calculating the formation rate of **3a** from **INT-4**

According to steady-state approximation, the  $k^{sec}$  should be calculated as equation (8):

$$k^{sec} = \frac{k_5 k_6 k_7 k_8 k_9}{k_{-5} k_{-6} k_{-7} k_{-8} + k_{-5} k_{-6} k_{-7} k_9 + k_{-5} k_{-6} k_8 k_9 + k_{-5} k_7 k_8 k_9 + k_6 k_7 k_8 k_9} \quad (8)$$

The calculated rate  $k^{sec}$  is  $7.06 \times 10^{-3} \text{ s}^{-1} \text{ dm}^3 \text{ mol}^{-1}$ , which is close to that from the following equation ( $k^{sec}=1.11 \times 10^{-2} \text{ s}^{-1} \text{ dm}^3 \text{ mol}^{-1}$ ):

$$k^{sec} \approx \frac{k_B T}{h} e^{-\frac{(G^{TS-8} - G^{INT-4})}{RT}} \quad (9)$$

The difference might originate from the contributions of both **TS-5** and **TS-8** for equation (8). Since  $k^{1st}=4.02 \times 10^{-5} \text{ s}^{-1} \cdot \text{dm}^3 \cdot \text{mol}^{-1}$  is much smaller than  $k^{sec}=7.06 \times 10^{-3} \text{ s}^{-1} \cdot \text{dm}^3 \cdot \text{mol}^{-1}$ , **TS-4** and initial states should be the TOF-determining transition states (TDTS) and TOF-determining intermediate(TDI) if the energy span model (ESM) introduced by Kozuch and Shaik was employed(see next section).

## 2. Discussion from the ESM considering the concentration of intermediate INT-4

The turnover frequency (TOF) of the catalytic cycle is defined by Kozuch and Shaik(S. Kozuch, S. Shaik, *J Am Chem Soc* 2006, **128**, 3355):

$$\text{TOF} = \frac{k_B T}{h} \frac{e^{-\Delta G^r} - 1}{\sum_{ij} e^{\frac{(T_i - I_j - \delta G'_{i,j})}{RT}}} \quad (10)$$

Here  $\Delta G^r$  is the energy of the global reaction.  $T_i$  and  $I_j$  are the calculated free energies of each transition state and intermediate, respectively.  $\delta G'_{i,j}$  is either  $\Delta G^r$  or zero, according to the position of  $T_i$  vs.  $I_j$  in the specific term of the summation, specified in eq. (11):

$$\delta G'_{i,j} = \begin{cases} \Delta G^r & \text{if } i > j \\ 0.0 & \text{if } i \leq j \end{cases} \quad (12)$$

To identify the TDI and TDTS, the energetic span model offers a quantification of the influence of each intermediate and transition state on the TOF—the so-called “degree of TOF control” ( $X_{\text{TOF}}$ ) (S. Kozuch, S. Shaik, *J Am Chem Soc* 2006, **128**, 3355). The  $X_{\text{TOF}}$  was developed based on Campbell’s degree of rate control((a) C. T. Campbell, *Topics Catal* 1994, **1**, 353; (b) C. T. Campbell, *J Catal* 2001, **204**, 520; (c) C. Stegelmann, A. Andreasen, C.T. Campbell, *J Am Chem Soc* 2009, **131**, 8077; (d) C. Stegelmann, A. Andreasen, C.T. Campbell, *J Am Chem Soc* 2009, **131**, 13563; (e) J. K. Nørskov, T. Bligaard, J. Kleis, *Science* 2009, **324**, 1655) and measures how much will the TOF vary by a small change on a TS or an intermediate energy. It is calculated according to eq. (12) for transition states and eq. (13) for intermediates:

$$X_{\text{TOF},T_i} = \frac{\sum_j e^{\frac{(T_i - I_j - \delta G'_{i,j})}{RT}}}{\sum_{ij} e^{\frac{(T_i - I_j - \delta G'_{i,j})}{RT}}} \quad (12)$$

$$X_{\text{TOF},I_j} = \frac{\sum_i e^{\frac{(T_i - I_j - \delta G'_{i,j})}{RT}}}{\sum_{ij} e^{\frac{(T_i - I_j - \delta G'_{i,j})}{RT}}} \quad (13)$$

with

$$\delta G'_{i,j} = \begin{cases} \Delta G^r & \text{if } i \geq j \\ 0 & \text{if } i < j \end{cases} \quad (14)$$

If the rate constant of the formation of the last intermediate(*int*) for the reaction of first reactant is smaller than that of the consuming of the *int*, meaning that the formed *int* could react with **2a** quickly and then this int could not go back to reactants. In such case, the reaction with second reactant could start with this intermediate and the formation of *int* could be the rate-controlling step.

$$TOF = k_i[C_i] - k_{-i}[C_{i+1}] = \frac{\Delta}{M} \quad (15)$$

$$\delta G'_{i,j} = \begin{cases} \Delta G^r + \Delta G_k^{int} & \text{if } i \geq k, j < k \\ \Delta G_k^{int} & \text{if } i < k \text{ and } j \geq k \end{cases} \quad (16)$$

Herein  $\Delta G_k^{int}$  is the free-energy relative to the the lowest free-energy species before the last intermediate  $k$  in the first reaction process between catalyst and first reactant. For example, if one has the following free-energy profile curve, one can assume **INT-2** is the initial state for the reaction of second reactant.

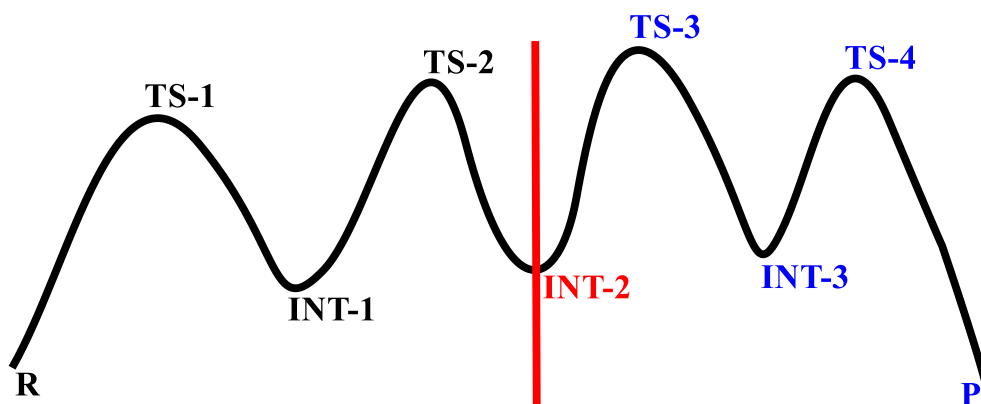

**Figure S3** The supposed free-energy profile, herein the **INT-2** is last intermediate for the reaction of first reactant with catalyst.

For the stationary points within each part, the equation (14) is employed, e.g.,  $\mathbf{R} \rightarrow \mathbf{TS-1} \rightarrow \mathbf{INT-1} \rightarrow \mathbf{TS-2}$  and  $\mathbf{INT-2} \rightarrow \mathbf{TS-3} \rightarrow \mathbf{INT-3} \rightarrow \mathbf{TS-4}$ . However, for the cross terms between two parts (separated by red line in **Figure S3**) in eqs. (12) and (13), the equation (16) should be employed.

Determining TDI should be careful, since equations (12) and (13) sometime find not-real TDI. If  $C_0 \rightleftharpoons C_1 \rightleftharpoons C_2 \cdots \rightleftharpoons C_{n-1} \rightleftharpoons C_n$  is met, and then any intermediate could be TDI. However, if  $C_0 C_1 \rightarrow C_2$ ,  $C_1$  could not be regarded as TDI even if  $C_1$  is lower in free-energy than  $C_0$  (see **Figure S4**), which is not the same as that from equations (13) and (14). Therefore, one should identify such

intermediates carefully, and then delete the contribution of each such intermediate for the forward direction to the following TS in equation (13).

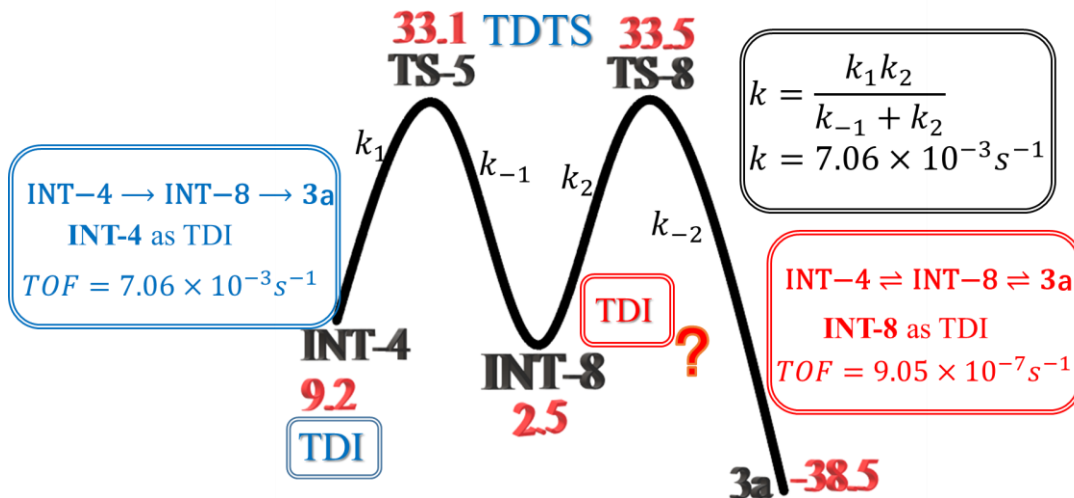

**Figure S4** A simple example to illustrate that  $\text{INT-8}$  is not a TDI for the case of  $\text{INT-4} \rightarrow \text{INT-8} \rightarrow 3a$

If one can find TDTS and TDI from eqs. (12)-(16), the TOF could be shortened to

$$\text{TOF} = \frac{k_B T}{h} e^{-\delta E / RT} \quad (17)$$

$$\delta E = \begin{cases} G^{\text{TDTS}} - G^{\text{TDI}} & \text{if TDTS appears after TDI} \\ G^{\text{TDTS}} - G^{\text{TDI}} + \Delta G^r & \text{if TDTS appears before TDI} \end{cases} \quad (18)$$

**Table S1** The calculated total electronic energies, enthalpies, entropies and free energies in a.u. , in the tert-butanol solvent with the temperature of 358.15K.

| Species   | $E_{\text{elec/a.u.}}$  | $H/\text{a.u.}$ | $S_g$ | $S_l$ | $G_g/\text{a.u.}$ | $G_l/\text{a.u.}$ |
|-----------|-------------------------|-----------------|-------|-------|-------------------|-------------------|
| <b>1a</b> | -803.63621 <sup>a</sup> | -803.40382      | 126.5 | 104.0 | -803.47603        | -803.46318        |
|           | -803.60968 <sup>b</sup> | -803.37725      | 128.5 | 106.0 | -803.45059        | -803.43774        |
|           | -803.56427 <sup>c</sup> | -803.33202      | 127.5 | 105.0 | -803.40481        | -803.39196        |
| <b>2a</b> | -539.69719 <sup>a</sup> | -539.48952      | 113.1 | 90.8  | -539.55406        | -539.54133        |
|           | -539.67412 <sup>b</sup> | -539.46754      | 108.0 | 85.7  | -539.52918        | -539.51645        |
|           | -539.63967 <sup>c</sup> | -539.43208      | 114.8 | 92.5  | -539.49761        | -539.48489        |

|                   |                          |             |       |       |             |             |
|-------------------|--------------------------|-------------|-------|-------|-------------|-------------|
| <b>HOAc</b>       | -229.19616 <sup>a</sup>  | -229.12816  | 72.4  | 52.6  | -229.16936  | -229.15816  |
|                   | -229.18700 <sup>b</sup>  | -229.11897  | 72.2  | 52.8  | -229.16028  | -229.14908  |
|                   | -229.18205 <sup>c</sup>  | -229.11404  | 72.2  | 52.6  | -229.15523  | -229.14403  |
| <b>CAT</b>        | -5247.98764 <sup>a</sup> | -5247.63932 | 174.2 | 152.3 | -5247.73911 | -5247.72659 |
|                   | -5247.96470 <sup>b</sup> | -5247.61629 | 174.3 | 152.4 | -5247.71579 | -5247.70328 |
|                   | -5247.90532 <sup>c</sup> | -5247.55725 | 176.2 | 154.3 | -5247.65779 | -5247.64530 |
| <b>1a+CAT</b>     | -6051.62385 <sup>a</sup> | -6051.04314 | 301.3 | 256.9 | -6051.21514 | -6051.18977 |
|                   | -6051.57438 <sup>b</sup> | -6050.99354 | 302.8 | 258.4 | -6051.16638 | -6051.14102 |
|                   | -6051.46959 <sup>c</sup> | -6050.88927 | 303.7 | 259.3 | -6051.06260 | -6051.03726 |
| <b>TS-1</b>       | -6051.60962 <sup>a</sup> | -6051.02745 | 253.7 | 232.3 | -6051.17224 | -6051.16003 |
|                   | -6051.57234 <sup>b</sup> | -6050.99003 | 252.5 | 231.1 | -6051.13417 | -6051.12196 |
| <b>INT-1</b>      | -6051.62084 <sup>a</sup> | -6051.03911 | 250.6 | 229.2 | -6051.18214 | -6051.16991 |
|                   | -6051.58362 <sup>b</sup> | -6051.00180 | 250.8 | 229.4 | -6051.14494 | -6051.13271 |
| <b>TS-2</b>       | -6051.62029 <sup>a</sup> | -6051.04173 | 249.9 | 228.5 | -6051.18437 | -6051.17212 |
|                   | -6051.58309 <sup>b</sup> | -6051.00441 | 249.0 | 227.5 | -6051.14652 | -6051.13428 |
| <b>INT-2</b>      | -6051.62095 <sup>a</sup> | -6051.03889 | 259.3 | 227.8 | -6051.18115 | -6051.16892 |
|                   | -6051.58377 <sup>b</sup> | -6051.00161 | 250.1 | 228.6 | -6051.14434 | -6051.13211 |
| <b>TS-3</b>       | -6051.59958 <sup>a</sup> | -6051.01755 | 256.6 | 235.2 | -6051.16400 | -6051.15181 |
|                   | -6051.56282 <sup>b</sup> | -6050.98073 | 256.8 | 235.5 | -6051.12729 | -6051.11516 |
| <b>INT-3</b>      | -6051.60404 <sup>a</sup> | -6051.02129 | 258.7 | 237.4 | -6051.16892 | -6051.15676 |
|                   | -6051.54963 <sup>b</sup> | -6050.96952 | 297.9 | 256.8 | -6051.13955 | -6051.11608 |
| <b>TS-4</b>       | -6051.58900 <sup>a</sup> | -6051.01190 | 254.0 | 232.7 | -6051.15687 | -6051.14469 |
|                   | -6051.55114 <sup>b</sup> | -6050.97389 | 253.2 | 231.8 | -6051.11839 | -6051.10621 |
|                   | -6051.42679 <sup>c</sup> | -6050.85011 | 257.1 | 236.0 | -6050.99687 | -6050.98481 |
| <b>INT-4</b>      | -5822.41337 <sup>a</sup> | -5821.90273 | 221.6 | 200.2 | -5822.02923 | -5822.01701 |
|                   | -5822.37793 <sup>b</sup> | -5821.86717 | 222.6 | 201.2 | -5821.99422 | -5821.98201 |
| <b>INT-4+HOAc</b> | -6051.60953 <sup>a</sup> | -6051.03089 | 294.0 | 252.8 | -6051.19859 | -6051.17517 |
|                   | -6051.56493 <sup>b</sup> | -6050.98614 | 294.8 | 254.0 | -6051.15450 | -6051.13109 |
| <b>INT-4+2a</b>   | -6362.11056 <sup>a</sup> | -6361.39225 | 334.7 | 291.0 | -6361.58329 | -6361.55834 |
|                   | -6362.05205 <sup>b</sup> | -6361.29925 | 330.6 | 286.9 | -6361.52340 | -6361.49846 |
| <b>INT-5</b>      | -6362.10406 <sup>a</sup> | -6361.38137 | 293.0 | 272.0 | -6361.54858 | -6361.53663 |
|                   | -6362.05899 <sup>b</sup> | -6361.33772 | 289.2 | 268.2 | -6361.50276 | -6361.49081 |
| <b>TS-5</b>       | -6362.08667 <sup>a</sup> | -6361.36631 | 290.7 | 269.8 | -6361.53221 | -6361.52027 |
|                   | -6362.04162 <sup>b</sup> | -6361.32115 | 291.2 | 270.3 | -6361.48738 | -6361.47545 |
|                   | -6361.87204 <sup>c</sup> | -6361.15234 | 295.7 | 274.8 | -6361.32110 | -6361.30919 |
| <b>INT-6</b>      | -6362.12618 <sup>a</sup> | -6361.40320 | 289.2 | 268.3 | -6361.56824 | -6361.55631 |
|                   | -6362.08156 <sup>b</sup> | -6361.35846 | 290.3 | 269.4 | -6361.52416 | -6361.51223 |
| <b>TS-6</b>       | -6362.10053 <sup>a</sup> | -6361.37985 | 290.2 | 269.2 | -6361.54548 | -6361.53348 |
|                   | -6362.05560 <sup>b</sup> | -6361.33480 | 289.7 | 268.7 | -6361.50014 | -6361.48815 |
| <b>INT-7+HOAc</b> | -6362.11490 <sup>a</sup> | -6361.39470 | 323.9 | 283.0 | -6361.57946 | -6361.55619 |

|                                         |                          |             |       |       |             |             |
|-----------------------------------------|--------------------------|-------------|-------|-------|-------------|-------------|
|                                         | -6362.06251 <sup>b</sup> | -6361.34214 | 324.9 | 284.4 | -6361.52768 | -6361.50441 |
| <b>INT-7</b>                            | -6132.91874 <sup>a</sup> | -6132.26654 | 251.5 | 230.4 | -6132.41010 | -6132.39803 |
|                                         | -6132.87551 <sup>b</sup> | -6132.22317 | 252.7 | 231.6 | -6132.36740 | -6132.35533 |
| <b>TS-7</b>                             | -6132.90257 <sup>a</sup> | -6132.25213 | 246.5 | 225.3 | -6132.39284 | -6132.38071 |
|                                         | -6132.85941 <sup>b</sup> | -6132.20888 | 251.0 | 229.7 | -6132.35213 | -6132.34000 |
| <b>INT-8</b>                            | -6132.93300 <sup>a</sup> | -6132.28066 | 249.2 | 227.9 | -6132.42289 | -6132.41074 |
|                                         | -6132.89023 <sup>b</sup> | -6132.23769 | 247.2 | 225.9 | -6132.37880 | -6132.36664 |
| <b>TS-8</b>                             | -6132.87921 <sup>a</sup> | -6132.22930 | 252.7 | 231.4 | -6132.37353 | -6132.36137 |
|                                         | -6132.83709 <sup>b</sup> | -6132.18705 | 251.8 | 230.5 | -6132.33076 | -6132.31861 |
| <b>TS-8a</b>                            | -6132.87328 <sup>a</sup> | -6132.22337 | 246.9 | 225.6 | -6132.36429 | -6132.35211 |
|                                         | -6132.83064 <sup>b</sup> | -6132.18057 | 246.8 | 225.4 | -6132.32141 | -6132.30924 |
| <b>INT-9</b>                            | -6132.90793              | -6132.25586 | 248.4 | 227.0 | -6132.39763 | -6132.38541 |
|                                         | -6132.86529              | -6132.21309 | 248.7 | 227.3 | -6132.35504 | -6132.34282 |
| <b>TS-9</b>                             | -6132.89687 <sup>a</sup> | -6132.24730 | 249.4 | 228.1 | -6132.38967 | -6132.37748 |
|                                         | -6132.85371 <sup>b</sup> | -6132.20402 | 252.2 | 230.8 | -6132.33576 | -6132.34795 |
| <b>INT-10</b>                           | -6132.97006 <sup>a</sup> | -6132.31729 | 256.4 | 235.1 | -6132.46364 | -6132.45149 |
|                                         | -6132.90437 <sup>b</sup> | -6132.25296 | 257.1 | 235.8 | -6132.39022 | -6132.40226 |
| <b>TS-10</b>                            | -6132.91755 <sup>a</sup> | -6132.26864 | 258.1 | 237.0 | -6132.41595 | -6132.40388 |
|                                         | -6132.87448 <sup>b</sup> | -6132.22545 | 258.9 | 237.8 | -6132.37324 | -6132.36117 |
| <b>INT-11</b>                           | -6132.94778 <sup>a</sup> | -6132.29653 | 261.6 | 240.5 | -6132.44583 | -6132.43379 |
|                                         | -6132.90437 <sup>b</sup> | -6132.25296 | 261.6 | 240.5 | -6132.40226 | -6132.39022 |
| <b><sup>3</sup>O<sub>2</sub></b>        | -150.37899 <sup>a</sup>  | -150.37134  | 50.3  | 34.7  | -150.40004  | -150.39112  |
|                                         | -150.37353 <sup>b</sup>  | -150.36587  | 50.3  | 34.7  | -150.39457  | -150.38568  |
| <b><sup>1</sup>O<sub>2</sub>(o)</b>     | -150.36265 <sup>a</sup>  | -150.35501  | 48.1  | 32.5  | -150.38246  | -150.37357  |
|                                         | -150.35751 <sup>b</sup>  | -150.34986  | 48.1  | 32.5  | -150.37732  | -150.36843  |
| <b>INT-11+<sup>3</sup>O<sub>2</sub></b> | -6283.32677 <sup>a</sup> | -6282.66787 | 311.9 | 275.2 | -6282.84587 | -6282.82491 |
|                                         | -6283.27790 <sup>b</sup> | -6282.61883 | 311.9 | 275.2 | -6282.79683 | -6282.77590 |
| <b>SP</b>                               | -6283.32463 <sup>a</sup> |             |       |       |             |             |
|                                         | -6283.27619 <sup>b</sup> |             |       |       |             |             |
| <b>3a</b>                               | -1228.78439 <sup>a</sup> | -1228.37677 | 178.2 | 156.6 | -1228.47846 | -1228.46615 |
|                                         | -1228.74831 <sup>b</sup> | -1228.34059 | 179.4 | 157.9 | -1228.44301 | -1228.43069 |
| <b><sup>3</sup>pre-CAT</b>              | -5054.55701 <sup>a</sup> | -5054.30617 | 149.0 | 126.3 | -5054.39122 | -5054.37826 |
|                                         | -5054.53660 <sup>b</sup> | -5054.28570 | 149.6 | 126.9 | -5054.37105 | -5054.35810 |
| <b><sup>1</sup>pre-CAT</b>              | -5054.58451 <sup>a</sup> | -5054.33290 | 141.9 | 119.3 | -5054.41389 | -5054.40097 |
|                                         | -5054.56415 <sup>b</sup> | -5054.31249 | 142.1 | 119.3 | -5054.39351 | -5054.38058 |
| <b>3a+<sup>3</sup>pre-CAT</b>           | -6283.34140 <sup>a</sup> | -6282.68294 | 327.2 | 282.9 | -6282.86968 | -6282.84441 |
|                                         | -6283.28491 <sup>b</sup> | -6282.62629 | 329.0 | 284.8 | -6282.81406 | -6282.78879 |
| <b>3a+<sup>1</sup>pre-CAT</b>           | -6283.36890 <sup>a</sup> | -6282.70967 | 322.1 | 275.9 | -6282.89235 | -6282.86712 |
|                                         | -6283.31246 <sup>b</sup> | -6282.65308 | 321.5 | 277.2 | -6282.83652 | -6282.81127 |
| <b><sup>1</sup>pre-CAT+</b>             | -5283.78067 <sup>a</sup> | -5283.46106 | 214.3 | 171.9 | -5283.58325 | -5283.55913 |



|                                                      |                          |             |       |       |             |             |
|------------------------------------------------------|--------------------------|-------------|-------|-------|-------------|-------------|
| <b>HOAc</b>                                          | -5283.75115 <sup>b</sup> | -5283.43146 | 214.3 | 172.1 | -5283.55379 | -5283.52966 |
| <b>TS-1c</b>                                         | -5283.77243 <sup>a</sup> | -5283.45258 | 173.1 | 150.9 | -5283.55139 | -5283.53873 |
|                                                      | -5283.74859 <sup>b</sup> | -5283.42866 | 174.5 | 152.3 | -5283.52826 | -5283.51560 |
| <b>INT-1c</b>                                        | -5283.79255 <sup>a</sup> | -5283.47001 | 174.5 | 152.3 | -5283.56958 | -5283.55693 |
|                                                      | -5283.76890 <sup>b</sup> | -5283.44628 | 175.2 | 153.1 | -5283.54629 | -5283.53364 |
| <b><sup>1</sup>pre-CAT+<br/>2HOAc</b>                | -5512.97683 <sup>a</sup> | -5512.58922 | 286.7 | 224.5 | -5512.75261 | -5512.71729 |
|                                                      | -5512.93815 <sup>b</sup> | -5512.55043 | 286.5 | 224.9 | -5512.71407 | -5512.67874 |
| <b>TS-2c</b>                                         | -5512.97048 <sup>a</sup> | -5512.57895 | 200.7 | 178.8 | -5512.69353 | -5512.68102 |
|                                                      | -5512.94450 <sup>b</sup> | -5512.55287 | 202.9 | 180.9 | -5512.66865 | -5512.65614 |
| <b>INT-2c</b>                                        | -5513.00395 <sup>a</sup> | -5512.60969 | 208.8 | 186.9 | -5512.72887 | -5512.71635 |
|                                                      | -5512.97447 <sup>b</sup> | -5512.58031 | 207.3 | 185.3 | -5512.69861 | -5512.68606 |
| <b>INT-3c</b>                                        | -5361.36702 <sup>a</sup> | -5361.00711 | 189.4 | 167.5 | -5361.11520 | -5361.10269 |
|                                                      | -5361.34818 <sup>b</sup> | -5360.98845 | 191.8 | 170.0 | -5361.09793 | -5361.08546 |
| <b>H<sub>2</sub>O<sub>2</sub></b>                    | -151.62578 <sup>a</sup>  | -151.59518  | 56.3  | 40.2  | -151.62730  | -151.61812  |
|                                                      | -151.61873 <sup>b</sup>  | -151.58809  | 56.3  | 40.2  | -151.62023  | -151.61104  |
| <b>INT-3c+H<sub>2</sub>O<sub>2</sub></b>             | -5512.99280 <sup>a</sup> | -5512.60229 | 245.7 | 207.7 | -5512.74250 | -5512.72081 |
|                                                      | -5512.96691 <sup>b</sup> | -5512.57654 | 248.0 | 210.2 | -5512.71816 | -5512.69650 |
| <b>CO</b>                                            | -113.35827 <sup>a</sup>  | -113.34928  | 48.5  | 32.5  | -113.37694  | -113.36782  |
|                                                      | -113.35374 <sup>b</sup>  | -113.34474  | 48.5  | 32.5  | -113.37241  | -113.36329  |
| <b>TS-3c</b>                                         | -5361.32888 <sup>a</sup> | -5360.97099 | 192.9 | 170.0 | -5361.08110 | -5361.06860 |
|                                                      | -5361.30585 <sup>b</sup> | -5360.94774 | 191.9 | 170.0 | -5361.05728 | -5361.04478 |
| <b>CAT+CO<sup>g</sup>+H<sub>2</sub>O<sub>2</sub></b> | -5512.97169 <sup>a</sup> | -5512.58378 | 279.0 | 225.0 | -5512.74335 | -5512.72165 |
|                                                      | -5512.93717              | -5512.54912 | 279.1 | 225.1 | -5512.70843 | -5512.68673 |

- a) B3LYP-D3a+IDSCRF/TZP-DKH(-dfg); b) B3LYP-D3+IDSCRF/TZP-DKH(-dfg); c)  
B3LYP+IDSCRF/TZP-DKH(-dfg)

**Table S2** Coordinates of All Stationary Points Computed at B3LYP-D3a+IDSCRF/ TZP-DKH(-dfg) level in tert-butanol

| <b>1a</b> |         |          |          | <b>2a</b> |         |          |          |
|-----------|---------|----------|----------|-----------|---------|----------|----------|
| C         | 2.25365 | 0.34754  | -0.00698 | C         | 0.00000 | 0.00000  | 0.60432  |
| C         | 3.65823 | 0.34524  | -0.01067 | C         | 0.00000 | 0.00000  | -0.60432 |
| C         | 1.57920 | -0.87465 | 0.05979  | C         | 0.00000 | 0.00000  | 2.02730  |
| C         | 4.35186 | -0.84283 | 0.05121  | C         | 0.00000 | 1.20881  | 2.74100  |
| C         | 2.27462 | -2.08304 | 0.12310  | C         | 0.00000 | -1.20881 | 2.74100  |
| C         | 3.65440 | -2.05883 | 0.11797  | C         | 0.00000 | 1.20389  | 4.12779  |
| H         | 4.17217 | 1.29651  | -0.06386 | C         | 0.00000 | -1.20389 | 4.12779  |
| H         | 5.43483 | -0.84287 | 0.04820  | C         | 0.00000 | 0.00000  | 4.82612  |
| H         | 1.72116 | -3.01220 | 0.17479  | H         | 0.00000 | 2.14519  | 2.19690  |
| H         | 4.20291 | -2.99199 | 0.16620  | H         | 0.00000 | -2.14519 | 2.19690  |

|           |          |          |          |            |          |          |          |
|-----------|----------|----------|----------|------------|----------|----------|----------|
| C         | 1.47500  | 1.57038  | -0.07539 | H          | 0.00000  | 2.14407  | 4.66688  |
| O         | 1.95164  | 2.71304  | -0.15186 | H          | 0.00000  | -2.14407 | 4.66688  |
| C         | 0.03263  | 1.40473  | -0.06041 | H          | 0.00000  | 0.00000  | 5.90969  |
| C         | -0.55382 | 0.17413  | 0.01099  | C          | 0.00000  | 0.00000  | -2.02730 |
| O         | 0.22537  | -0.94573 | 0.07074  | C          | 0.00000  | -1.20881 | -2.74100 |
| O         | -0.68313 | 2.54905  | -0.14424 | C          | 0.00000  | 1.20881  | -2.74100 |
| H         | -0.01705 | 3.27010  | -0.20174 | C          | 0.00000  | -1.20389 | -4.12779 |
| C         | -1.98412 | -0.14254 | 0.01079  | C          | 0.00000  | 1.20389  | -4.12779 |
| C         | -2.40583 | -1.44112 | -0.31475 | C          | 0.00000  | 0.00000  | -4.82612 |
| C         | -2.95424 | 0.81608  | 0.33877  | H          | 0.00000  | -2.14519 | -2.19690 |
| C         | -3.75350 | -1.76555 | -0.31987 | H          | 0.00000  | 2.14519  | -2.19690 |
| C         | -4.30044 | 0.47963  | 0.33880  | H          | 0.00000  | -2.14407 | -4.66688 |
| C         | -4.70781 | -0.80759 | 0.00702  | H          | 0.00000  | 2.14407  | -4.66688 |
| H         | -1.67325 | -2.19361 | -0.57039 | H          | 0.00000  | 0.00000  | -5.90969 |
| H         | -2.65418 | 1.81798  | 0.60169  |            |          |          |          |
| H         | -4.06004 | -2.77161 | -0.58108 |            |          |          |          |
| H         | -5.03586 | 1.23070  | 0.60236  |            |          |          |          |
| H         | -5.76080 | -1.06339 | 0.00459  |            |          |          |          |
| <b>3a</b> |          |          |          | <b>CAT</b> |          |          |          |
| C         | -3.03348 | 0.14151  | 0.70471  | C          | -0.08163 | -2.03700 | 1.32554  |
| C         | -4.20372 | -0.16766 | 1.39912  | C          | -0.72834 | -0.88083 | 1.83493  |
| C         | -3.01436 | 0.16267  | -0.68784 | C          | -0.37426 | -2.45468 | -0.00033 |
| C         | -5.34279 | -0.45261 | 0.66728  | C          | -1.61896 | -0.13961 | 1.02348  |
| C         | -4.14693 | -0.12248 | -1.43833 | C          | -1.23693 | -1.68330 | -0.80313 |
| C         | -5.30522 | -0.42813 | -0.73555 | C          | -1.88167 | -0.50698 | -0.31509 |
| H         | -4.20710 | -0.18217 | 2.48256  | H          | -0.46766 | -0.50414 | 2.81223  |
| H         | -6.26900 | -0.69686 | 1.17204  | H          | 0.14408  | -3.30179 | -0.42729 |
| H         | -4.12300 | -0.10490 | -2.52046 | H          | -1.99160 | 0.79541  | 1.41024  |
| H         | -6.20856 | -0.65531 | -1.29006 | H          | -1.34688 | -1.94175 | -1.84916 |
| C         | -1.69506 | 0.47198  | 1.16718  | C          | 0.93198  | -2.76726 | 2.14816  |
| O         | -1.25950 | 0.55938  | 2.29439  | H          | 1.70537  | -3.20642 | 1.51884  |
| O         | -1.80404 | 0.47541  | -1.21937 | H          | 1.40328  | -2.10060 | 2.86968  |
| C         | 1.48119  | 0.55841  | -0.12746 | H          | 0.44321  | -3.57491 | 2.70073  |
| C         | -0.86501 | 0.70848  | -0.13389 | C          | -2.77894 | 0.29476  | -1.22941 |
| C         | 0.35871  | -0.19952 | -0.17613 | H          | -2.42604 | 0.10777  | -2.24864 |
| C         | 1.89999  | 3.13489  | -0.15526 | C          | -2.71217 | 1.80250  | -0.98328 |
| C         | 1.11599  | 1.98955  | -0.13465 | C          | -4.21985 | -0.22482 | -1.12167 |
| C         | 1.26539  | 4.37663  | -0.22592 | H          | -4.27769 | -1.29404 | -1.33509 |
| H         | 1.86363  | 5.28016  | -0.24490 | H          | -4.61565 | -0.05870 | -0.11651 |
| C         | -0.27883 | 2.09580  | -0.18408 | H          | -4.86571 | 0.29774  | -1.83000 |
| C         | -0.12121 | 4.47143  | -0.28047 | H          | -3.12708 | 2.07254  | -0.00965 |

|      |          |          |          |                |          |          |          |
|------|----------|----------|----------|----------------|----------|----------|----------|
| H    | -0.59290 | 5.44481  | -0.34198 | H              | -3.29865 | 2.32497  | -1.74101 |
| C    | -0.91162 | 3.31802  | -0.25807 | H              | -1.68496 | 2.16545  | -1.03102 |
| H    | -1.99219 | 3.39017  | -0.30497 | Ru             | 0.29913  | -0.34845 | -0.02989 |
| H    | 2.98033  | 3.07388  | -0.12596 | O              | 1.36907  | -0.09046 | -1.90212 |
| C    | 0.24357  | -1.66376 | -0.09849 | C              | 2.48360  | -0.21819 | -1.30744 |
| C    | -0.59852 | -2.37399 | -0.96302 | O              | 2.46324  | -0.52975 | -0.07646 |
| C    | 0.96437  | -2.37903 | 0.86647  | C              | 3.77330  | 0.02174  | -2.02532 |
| C    | -0.70594 | -3.75614 | -0.87086 | H              | 4.02323  | 1.08255  | -1.94603 |
| C    | 0.85372  | -3.75897 | 0.95750  | H              | 3.67326  | -0.22700 | -3.08059 |
| C    | 0.01897  | -4.45413 | 0.08803  | H              | 4.57666  | -0.55490 | -1.57017 |
| H    | -1.15341 | -1.84281 | -1.72384 | O              | 0.78591  | 1.66176  | 0.08527  |
| H    | 1.60547  | -1.84309 | 1.55403  | C              | 0.55589  | 2.44647  | 1.09194  |
| H    | -1.35611 | -4.28935 | -1.55481 | O              | 0.06397  | 2.11858  | 2.17105  |
| H    | 1.41580  | -4.29337 | 1.71470  | C              | 0.95166  | 3.88787  | 0.82019  |
| H    | -0.06731 | -5.53204 | 0.15977  | H              | 0.28968  | 4.30680  | 0.05887  |
| C    | 2.87489  | 0.08070  | -0.11089 | H              | 1.96792  | 3.93649  | 0.42741  |
| C    | 3.32537  | -0.84039 | -1.06159 | H              | 0.87396  | 4.48103  | 1.72884  |
| C    | 3.77533  | 0.54740  | 0.85212  |                |          |          |          |
| C    | 4.63951  | -1.28718 | -1.04570 |                |          |          |          |
| C    | 5.08765  | 0.09166  | 0.87301  |                |          |          |          |
| C    | 5.52455  | -0.82545 | -0.07654 |                |          |          |          |
| H    | 2.63964  | -1.20078 | -1.81811 |                |          |          |          |
| H    | 3.43949  | 1.25421  | 1.60137  |                |          |          |          |
| H    | 4.97465  | -1.99672 | -1.79337 |                |          |          |          |
| H    | 5.76994  | 0.45422  | 1.63313  |                |          |          |          |
| H    | 6.54973  | -1.17653 | -0.06336 |                |          |          |          |
| HOAc |          |          |          | O <sub>2</sub> |          |          |          |
| H    | 1.88166  | 0.41195  | 0.00000  | O              | 0.00000  | 0.00000  | 0.60436  |
| O    | 1.25230  | -0.34235 | 0.00000  | O              | 0.00000  | 0.00000  | -0.60436 |
| O    | -0.23584 | 1.33814  | 0.00000  |                |          |          |          |
| C    | 0.00000  | 0.15154  | 0.00000  |                |          |          |          |
| C    | -1.03122 | -0.93938 | 0.00000  |                |          |          |          |
| H    | -0.89921 | -1.57240 | 0.87943  |                |          |          |          |
| H    | -2.02765 | -0.50644 | 0.00000  |                |          |          |          |
| H    | -0.89921 | -1.57240 | -0.87943 |                |          |          |          |

|                                   |          |          |          |              |          |          |          |
|-----------------------------------|----------|----------|----------|--------------|----------|----------|----------|
| <b>H<sub>2</sub>O<sub>2</sub></b> |          |          |          | <b>CO</b>    |          |          |          |
| O                                 | 0.00000  | 0.72622  | -0.06695 | C            | 0.00000  | 0.00000  | -0.64304 |
| O                                 | 0.00000  | -0.72622 | -0.06695 | O            | 0.00000  | 0.00000  | 0.48228  |
| H                                 | -0.74614 | -0.91923 | 0.53561  |              |          |          |          |
| H                                 | 0.74614  | 0.91923  | 0.53561  |              |          |          |          |
| <b>TS-1</b>                       |          |          |          | <b>INT-1</b> |          |          |          |
| C                                 | -3.76999 | -0.43819 | -0.87373 | C            | -3.63776 | -0.46080 | -0.86006 |
| C                                 | -4.74875 | -1.44211 | -0.93937 | C            | -4.71682 | -1.35627 | -0.89862 |
| C                                 | -3.98818 | 0.65276  | -0.02996 | C            | -3.87752 | 0.84891  | -0.44460 |
| C                                 | -5.89535 | -1.35182 | -0.18163 | C            | -5.98139 | -0.94621 | -0.53401 |
| C                                 | -5.14454 | 0.75221  | 0.74491  | C            | -5.15120 | 1.27647  | -0.07203 |
| C                                 | -6.08943 | -0.25038 | 0.66530  | C            | -6.19624 | 0.37535  | -0.11878 |
| H                                 | -4.57107 | -2.28486 | -1.59509 | H            | -4.52341 | -2.37235 | -1.21776 |
| H                                 | -6.64739 | -2.12943 | -0.23493 | H            | -6.81054 | -1.64233 | -0.56642 |
| H                                 | -5.27713 | 1.61054  | 1.39152  | H            | -5.29586 | 2.30208  | 0.24377  |
| H                                 | -6.98997 | -0.18251 | 1.26408  | H            | -7.19035 | 0.69652  | 0.16871  |
| C                                 | -2.53188 | -0.51577 | -1.64240 | C            | -2.27686 | -0.88628 | -1.20632 |
| O                                 | -2.23350 | -1.46447 | -2.37623 | O            | -2.00533 | -2.02381 | -1.58832 |
| C                                 | -1.63296 | 0.61590  | -1.47698 | C            | -1.26883 | 0.15239  | -1.04753 |
| C                                 | -1.92757 | 1.64202  | -0.63118 | C            | -1.60708 | 1.42277  | -0.70626 |
| O                                 | -3.09258 | 1.66655  | 0.07448  | O            | -2.88078 | 1.77518  | -0.39553 |
| O                                 | -0.47290 | 0.60798  | -2.17340 | O            | 0.05232  | -0.15171 | -1.20603 |
| H                                 | -0.20586 | -0.32524 | -2.30736 | H            | 0.27338  | -0.98638 | -1.83264 |
| C                                 | -1.06096 | 2.78310  | -0.32277 | C            | -0.67168 | 2.55025  | -0.59011 |
| C                                 | -1.02916 | 3.28879  | 0.98298  | C            | -0.66996 | 3.34054  | 0.56162  |
| C                                 | -0.24373 | 3.36689  | -1.29779 | C            | 0.20716  | 2.84979  | -1.63348 |
| C                                 | -0.18260 | 4.33850  | 1.30815  | C            | 0.21237  | 4.40706  | 0.67141  |
| C                                 | 0.59334  | 4.42435  | -0.96775 | C            | 1.07692  | 3.92636  | -1.52547 |
| C                                 | 0.63283  | 4.90915  | 0.33548  | C            | 1.08646  | 4.70289  | -0.37049 |
| H                                 | -1.65077 | 2.83615  | 1.74355  | H            | -1.33921 | 3.09487  | 1.37508  |
| H                                 | -0.26707 | 2.99434  | -2.31114 | H            | 0.19973  | 2.24164  | -2.52849 |
| H                                 | -0.15631 | 4.71052  | 2.32563  | H            | 0.22012  | 5.00782  | 1.57322  |
| H                                 | 1.21566  | 4.87253  | -1.73317 | H            | 1.74873  | 4.15939  | -2.34292 |
| H                                 | 1.29256  | 5.72979  | 0.59155  | H            | 1.77118  | 5.53830  | -0.28372 |
| C                                 | 2.34370  | -0.46453 | 2.47898  | C            | 2.15502  | -0.50444 | 2.55089  |

|    |          |          |          |    |          |          |          |
|----|----------|----------|----------|----|----------|----------|----------|
| C  | 3.40555  | -1.03849 | 1.74016  | C  | 2.97154  | -1.34302 | 1.76576  |
| C  | 1.66063  | 0.63783  | 1.89080  | C  | 1.81043  | 0.78041  | 2.02757  |
| C  | 3.78806  | -0.54329 | 0.46387  | C  | 3.44355  | -0.92456 | 0.48558  |
| C  | 2.00054  | 1.10387  | 0.61401  | C  | 2.25337  | 1.16572  | 0.75661  |
| C  | 3.06519  | 0.50845  | -0.13356 | C  | 3.08652  | 0.32334  | -0.04893 |
| H  | 3.89130  | -1.92812 | 2.12156  | H  | 3.18332  | -2.34804 | 2.10430  |
| H  | 0.77674  | 1.02256  | 2.37241  | H  | 1.10858  | 1.40123  | 2.56049  |
| H  | 4.56064  | -1.06007 | -0.08435 | H  | 3.99015  | -1.63510 | -0.11615 |
| H  | 1.39523  | 1.86805  | 0.15172  | H  | 1.89486  | 2.09421  | 0.34094  |
| C  | 1.92527  | -1.01141 | 3.80851  | C  | 1.61804  | -0.96239 | 3.86932  |
| H  | 0.84767  | -0.91744 | 3.93487  | H  | 0.62274  | -0.55625 | 4.03880  |
| H  | 2.20406  | -2.06089 | 3.90541  | H  | 1.57619  | -2.04993 | 3.91959  |
| H  | 2.41480  | -0.45686 | 4.61445  | H  | 2.27274  | -0.61003 | 4.67191  |
| C  | 3.33822  | 1.02064  | -1.52807 | C  | 3.50953  | 0.80413  | -1.41811 |
| H  | 2.35976  | 1.23431  | -1.96758 | H  | 2.62707  | 1.27164  | -1.86268 |
| C  | 4.05451  | 0.02142  | -2.43319 | C  | 3.97414  | -0.30798 | -2.35479 |
| C  | 4.11579  | 2.34263  | -1.43234 | C  | 4.58743  | 1.88763  | -1.26467 |
| H  | 3.58398  | 3.07865  | -0.82739 | H  | 4.24441  | 2.71201  | -0.63705 |
| H  | 5.10024  | 2.18145  | -0.98580 | H  | 5.49216  | 1.47213  | -0.81354 |
| H  | 4.26126  | 2.76504  | -2.42837 | H  | 4.85292  | 2.29551  | -2.24182 |
| H  | 5.07343  | -0.17680 | -2.09184 | H  | 4.89454  | -0.77743 | -1.99836 |
| H  | 4.12527  | 0.42776  | -3.44351 | H  | 4.18668  | 0.11031  | -3.34021 |
| H  | 3.51351  | -0.92345 | -2.48629 | H  | 3.20905  | -1.07551 | -2.47381 |
| Ru | 1.64447  | -1.06575 | 0.47164  | Ru | 1.24473  | -0.78640 | 0.56194  |
| O  | 1.79077  | -3.11842 | -0.24044 | O  | 1.11258  | -2.73308 | -0.29908 |
| C  | 1.25247  | -2.81160 | -1.34554 | C  | 1.04269  | -2.97555 | -1.54383 |
| O  | 1.03333  | -1.57846 | -1.56498 | O  | 0.87467  | -2.10677 | -2.43867 |
| C  | 0.89719  | -3.85691 | -2.35205 | C  | 1.15395  | -4.41996 | -1.96158 |
| H  | 0.28693  | -4.62607 | -1.87759 | H  | 0.15488  | -4.77919 | -2.21926 |
| H  | 1.80842  | -4.33619 | -2.71595 | H  | 1.55732  | -5.03754 | -1.16251 |
| H  | 0.35689  | -3.41600 | -3.18598 | H  | 1.77291  | -4.50004 | -2.85508 |
| O  | -0.26872 | -1.76991 | 0.85123  | O  | -0.60852 | -1.35578 | 1.32509  |
| C  | -1.18916 | -1.30159 | 1.63439  | C  | -1.39168 | -0.65266 | 2.08002  |
| O  | -1.14337 | -0.24656 | 2.26677  | O  | -1.18397 | 0.49521  | 2.47640  |
| C  | -2.39365 | -2.21933 | 1.75445  | C  | -2.65531 | -1.38989 | 2.48903  |
| H  | -2.18521 | -2.95466 | 2.53672  | H  | -2.46044 | -1.91497 | 3.42823  |
| H  | -2.57383 | -2.75982 | 0.82773  | H  | -2.94595 | -2.12739 | 1.74378  |
| H  | -3.27674 | -1.65239 | 2.04129  | H  | -3.46440 | -0.68143 | 2.65844  |

| TS-2 |          |          |          | INT-2 |          |          |          |
|------|----------|----------|----------|-------|----------|----------|----------|
| C    | -3.61342 | -0.43227 | -0.85693 | C     | -3.59012 | -0.45464 | -0.86895 |
| C    | -4.69598 | -1.32441 | -0.88779 | C     | -4.66657 | -1.35482 | -0.90314 |
| C    | -3.85029 | 0.88241  | -0.45579 | C     | -3.84059 | 0.86111  | -0.47844 |
| C    | -5.96009 | -0.90733 | -0.53004 | C     | -5.93675 | -0.94602 | -0.55821 |
| C    | -5.12435 | 1.31767  | -0.09128 | C     | -5.12200 | 1.28808  | -0.12719 |
| C    | -6.17212 | 0.41963  | -0.13010 | C     | -6.16246 | 0.38207  | -0.16838 |
| H    | -4.50477 | -2.34441 | -1.19552 | H     | -4.46503 | -2.37519 | -1.20302 |
| H    | -6.79106 | -1.60162 | -0.55598 | H     | -6.76197 | -1.64711 | -0.58620 |
| H    | -5.26648 | 2.34709  | 0.21322  | H     | -5.27473 | 2.31842  | 0.16908  |
| H    | -7.16583 | 0.74690  | 0.15196  | H     | -7.16095 | 0.70337  | 0.10355  |
| C    | -2.25339 | -0.86629 | -1.19715 | C     | -2.22469 | -0.87846 | -1.19711 |
| O    | -1.99382 | -2.00928 | -1.57397 | O     | -1.95835 | -2.02042 | -1.57745 |
| C    | -1.23210 | 0.16417  | -1.03883 | C     | -1.20062 | 0.15244  | -1.02780 |
| C    | -1.57504 | 1.43964  | -0.71119 | C     | -1.56559 | 1.42982  | -0.71745 |
| O    | -2.85127 | 1.80383  | -0.41310 | O     | -2.85082 | 1.78905  | -0.43582 |
| O    | 0.07633  | -0.14987 | -1.19599 | O     | 0.09349  | -0.16486 | -1.18424 |
| H    | 0.35553  | -1.07047 | -1.89351 | H     | 0.45081  | -1.27857 | -1.98853 |
| C    | -0.63609 | 2.56376  | -0.59202 | C     | -0.64085 | 2.56567  | -0.60426 |
| C    | -0.64101 | 3.36079  | 0.55516  | C     | -0.66015 | 3.37890  | 0.53147  |
| C    | 0.25715  | 2.85263  | -1.62629 | C     | 0.25646  | 2.85092  | -1.63625 |
| C    | 0.24841  | 4.42106  | 0.67047  | C     | 0.21847  | 4.44930  | 0.63835  |
| C    | 1.13425  | 3.92272  | -1.51357 | C     | 1.12271  | 3.93070  | -1.53296 |
| C    | 1.13725  | 4.70483  | -0.36218 | C     | 1.11151  | 4.72813  | -0.39201 |
| H    | -1.32241 | 3.12572  | 1.36183  | H     | -1.34464 | 3.14858  | 1.33698  |
| H    | 0.25589  | 2.23893  | -2.51736 | H     | 0.26727  | 2.22387  | -2.51779 |
| H    | 0.25017  | 5.02625  | 1.56939  | H     | 0.20861  | 5.06641  | 1.52914  |
| H    | 1.81740  | 4.14640  | -2.32428 | H     | 1.80901  | 4.14982  | -2.34232 |
| H    | 1.82776  | 5.53504  | -0.27137 | H     | 1.79365  | 5.56593  | -0.30779 |
| C    | 2.12432  | -0.54429 | 2.56540  | C     | 2.11789  | -0.49376 | 2.57281  |
| C    | 2.94030  | -1.38168 | 1.78130  | C     | 2.93742  | -1.33685 | 1.80212  |
| C    | 1.78789  | 0.74474  | 2.04548  | C     | 1.76719  | 0.78170  | 2.02739  |
| C    | 3.42003  | -0.95750 | 0.50551  | C     | 3.40571  | -0.93243 | 0.51519  |
| C    | 2.24728  | 1.14044  | 0.78272  | C     | 2.22668  | 1.16451  | 0.75980  |
| C    | 3.08120  | 0.29912  | -0.02183 | C     | 3.06304  | 0.31518  | -0.03229 |
| H    | 3.14563  | -2.38985 | 2.11462  | H     | 3.15308  | -2.33723 | 2.15221  |
| H    | 1.08394  | 1.36491  | 2.57636  | H     | 1.05788  | 1.40464  | 2.54784  |
| H    | 3.96570  | -1.66789 | -0.09754 | H     | 3.95408  | -1.65008 | -0.07704 |
| H    | 1.89876  | 2.07510  | 0.37262  | H     | 1.87305  | 2.09114  | 0.33720  |
| C    | 1.57485  | -1.00652 | 3.87729  | C     | 1.57624  | -0.93354 | 3.89579  |
| H    | 0.57924  | -0.59828 | 4.03966  | H     | 0.57329  | -0.53914 | 4.04735  |

|             |          |          |          |              |          |          |          |
|-------------|----------|----------|----------|--------------|----------|----------|----------|
| H           | 1.52940  | -2.09416 | 3.92228  | H            | 1.54975  | -2.02043 | 3.96732  |
| H           | 2.22310  | -0.65949 | 4.68740  | H            | 2.21684  | -0.55532 | 4.69799  |
| C           | 3.52239  | 0.78825  | -1.38209 | C            | 3.49561  | 0.78297  | -1.40293 |
| H           | 2.64846  | 1.26724  | -1.83082 | H            | 2.61081  | 1.23057  | -1.86253 |
| C           | 3.98694  | -0.31923 | -2.32423 | C            | 3.98669  | -0.33458 | -2.31946 |
| C           | 4.60874  | 1.86011  | -1.20868 | C            | 4.55767  | 1.88245  | -1.25569 |
| H           | 4.26634  | 2.68215  | -0.57776 | H            | 4.19632  | 2.71164  | -0.64524 |
| H           | 5.50487  | 1.43263  | -0.75159 | H            | 5.46289  | 1.48656  | -0.78810 |
| H           | 4.88825  | 2.27394  | -2.17944 | H            | 4.82869  | 2.27886  | -2.23612 |
| H           | 4.89935  | -0.80056 | -1.96331 | H            | 4.90792  | -0.78858 | -1.94571 |
| H           | 4.21220  | 0.10532  | -3.30405 | H            | 4.20507  | 0.07248  | -3.30813 |
| H           | 3.21755  | -1.07988 | -2.45833 | H            | 3.23587  | -1.11581 | -2.43974 |
| Ru          | 1.22279  | -0.79718 | 0.56193  | Ru           | 1.20823  | -0.77535 | 0.56950  |
| O           | 1.08320  | -2.74026 | -0.34541 | O            | 1.08133  | -2.76394 | -0.29853 |
| C           | 0.99935  | -2.95647 | -1.58192 | C            | 1.03493  | -3.03703 | -1.51052 |
| O           | 0.81288  | -2.05150 | -2.45840 | O            | 0.83297  | -2.16080 | -2.44083 |
| C           | 1.11336  | -4.37322 | -2.06752 | C            | 1.21593  | -4.44835 | -1.97401 |
| H           | 1.73775  | -4.41109 | -2.96017 | H            | 0.24639  | -4.83103 | -2.30118 |
| H           | 0.11594  | -4.71940 | -2.34827 | H            | 1.59873  | -5.07286 | -1.17140 |
| H           | 1.51331  | -5.02409 | -1.29409 | H            | 1.88577  | -4.47485 | -2.83378 |
| O           | -0.63224 | -1.37128 | 1.31595  | O            | -0.64274 | -1.34866 | 1.33387  |
| C           | -1.41687 | -0.67451 | 2.07475  | C            | -1.43114 | -0.65249 | 2.08853  |
| O           | -1.20838 | 0.46898  | 2.48348  | O            | -1.22568 | 0.49162  | 2.49719  |
| C           | -2.68340 | -1.41277 | 2.47333  | C            | -2.69838 | -1.39176 | 2.48371  |
| H           | -2.95787 | -2.16293 | 1.73481  | H            | -2.52871 | -1.87910 | 3.44781  |
| H           | -3.49866 | -0.70552 | 2.61676  | H            | -2.95916 | -2.15652 | 1.75539  |
| H           | -2.50294 | -1.92008 | 3.42509  | H            | -3.51948 | -0.68656 | 2.60250  |
| <b>TS-3</b> |          |          |          | <b>INT-3</b> |          |          |          |
| C           | -3.66543 | 1.28877  | -0.47894 | C            | 3.85310  | 1.08927  | 0.14649  |
| C           | -4.62963 | 2.26956  | -0.19334 | C            | 4.92268  | 1.95138  | -0.15215 |
| C           | -4.10057 | 0.00404  | -0.80688 | C            | 4.14485  | -0.22402 | 0.52389  |
| C           | -5.97268 | 1.96616  | -0.24106 | C            | 6.22457  | 1.51098  | -0.06866 |
| C           | -5.45883 | -0.31505 | -0.85763 | C            | 5.46231  | -0.68104 | 0.60986  |
| C           | -6.38572 | 0.66751  | -0.57500 | C            | 6.49227  | 0.18736  | 0.31424  |
| H           | -4.28449 | 3.26374  | 0.06001  | H            | 4.68905  | 2.96620  | -0.44750 |
| H           | -6.71195 | 2.72721  | -0.02323 | H            | 7.04343  | 2.18200  | -0.29750 |
| H           | -5.75787 | -1.32289 | -1.11734 | H            | 5.64874  | -1.70495 | 0.90920  |
| H           | -7.44235 | 0.43025  | -0.61230 | H            | 7.51700  | -0.15877 | 0.37982  |
| C           | -2.23350 | 1.57782  | -0.43766 | C            | 2.46422  | 1.53356  | 0.04176  |
| O           | -1.77973 | 2.67936  | -0.11332 | O            | 2.14703  | 2.66844  | -0.31762 |
| C           | -1.34512 | 0.46420  | -0.79033 | C            | 1.44524  | 0.51821  | 0.36401  |

|    |          |          |          |    |          |          |          |
|----|----------|----------|----------|----|----------|----------|----------|
| C  | -1.87610 | -0.77292 | -1.07070 | C  | 1.85167  | -0.72717 | 0.77919  |
| O  | -3.22646 | -0.99251 | -1.08434 | O  | 3.16804  | -1.10824 | 0.82985  |
| O  | -0.04576 | 0.71381  | -0.83112 | O  | 0.19293  | 0.86543  | 0.17121  |
| H  | 0.41524  | 2.47183  | -0.98121 | C  | 0.94138  | -1.79787 | 1.16252  |
| C  | -1.12224 | -2.01687 | -1.24439 | C  | 1.23150  | -3.14017 | 0.90358  |
| C  | -1.73769 | -3.24351 | -0.95405 | C  | -0.25331 | -1.47516 | 1.84465  |
| C  | 0.22917  | -2.02707 | -1.63051 | C  | 0.33455  | -4.13233 | 1.27987  |
| C  | -1.02137 | -4.43013 | -1.01813 | C  | -1.14804 | -2.48969 | 2.20884  |
| C  | 0.93813  | -3.22077 | -1.69590 | C  | -0.86357 | -3.81615 | 1.91929  |
| C  | 0.32138  | -4.42541 | -1.38216 | H  | 2.15369  | -3.40544 | 0.40325  |
| H  | -2.77821 | -3.26406 | -0.66249 | H  | 0.57105  | -5.16877 | 1.06707  |
| H  | -1.51627 | -5.36427 | -0.77887 | H  | -2.04527 | -2.22496 | 2.75524  |
| H  | 1.97701  | -3.18447 | -1.99234 | H  | -1.55240 | -4.60175 | 2.20481  |
| H  | 0.87835  | -5.35372 | -1.42800 | C  | -3.51830 | -0.70997 | -0.81501 |
| C  | 3.05373  | -0.91512 | 1.64791  | C  | -2.77512 | 0.24763  | -1.56873 |
| C  | 2.57357  | 0.37145  | 2.00654  | C  | -2.93821 | -1.97243 | -0.60281 |
| C  | 2.09039  | -1.93639 | 1.50734  | C  | -1.52752 | -0.08696 | -2.13756 |
| C  | 1.19755  | 0.59694  | 2.26103  | C  | -1.66297 | -2.28554 | -1.15660 |
| C  | 0.71778  | -1.73345 | 1.85118  | C  | -0.95306 | -1.37645 | -1.97058 |
| C  | 0.25520  | -0.48073 | 2.27343  | H  | -3.13859 | 1.26005  | -1.66507 |
| H  | 3.23667  | 1.22405  | 1.96132  | H  | -3.42947 | -2.68670 | 0.04278  |
| H  | 2.38855  | -2.89136 | 1.09629  | H  | -0.97083 | 0.70588  | -2.61272 |
| H  | 0.86326  | 1.61054  | 2.42720  | H  | -1.20480 | -3.23208 | -0.90354 |
| H  | 0.02556  | -2.54818 | 1.70005  | C  | -4.80353 | -0.31557 | -0.16383 |
| C  | 4.48979  | -1.13786 | 1.29123  | H  | -5.13568 | -1.07244 | 0.54533  |
| H  | 4.58346  | -1.90149 | 0.52099  | H  | -4.67609 | 0.62806  | 0.36656  |
| H  | 4.94556  | -0.21823 | 0.92578  | H  | -5.57881 | -0.18532 | -0.92337 |
| H  | 5.04617  | -1.46313 | 2.17475  | C  | 0.35948  | -1.78526 | -2.59913 |
| C  | -1.17170 | -0.19228 | 2.67779  | H  | 0.89744  | -2.37369 | -1.85092 |
| H  | -1.48301 | 0.69774  | 2.12293  | C  | 1.23978  | -0.60733 | -3.01278 |
| C  | -1.19471 | 0.16050  | 4.17555  | C  | 0.07672  | -2.69924 | -3.80212 |
| C  | -2.15388 | -1.32243 | 2.38698  | H  | -0.50004 | -3.57945 | -3.51242 |
| H  | -2.13799 | -1.62368 | 1.34258  | H  | -0.48602 | -2.16315 | -4.57046 |
| H  | -1.93704 | -2.20195 | 2.99855  | H  | 1.01477  | -3.03854 | -4.24571 |
| H  | -3.16706 | -0.99793 | 2.62743  | H  | 0.80644  | -0.06396 | -3.85590 |
| H  | -0.86789 | -0.69097 | 4.77732  | H  | 2.21750  | -0.97282 | -3.33004 |
| H  | -2.20990 | 0.42108  | 4.47945  | H  | 1.38706  | 0.09542  | -2.19515 |
| H  | -0.54677 | 1.00769  | 4.40472  | Ru | -1.45251 | -0.44969 | 0.02023  |
| Ru | 1.40045  | -0.25244 | 0.31657  | O  | -2.38978 | 0.76344  | 1.44714  |
| O  | 1.73793  | 3.33011  | 0.77550  | C  | -1.96331 | 1.40181  | 2.48971  |
| C  | 1.76768  | 3.68915  | -0.38591 | O  | -0.88207 | 1.23655  | 3.05587  |



|             |          |          |          |              |          |          |          |
|-------------|----------|----------|----------|--------------|----------|----------|----------|
| O           | 0.94353  | 3.23830  | -1.32473 | C            | -2.94857 | 2.44228  | 2.99137  |
| C           | 2.75289  | 4.68962  | -0.92759 | H            | -2.88294 | 3.31389  | 2.33623  |
| H           | 3.51625  | 4.15076  | -1.49371 | H            | -2.70044 | 2.74495  | 4.00698  |
| H           | 3.22836  | 5.22903  | -0.11199 | H            | -3.97058 | 2.06658  | 2.94636  |
| H           | 2.26543  | 5.38537  | -1.61077 | H            | -0.37062 | -0.47918 | 2.26802  |
| O           | 2.65160  | 0.82204  | -0.96173 | H            | -0.29432 | 2.47754  | 0.05724  |
| C           | 3.32938  | 0.11898  | -1.80401 | O            | -0.79926 | 3.33861  | 0.14408  |
| O           | 3.25646  | -1.11122 | -1.89535 | O            | -1.17585 | 3.09606  | -2.05666 |
| C           | 4.25202  | 0.93214  | -2.68780 | C            | -1.30995 | 3.71728  | -1.01730 |
| H           | 5.02012  | 1.40786  | -2.07464 | C            | -2.09641 | 4.99713  | -0.90628 |
| H           | 3.69071  | 1.72647  | -3.18143 | H            | -1.49457 | 5.76945  | -0.42520 |
| H           | 4.72680  | 0.29597  | -3.43141 | H            | -2.41386 | 5.32903  | -1.89141 |
| H           | 0.71613  | -1.11607 | -1.94994 | H            | -2.97351 | 4.82993  | -0.27726 |
| <b>TS-4</b> |          |          |          | <b>INT-4</b> |          |          |          |
| C           | 3.75513  | 1.39485  | -0.44850 | C            | -3.73118 | -0.20198 | -1.14277 |
| C           | 4.73013  | 2.28762  | -0.92678 | C            | -4.85295 | 0.03994  | -1.95144 |
| C           | 4.17340  | 0.19065  | 0.11847  | C            | -3.91744 | -0.29628 | 0.23736  |
| C           | 6.06877  | 1.97781  | -0.83464 | C            | -6.10555 | 0.18070  | -1.39336 |
| C           | 5.52987  | -0.13308 | 0.21614  | C            | -5.18059 | -0.15437 | 0.81423  |
| C           | 6.46694  | 0.76042  | -0.25963 | C            | -6.26705 | 0.08226  | -0.00398 |
| H           | 4.39546  | 3.21906  | -1.36525 | H            | -4.70127 | 0.10971  | -3.02095 |
| H           | 6.81613  | 2.66993  | -1.20299 | H            | -6.96619 | 0.36619  | -2.02441 |
| H           | 5.81853  | -1.07557 | 0.66454  | H            | -5.28399 | -0.23308 | 1.88933  |
| H           | 7.52045  | 0.51765  | -0.18654 | H            | -7.25156 | 0.19284  | 0.43498  |
| C           | 2.32987  | 1.68970  | -0.53920 | C            | -2.38909 | -0.35877 | -1.71267 |
| O           | 1.89297  | 2.73516  | -1.02744 | O            | -2.17180 | -0.28971 | -2.92778 |
| C           | 1.41638  | 0.65556  | -0.01645 | C            | -1.33313 | -0.60724 | -0.73780 |
| C           | 1.93275  | -0.48889 | 0.55005  | C            | -1.61109 | -0.67393 | 0.60107  |
| O           | 3.29046  | -0.70794 | 0.60046  | O            | -2.88001 | -0.51942 | 1.08252  |
| O           | 0.14116  | 0.93943  | -0.14115 | O            | -0.09379 | -0.79568 | -1.20580 |
| C           | 1.18123  | -1.58088 | 1.16592  | C            | -0.61922 | -0.90063 | 1.64965  |
| C           | 1.85544  | -2.75587 | 1.53987  | C            | -1.06121 | -1.41478 | 2.88206  |
| C           | -0.20855 | -1.46854 | 1.42621  | C            | 0.74660  | -0.59133 | 1.45290  |
| C           | 1.18725  | -3.79087 | 2.17424  | C            | -0.17466 | -1.65205 | 3.91620  |
| C           | -0.83755 | -2.51578 | 2.11792  | C            | 1.61426  | -0.84364 | 2.52308  |
| C           | -0.16528 | -3.67099 | 2.48255  | C            | 1.17407  | -1.36564 | 3.73302  |
| H           | 2.90974  | -2.85804 | 1.33097  | H            | -2.11071 | -1.64335 | 3.01344  |
| H           | 1.72948  | -4.68971 | 2.44509  | H            | -0.53142 | -2.05943 | 4.85484  |
| H           | -1.88289 | -2.40788 | 2.38603  | H            | 2.67090  | -0.63335 | 2.40840  |
| H           | -0.68160 | -4.46634 | 3.00730  | H            | 1.88334  | -1.54553 | 4.53405  |
| C           | -3.34951 | -0.09413 | -1.26056 | C            | 3.22743  | 1.15850  | -1.55643 |

|    |          |          |          |    |          |          |          |
|----|----------|----------|----------|----|----------|----------|----------|
| C  | -2.23608 | 0.09265  | -2.09385 | C  | 2.00318  | 1.63835  | -2.01076 |
| C  | -3.43439 | -1.30931 | -0.51012 | C  | 3.48855  | 1.21563  | -0.14369 |
| C  | -1.22645 | -0.90926 | -2.19739 | C  | 1.03289  | 2.13875  | -1.08571 |
| C  | -2.44220 | -2.29211 | -0.63062 | C  | 2.58174  | 1.80935  | 0.74536  |
| C  | -1.31443 | -2.12441 | -1.49553 | C  | 1.31457  | 2.29166  | 0.28916  |
| H  | -2.09263 | 1.04664  | -2.57987 | H  | 1.73535  | 1.53774  | -3.05434 |
| H  | -4.24248 | -1.44955 | 0.19591  | H  | 4.40004  | 0.77781  | 0.24181  |
| H  | -0.34798 | -0.68784 | -2.78511 | H  | 0.05703  | 2.40359  | -1.46541 |
| H  | -2.50186 | -3.17745 | -0.01269 | H  | 2.81176  | 1.83377  | 1.80244  |
| C  | -4.37337 | 0.98052  | -1.08084 | C  | 4.22387  | 0.52017  | -2.47344 |
| H  | -4.67300 | 1.05281  | -0.03535 | H  | 4.60508  | -0.40618 | -2.04124 |
| H  | -3.98317 | 1.94345  | -1.40445 | H  | 3.77960  | 0.29624  | -3.44270 |
| H  | -5.26219 | 0.74443  | -1.67360 | H  | 5.07613  | 1.18735  | -2.63132 |
| C  | -0.29690 | -3.23511 | -1.61019 | C  | 0.37177  | 2.94720  | 1.27195  |
| H  | -0.11737 | -3.60121 | -0.59606 | H  | 0.44795  | 2.37753  | 2.20292  |
| C  | 1.03878  | -2.79015 | -2.19871 | C  | -1.09040 | 2.94151  | 0.83313  |
| C  | -0.89502 | -4.39035 | -2.42886 | C  | 0.85156  | 4.38048  | 1.54994  |
| H  | -1.82607 | -4.75619 | -1.99202 | H  | 1.88138  | 4.39771  | 1.91166  |
| H  | -1.10461 | -4.07081 | -3.45276 | H  | 0.80253  | 4.98645  | 0.64158  |
| H  | -0.19244 | -5.22487 | -2.47182 | H  | 0.21997  | 4.85191  | 2.30567  |
| H  | 0.94168  | -2.52435 | -3.25437 | H  | -1.25086 | 3.58240  | -0.03733 |
| H  | 1.75938  | -3.60658 | -2.13269 | H  | -1.71883 | 3.32526  | 1.63846  |
| H  | 1.45091  | -1.93392 | -1.66587 | H  | -1.43104 | 1.93743  | 0.58583  |
| Ru | -1.45639 | -0.40007 | -0.05656 | Ru | 1.55154  | 0.16191  | -0.28783 |
| O  | -2.28763 | 0.98031  | 1.32975  | O  | 2.57590  | -1.75964 | -0.40296 |
| C  | -1.69342 | 1.29863  | 2.39391  | C  | 2.10951  | -2.86700 | -0.71317 |
| O  | -0.63905 | 0.71750  | 2.79302  | O  | 0.88286  | -3.05502 | -1.08967 |
| C  | -2.25119 | 2.41884  | 3.22295  | C  | 2.96583  | -4.09477 | -0.67314 |
| H  | -1.59670 | 3.28470  | 3.10451  | H  | 3.97638  | -3.84634 | -0.36118 |
| H  | -2.25463 | 2.14129  | 4.27677  | H  | 2.98083  | -4.56086 | -1.65984 |
| H  | -3.25309 | 2.68184  | 2.89279  | H  | 2.52833  | -4.81498 | 0.02088  |
| H  | -0.49147 | -0.27311 | 1.98859  | H  | 0.38270  | -2.12178 | -1.13794 |
| H  | -0.31961 | 2.59302  | -0.06271 |    |          |          |          |
| O  | -0.75059 | 3.42966  | 0.27303  |    |          |          |          |
| O  | -1.87181 | 3.37151  | -1.67135 |    |          |          |          |
| C  | -1.66322 | 3.87106  | -0.58175 |    |          |          |          |
| C  | -2.41740 | 5.05739  | -0.04354 |    |          |          |          |
| H  | -1.72247 | 5.82835  | 0.29205  |    |          |          |          |
| H  | -3.08305 | 5.45623  | -0.80441 |    |          |          |          |
| H  | -3.00106 | 4.74619  | 0.82570  |    |          |          |          |

| <b>INT-5</b> |          |          |          | <b>TS-5</b> |          |          |          |
|--------------|----------|----------|----------|-------------|----------|----------|----------|
| C            | -4.12970 | -0.76377 | 0.85304  | C           | 1.61708  | 3.58649  | -0.71973 |
| C            | -5.25000 | -1.60405 | 0.95399  | C           | 2.02363  | 4.86813  | -0.31360 |
| C            | -4.31467 | 0.60973  | 1.02424  | C           | 2.38365  | 2.92249  | -1.68000 |
| C            | -6.49838 | -1.08424 | 1.22158  | C           | 3.14791  | 5.45460  | -0.85267 |
| C            | -5.57441 | 1.14784  | 1.29330  | C           | 3.52417  | 3.50760  | -2.23408 |
| C            | -6.65818 | 0.29838  | 1.39196  | C           | 3.89908  | 4.76901  | -1.81882 |
| H            | -5.09907 | -2.66766 | 0.82060  | H           | 1.42487  | 5.37682  | 0.43088  |
| H            | -7.35657 | -1.74025 | 1.30243  | H           | 3.45325  | 6.44398  | -0.53451 |
| H            | -5.67738 | 2.21868  | 1.41760  | H           | 4.09177  | 2.96070  | -2.97678 |
| H            | -7.63948 | 0.70740  | 1.60164  | H           | 4.78249  | 5.23029  | -2.24424 |
| C            | -2.79134 | -1.29385 | 0.57056  | C           | 0.41775  | 2.95231  | -0.16536 |
| O            | -2.58481 | -2.49252 | 0.34805  | O           | -0.30756 | 3.50840  | 0.66195  |
| C            | -1.72796 | -0.29461 | 0.55178  | C           | 0.13359  | 1.60445  | -0.67465 |
| C            | -2.01786 | 1.03678  | 0.67242  | C           | 0.95775  | 1.04445  | -1.61147 |
| O            | -3.28577 | 1.48625  | 0.91342  | O           | 2.06204  | 1.67928  | -2.11190 |
| O            | -0.47264 | -0.70729 | 0.40362  | O           | -0.95834 | 0.99409  | -0.24902 |
| C            | -1.04886 | 2.11382  | 0.48160  | C           | 0.74018  | -0.26668 | -2.20274 |
| C            | -1.36772 | 3.38466  | 0.99515  | C           | 1.02450  | -0.44076 | -3.56633 |
| C            | 0.12907  | 1.93337  | -0.28057 | C           | 0.26948  | -1.36046 | -1.43623 |
| C            | -0.56491 | 4.48213  | 0.74816  | C           | 0.83782  | -1.66183 | -4.18746 |
| C            | 0.90523  | 3.06991  | -0.52641 | C           | 0.14787  | -2.60271 | -2.08601 |
| C            | 0.57046  | 4.32472  | -0.03726 | C           | 0.39581  | -2.75130 | -3.43656 |
| H            | -2.26273 | 3.49926  | 1.59216  | H           | 1.38201  | 0.40722  | -4.13642 |
| H            | -0.82703 | 5.45093  | 1.15686  | H           | 1.04809  | -1.77112 | -5.24460 |
| H            | 1.81227  | 2.97766  | -1.10793 | H           | -0.12581 | -3.47541 | -1.50885 |
| H            | 1.20611  | 5.17528  | -0.25755 | H           | 0.26842  | -3.72068 | -3.90456 |
| C            | 2.02519  | -0.22471 | -2.94578 | C           | -1.60179 | -2.40283 | 1.97936  |
| C            | 1.26426  | -1.42499 | -2.81755 | C           | -2.33472 | -1.19175 | 2.14628  |
| C            | 1.33700  | 0.99409  | -3.11889 | C           | -1.75293 | -3.10512 | 0.75961  |
| C            | -0.12149 | -1.37331 | -2.72152 | C           | -3.08549 | -0.67876 | 1.08648  |
| C            | -0.07758 | 1.02045  | -3.11195 | C           | -2.58244 | -2.60745 | -0.27653 |
| C            | -0.83604 | -0.13829 | -2.87537 | C           | -3.22872 | -1.37207 | -0.15856 |
| H            | 1.77698  | -2.36701 | -2.67682 | H           | -2.25205 | -0.62967 | 3.06640  |
| H            | 1.89266  | 1.91259  | -3.24768 | H           | -1.21396 | -4.03193 | 0.61167  |
| H            | -0.67625 | -2.27841 | -2.50835 | H           | -3.52045 | 0.30447  | 1.20140  |
| H            | -0.57348 | 1.97609  | -3.20138 | H           | -2.62484 | -3.15239 | -1.20770 |
| C            | 3.52077  | -0.27559 | -2.95599 | C           | -0.75855 | -2.94398 | 3.09229  |
| H            | 3.94729  | 0.70195  | -2.73540 | H           | -0.07044 | -3.70547 | 2.72904  |
| H            | 3.89316  | -0.99288 | -2.22599 | H           | -0.18529 | -2.15038 | 3.57153  |
| H            | 3.87480  | -0.58590 | -3.94309 | H           | -1.39699 | -3.40335 | 3.85204  |

|    |          |          |          |    |          |          |          |
|----|----------|----------|----------|----|----------|----------|----------|
| C  | -2.34750 | -0.16235 | -2.88940 | C  | -4.05357 | -0.75298 | -1.26325 |
| H  | -2.65539 | -0.81535 | -2.06945 | H  | -3.84758 | 0.31957  | -1.23111 |
| C  | -2.83446 | -0.80200 | -4.20038 | C  | -5.55000 | -0.95377 | -0.98362 |
| C  | -2.99466 | 1.20590  | -2.68732 | C  | -3.67740 | -1.25131 | -2.65787 |
| H  | -2.60784 | 1.71488  | -1.80600 | H  | -2.60771 | -1.14303 | -2.84331 |
| H  | -2.83506 | 1.85334  | -3.55337 | H  | -3.94634 | -2.30108 | -2.80012 |
| H  | -4.07223 | 1.08765  | -2.56535 | H  | -4.21547 | -0.67609 | -3.41329 |
| H  | -2.53401 | -0.19727 | -5.05977 | H  | -5.81013 | -2.01515 | -1.01373 |
| H  | -3.92372 | -0.87386 | -4.20036 | H  | -6.15079 | -0.43668 | -1.73471 |
| H  | -2.43054 | -1.80678 | -4.33539 | H  | -5.83021 | -0.56651 | -0.00197 |
| Ru | 0.67137  | 0.11094  | -1.15467 | Ru | -0.98426 | -1.04834 | 0.30814  |
| C  | 2.21820  | -0.90667 | 0.06929  | C  | 0.88012  | -0.60335 | 1.12777  |
| C  | 2.41493  | 0.29351  | 0.31915  | C  | 1.27759  | -1.45188 | 0.24206  |
| C  | 2.46146  | -2.32155 | 0.16577  | C  | 1.36712  | 0.18337  | 2.23006  |
| C  | 1.41224  | -3.24529 | 0.24810  | C  | 0.50403  | 0.98188  | 2.99013  |
| C  | 3.78556  | -2.78247 | 0.18993  | C  | 2.73752  | 0.18308  | 2.54850  |
| C  | 1.68933  | -4.59984 | 0.35583  | C  | 0.98780  | 1.73576  | 4.05064  |
| C  | 4.05163  | -4.14098 | 0.29287  | C  | 3.21503  | 0.94079  | 3.60486  |
| C  | 3.00531  | -5.05397 | 0.37425  | C  | 2.34177  | 1.71627  | 4.36583  |
| H  | 0.39340  | -2.88271 | 0.24991  | H  | -0.54092 | 1.02764  | 2.71795  |
| H  | 4.59876  | -2.06952 | 0.12879  | H  | 3.41985  | -0.41633 | 1.95934  |
| H  | 0.87135  | -5.30705 | 0.42872  | H  | 0.30567  | 2.35130  | 4.62551  |
| H  | 5.07881  | -4.48651 | 0.30911  | H  | 4.27350  | 0.92857  | 3.83896  |
| H  | 3.21434  | -6.11434 | 0.45399  | H  | 2.71843  | 2.30740  | 5.19235  |
| C  | 3.02846  | 1.42492  | 0.95449  | C  | 2.30166  | -2.48571 | 0.11321  |
| C  | 4.19444  | 1.98277  | 0.41709  | C  | 2.61525  | -3.26450 | 1.23516  |
| C  | 2.46960  | 1.98866  | 2.10733  | C  | 3.04514  | -2.66705 | -1.05830 |
| C  | 4.79481  | 3.07519  | 1.02786  | C  | 3.63495  | -4.20479 | 1.18363  |
| C  | 3.07699  | 3.07783  | 2.71342  | C  | 4.07023  | -3.60144 | -1.10386 |
| C  | 4.23693  | 3.62771  | 2.17597  | C  | 4.36443  | -4.37845 | 0.01234  |
| H  | 4.62981  | 1.55200  | -0.47547 | H  | 2.05806  | -3.11837 | 2.15013  |
| H  | 1.56719  | 1.55930  | 2.51697  | H  | 2.82675  | -2.06405 | -1.92756 |
| H  | 5.69973  | 3.49621  | 0.60534  | H  | 3.86047  | -4.80197 | 2.05956  |
| H  | 2.63846  | 3.50592  | 3.60725  | H  | 4.64435  | -3.72268 | -2.01509 |
| H  | 4.70522  | 4.48214  | 2.65049  | H  | 5.16133  | -5.11175 | -0.02916 |
| H  | 0.16878  | -0.78960 | 1.90709  | H  | -2.23179 | 1.98623  | -0.28327 |
| O  | 0.55566  | -0.67491 | 2.83093  | O  | -2.99987 | 2.58466  | -0.56184 |
| O  | -0.39731 | -2.65522 | 3.30481  | O  | -3.62568 | 2.51217  | 1.59378  |
| C  | 0.28332  | -1.70321 | 3.62901  | C  | -3.75884 | 2.94656  | 0.46397  |
| C  | 0.92505  | -1.55035 | 4.98377  | C  | -4.81405 | 3.94768  | 0.07485  |
| H  | 0.61129  | -0.61057 | 5.44158  | H  | -5.50394 | 4.10634  | 0.89977  |

|              |          |          |          |             |          |          |          |
|--------------|----------|----------|----------|-------------|----------|----------|----------|
| H            | 0.65154  | -2.38481 | 5.62426  | H           | -4.33404 | 4.89381  | -0.18523 |
| H            | 2.01036  | -1.51006 | 4.87218  | H           | -5.35438 | 3.60408  | -0.80832 |
| <b>INT-6</b> |          |          |          | <b>TS-6</b> |          |          |          |
| C            | 2.10013  | 3.43408  | 0.10072  | C           | 2.36675  | -3.16351 | 0.33255  |
| C            | 2.63972  | 4.59932  | 0.67243  | C           | 3.12845  | -4.23050 | -0.17125 |
| C            | 2.77385  | 2.85333  | -0.97662 | C           | 3.00278  | -2.22000 | 1.14991  |
| C            | 3.80083  | 5.15273  | 0.18012  | C           | 4.46677  | -4.35112 | 0.13435  |
| C            | 3.95364  | 3.40479  | -1.48218 | C           | 4.35851  | -2.33129 | 1.45773  |
| C            | 4.45921  | 4.54988  | -0.90275 | C           | 5.08139  | -3.39438 | 0.95350  |
| H            | 2.11350  | 5.04446  | 1.50709  | H           | 2.63060  | -4.94941 | -0.80943 |
| H            | 4.20831  | 6.05195  | 0.62581  | H           | 5.04467  | -5.17867 | -0.25843 |
| H            | 4.44685  | 2.92375  | -2.31772 | H           | 4.81746  | -1.58104 | 2.08908  |
| H            | 5.37320  | 4.98493  | -1.28940 | H           | 6.13405  | -3.48506 | 1.19449  |
| C            | 0.86501  | 2.83548  | 0.61505  | C           | 0.95628  | -3.00513 | -0.03340 |
| O            | 0.25740  | 3.29288  | 1.58480  | O           | 0.34991  | -3.79801 | -0.75837 |
| C            | 0.39838  | 1.64794  | -0.11351 | C           | 0.32695  | -1.78726 | 0.48827  |
| C            | 1.15067  | 1.15313  | -1.13403 | C           | 1.04996  | -0.90051 | 1.30682  |
| O            | 2.31637  | 1.72666  | -1.57357 | O           | 2.33649  | -1.17478 | 1.70961  |
| O            | -0.74388 | 1.08417  | 0.23796  | O           | -0.84004 | -1.42267 | 0.08102  |
| C            | 0.83212  | -0.05759 | -1.92934 | C           | 0.25864  | -0.11115 | 2.28179  |
| C            | 0.57386  | 0.12005  | -3.31715 | C           | -0.21018 | -0.66203 | 3.46871  |
| C            | 1.17809  | -1.35835 | -1.46512 | C           | -0.13052 | 1.18147  | 1.88948  |
| C            | 0.66844  | -0.92453 | -4.20020 | C           | -1.06190 | 0.07153  | 4.28524  |
| C            | 1.30020  | -2.40612 | -2.40674 | C           | -1.02303 | 1.89928  | 2.70578  |
| C            | 1.06357  | -2.19514 | -3.74209 | C           | -1.47651 | 1.34559  | 3.88908  |
| H            | 0.32760  | 1.11437  | -3.67021 | H           | 0.08835  | -1.66490 | 3.75142  |
| H            | 0.47023  | -0.76578 | -5.25337 | H           | -1.41189 | -0.34783 | 5.22067  |
| H            | 1.60873  | -3.38158 | -2.05133 | H           | -1.35738 | 2.88171  | 2.39868  |
| H            | 1.17938  | -3.00934 | -4.44833 | H           | -2.16304 | 1.90596  | 4.51311  |
| C            | -2.13189 | -2.76902 | -0.99724 | C           | -1.20951 | 1.31540  | -2.71200 |
| C            | -2.73093 | -2.11352 | 0.11393  | C           | -1.92002 | 0.10670  | -2.53086 |
| C            | -2.09574 | -2.04675 | -2.21259 | C           | -1.52185 | 2.39633  | -1.84216 |
| C            | -3.23922 | -0.80783 | -0.01101 | C           | -2.93115 | 0.01065  | -1.54392 |
| C            | -2.73313 | -0.78436 | -2.37759 | C           | -2.58102 | 2.30670  | -0.89965 |
| C            | -3.28594 | -0.13190 | -1.27977 | C           | -3.32080 | 1.12295  | -0.75274 |
| H            | -2.73157 | -2.58429 | 1.08660  | H           | -1.67463 | -0.76364 | -3.12482 |
| H            | -1.57198 | -2.47409 | -3.05585 | H           | -0.97252 | 3.32244  | -1.92202 |
| H            | -3.58976 | -0.30386 | 0.87757  | H           | -3.39159 | -0.95426 | -1.39160 |
| H            | -2.67445 | -0.29516 | -3.33922 | H           | -2.78552 | 3.15289  | -0.25628 |

|    |          |          |          |    |          |          |          |
|----|----------|----------|----------|----|----------|----------|----------|
| C  | -1.56107 | -4.14903 | -0.88806 | C  | -0.19696 | 1.47756  | -3.80326 |
| H  | -0.80336 | -4.31868 | -1.65131 | H  | 0.65492  | 2.07448  | -3.47906 |
| H  | -1.10816 | -4.31380 | 0.08926  | H  | 0.17012  | 0.51450  | -4.15249 |
| H  | -2.34800 | -4.89622 | -1.02426 | H  | -0.65901 | 1.99128  | -4.65151 |
| C  | -3.88919 | 1.24931  | -1.37490 | C  | -4.42799 | 1.02112  | 0.27223  |
| H  | -3.88036 | 1.66400  | -0.36682 | H  | -4.38629 | 1.93665  | 0.86953  |
| C  | -5.35098 | 1.14209  | -1.83491 | C  | -4.25358 | -0.16599 | 1.22375  |
| C  | -3.08788 | 2.20138  | -2.26417 | C  | -5.79227 | 0.97303  | -0.43011 |
| H  | -2.05476 | 2.27645  | -1.92323 | H  | -5.93512 | 1.83644  | -1.08291 |
| H  | -3.08734 | 1.88094  | -3.30850 | H  | -5.88430 | 0.07036  | -1.03909 |
| H  | -3.53209 | 3.19798  | -2.23071 | H  | -6.59884 | 0.96552  | 0.30608  |
| H  | -5.41048 | 0.74562  | -2.85159 | H  | -4.31800 | -1.11614 | 0.69242  |
| H  | -5.82271 | 2.12679  | -1.82716 | H  | -5.04171 | -0.15664 | 1.97967  |
| H  | -5.92857 | 0.48433  | -1.18217 | H  | -3.28915 | -0.12783 | 1.73053  |
| Ru | -1.13738 | -0.79264 | -0.67156 | Ru | -1.03383 | 0.69305  | -0.54632 |
| C  | 0.33135  | -1.38599 | 0.68985  | C  | 0.99132  | 0.67879  | -0.19077 |
| C  | 1.45023  | -1.59959 | -0.01426 | C  | 0.54646  | 1.68791  | 0.68354  |
| C  | 0.17960  | -1.41333 | 2.14467  | C  | 2.20391  | 0.55612  | -0.97408 |
| C  | -0.50561 | -2.43956 | 2.80438  | C  | 3.42219  | 1.08650  | -0.51705 |
| C  | 0.72787  | -0.38083 | 2.91563  | C  | 2.22012  | -0.23884 | -2.12898 |
| C  | -0.63331 | -2.43888 | 4.18712  | C  | 4.60024  | 0.85771  | -1.21108 |
| C  | 0.59565  | -0.37850 | 4.29767  | C  | 3.39801  | -0.46402 | -2.82413 |
| C  | -0.08654 | -1.40584 | 4.94112  | C  | 4.59340  | 0.08668  | -2.37025 |
| H  | -0.91952 | -3.25968 | 2.23195  | H  | 3.43572  | 1.67866  | 0.38849  |
| H  | 1.25813  | 0.42095  | 2.41990  | H  | 1.29504  | -0.69366 | -2.45823 |
| H  | -1.16026 | -3.24937 | 4.67797  | H  | 5.53033  | 1.27738  | -0.84506 |
| H  | 1.02537  | 0.43233  | 4.87505  | H  | 3.38868  | -1.08068 | -3.71547 |
| H  | -0.19090 | -1.40211 | 6.01974  | H  | 5.51560  | -0.09279 | -2.91036 |
| C  | 2.79485  | -2.01929 | 0.41929  | C  | 1.02034  | 3.09284  | 0.62080  |
| C  | 3.00843  | -2.77323 | 1.58197  | C  | 1.34378  | 3.68847  | -0.60494 |
| C  | 3.91222  | -1.66998 | -0.35183 | C  | 1.23793  | 3.84237  | 1.78269  |
| C  | 4.28937  | -3.14801 | 1.96166  | C  | 1.83974  | 4.98087  | -0.67190 |
| C  | 5.19391  | -2.04488 | 0.03026  | C  | 1.73664  | 5.13838  | 1.71944  |
| C  | 5.39012  | -2.78549 | 1.19040  | C  | 2.03370  | 5.71840  | 0.49263  |
| H  | 2.16406  | -3.07259 | 2.18588  | H  | 1.21889  | 3.11975  | -1.51381 |
| H  | 3.77548  | -1.08900 | -1.25592 | H  | 1.03647  | 3.40374  | 2.75017  |
| H  | 4.42951  | -3.73452 | 2.86271  | H  | 2.07808  | 5.41418  | -1.63646 |
| H  | 6.04208  | -1.75638 | -0.58023 | H  | 1.89937  | 5.69281  | 2.63668  |
| H  | 6.38892  | -3.08154 | 1.48901  | H  | 2.41893  | 6.72999  | 0.44271  |
| H  | -1.86705 | 1.93898  | 1.18621  | H  | -1.97677 | -2.66388 | 0.18691  |
| O  | -2.60888 | 2.52596  | 1.52276  | O  | -2.59311 | -3.37904 | 0.51851  |

|              |          |          |          |             |          |          |          |
|--------------|----------|----------|----------|-------------|----------|----------|----------|
| O            | -3.17642 | 0.82684  | 2.88138  | C           | -3.46118 | -3.75173 | -0.41527 |
| C            | -3.33171 | 1.96633  | 2.48357  | O           | -3.53506 | -3.23460 | -1.51422 |
| C            | -4.38741 | 2.90072  | 3.01376  | C           | -4.34811 | -4.87676 | 0.04487  |
| H            | -4.98608 | 2.39968  | 3.76986  | H           | -5.07274 | -5.12234 | -0.72690 |
| H            | -3.91382 | 3.78586  | 3.44287  | H           | -4.86276 | -4.59250 | 0.96442  |
| H            | -5.02693 | 3.24077  | 2.19703  | H           | -3.73887 | -5.75373 | 0.27263  |
| <b>INT-7</b> |          |          |          | <b>TS-7</b> |          |          |          |
| C            | 4.06354  | -1.16549 | -0.33430 | C           | 3.45295  | -1.66239 | 0.04370  |
| C            | 5.33885  | -1.70835 | -0.54802 | C           | 4.54956  | -2.18256 | -0.66734 |
| C            | 3.95736  | 0.16243  | 0.11610  | C           | 3.59385  | -0.43660 | 0.72133  |
| C            | 6.47757  | -0.95988 | -0.33223 | C           | 5.74947  | -1.51170 | -0.70129 |
| C            | 5.10854  | 0.92591  | 0.31624  | C           | 4.81616  | 0.23761  | 0.69095  |
| C            | 6.35421  | 0.36579  | 0.09658  | C           | 5.87654  | -0.29641 | -0.01276 |
| H            | 5.39858  | -2.73139 | -0.89729 | H           | 4.41809  | -3.12452 | -1.18475 |
| H            | 7.45716  | -1.39084 | -0.49712 | H           | 6.58956  | -1.91460 | -1.25275 |
| H            | 5.00234  | 1.94876  | 0.65479  | H           | 4.90291  | 1.17960  | 1.21580  |
| H            | 7.24188  | 0.96407  | 0.26661  | H           | 6.81926  | 0.23808  | -0.03621 |
| C            | 2.86093  | -1.94834 | -0.64596 | C           | 2.19422  | -2.38588 | 0.08573  |
| O            | 2.88793  | -3.05719 | -1.18584 | O           | 1.99848  | -3.49594 | -0.38095 |
| C            | 1.60864  | -1.26355 | -0.32339 | C           | 1.04601  | -1.63703 | 0.75348  |
| C            | 1.57633  | 0.01290  | 0.44953  | C           | 1.24618  | -0.22753 | 1.25515  |
| O            | 2.77905  | 0.78639  | 0.35917  | O           | 2.61976  | 0.12526  | 1.46999  |
| O            | 0.48630  | -1.74130 | -0.62877 | O           | -0.07283 | -2.13558 | 0.81721  |
| C            | 1.28619  | -0.40347 | 1.87058  | C           | 0.48141  | -0.01004 | 2.52574  |
| C            | 2.12629  | -1.10343 | 2.72529  | C           | 0.80076  | -0.50812 | 3.77550  |
| C            | -0.00915 | -0.01115 | 2.23938  | C           | -0.64726 | 0.78174  | 2.28902  |
| C            | 1.68610  | -1.39466 | 4.00961  | C           | -0.02190 | -0.19220 | 4.85309  |
| C            | -0.43942 | -0.31920 | 3.53859  | C           | -1.45908 | 1.10112  | 3.38281  |
| C            | 0.40684  | -0.99937 | 4.40294  | C           | -1.14037 | 0.61217  | 4.64579  |
| H            | 3.12000  | -1.39613 | 2.40948  | H           | 1.68855  | -1.11410 | 3.91713  |
| H            | 2.33488  | -1.91427 | 4.70409  | H           | 0.21325  | -0.55617 | 5.84587  |
| H            | -1.41078 | -0.01797 | 3.89664  | H           | -2.32296 | 1.73857  | 3.27226  |
| H            | 0.06634  | -1.21767 | 5.40889  | H           | -1.77277 | 0.87430  | 5.48673  |
| C            | -2.59085 | 0.47624  | -2.05018 | C           | -1.71283 | 0.14457  | -2.44376 |
| C            | -1.96448 | -0.63548 | -2.66262 | C           | -1.23270 | -1.18999 | -2.59115 |
| C            | -3.26672 | 0.24944  | -0.83421 | C           | -2.80574 | 0.36306  | -1.55897 |
| C            | -2.09055 | -1.92784 | -2.09430 | C           | -1.80216 | -2.22201 | -1.83827 |
| C            | -3.38566 | -1.04421 | -0.26760 | C           | -3.43636 | -0.70165 | -0.86687 |
| C            | -2.82783 | -2.16686 | -0.90955 | C           | -2.90494 | -1.99412 | -0.95570 |
| H            | -1.40674 | -0.51149 | -3.58173 | H           | -0.41479 | -1.40519 | -3.26679 |
| H            | -3.69361 | 1.09109  | -0.30980 | H           | -3.17899 | 1.36908  | -1.43294 |

|    |          |          |          |    |          |          |          |
|----|----------|----------|----------|----|----------|----------|----------|
| H  | -1.55822 | -2.74398 | -2.56143 | H  | -1.36151 | -3.20714 | -1.88854 |
| H  | -3.90785 | -1.16741 | 0.67197  | H  | -4.27808 | -0.50414 | -0.21578 |
| C  | -2.57566 | 1.83886  | -2.67104 | C  | -1.20049 | 1.26745  | -3.29407 |
| H  | -2.53720 | 2.61609  | -1.90872 | H  | -1.24743 | 2.21563  | -2.75995 |
| H  | -1.72683 | 1.96648  | -3.33893 | H  | -0.17276 | 1.10003  | -3.60816 |
| H  | -3.49075 | 1.98389  | -3.25322 | H  | -1.81884 | 1.35667  | -4.19288 |
| C  | -2.99588 | -3.54780 | -0.31900 | C  | -3.56100 | -3.12228 | -0.18561 |
| H  | -3.13726 | -3.40570 | 0.75706  | H  | -3.99119 | -2.67217 | 0.71456  |
| C  | -1.77899 | -4.45322 | -0.51662 | C  | -2.60360 | -4.23036 | 0.25381  |
| C  | -4.26562 | -4.20341 | -0.88414 | C  | -4.71219 | -3.70491 | -1.02095 |
| H  | -5.14865 | -3.58815 | -0.70167 | H  | -5.44068 | -2.93754 | -1.28884 |
| H  | -4.17458 | -4.35313 | -1.96302 | H  | -4.33140 | -4.14681 | -1.94548 |
| H  | -4.42854 | -5.17891 | -0.42085 | H  | -5.23067 | -4.48780 | -0.46271 |
| H  | -1.64747 | -4.72805 | -1.56577 | H  | -2.22545 | -4.79562 | -0.60157 |
| H  | -1.91383 | -5.37997 | 0.04431  | H  | -3.13141 | -4.93731 | 0.89723  |
| H  | -0.86309 | -3.97040 | -0.17541 | H  | -1.75049 | -3.83177 | 0.79940  |
| Ru | -1.16829 | -0.57995 | -0.54701 | Ru | -1.17523 | -0.51688 | -0.40286 |
| C  | 0.30450  | 0.86215  | 0.04061  | C  | 0.49667  | 0.66966  | 0.18521  |
| C  | -0.63296 | 0.77938  | 1.15636  | C  | -0.70479 | 1.19210  | 0.86342  |
| C  | 0.66780  | 2.03340  | -0.81481 | C  | 1.46340  | 1.36848  | -0.71098 |
| C  | 1.10278  | 3.23442  | -0.24528 | C  | 2.11978  | 2.52513  | -0.27281 |
| C  | 0.75678  | 1.89734  | -2.19940 | C  | 1.87009  | 0.80838  | -1.92092 |
| C  | 1.55340  | 4.28231  | -1.03691 | C  | 3.11219  | 3.12144  | -1.03753 |
| C  | 1.21368  | 2.93979  | -2.99808 | C  | 2.86869  | 1.39679  | -2.68974 |
| C  | 1.60435  | 4.14154  | -2.42032 | C  | 3.48915  | 2.56034  | -2.25424 |
| H  | 1.09793  | 3.34254  | 0.83256  | H  | 1.85152  | 2.95333  | 0.68539  |
| H  | 0.46233  | 0.95784  | -2.64839 | H  | 1.39927  | -0.10648 | -2.25378 |
| H  | 1.87488  | 5.20766  | -0.57243 | H  | 3.60055  | 4.02053  | -0.67901 |
| H  | 1.26630  | 2.81070  | -4.07326 | H  | 3.16370  | 0.94111  | -3.62805 |
| H  | 1.95649  | 4.95789  | -3.04013 | H  | 4.26620  | 3.02295  | -2.85153 |
| C  | -1.77716 | 1.68473  | 1.46066  | C  | -1.49821 | 2.39575  | 0.48639  |
| C  | -1.88610 | 2.99274  | 0.97558  | C  | -1.01510 | 3.44590  | -0.30151 |
| C  | -2.84611 | 1.20997  | 2.24006  | C  | -2.83516 | 2.48939  | 0.91194  |
| C  | -2.99083 | 3.78728  | 1.26736  | C  | -1.81524 | 4.53754  | -0.62959 |
| C  | -3.94379 | 2.00179  | 2.53892  | C  | -3.62981 | 3.58034  | 0.59743  |
| C  | -4.02457 | 3.30497  | 2.05743  | C  | -3.12367 | 4.62131  | -0.17630 |
| H  | -1.11234 | 3.40387  | 0.35176  | H  | -0.00606 | 3.42035  | -0.67525 |
| H  | -2.84855 | 0.18111  | 2.56769  | H  | -3.27469 | 1.66438  | 1.45487  |
| H  | -3.03576 | 4.79506  | 0.86977  | H  | -1.40166 | 5.32990  | -1.24374 |
| H  | -4.74976 | 1.59148  | 3.13689  | H  | -4.65722 | 3.60935  | 0.94310  |
| H  | -4.88291 | 3.92566  | 2.28537  | H  | -3.74353 | 5.47357  | -0.42846 |



| <b>INT-8</b> |          |          |          | <b>TS-8</b> |          |          |          |
|--------------|----------|----------|----------|-------------|----------|----------|----------|
| C            | 2.95136  | -1.75513 | 0.22649  | C           | 2.74981  | -1.92206 | 0.22619  |
| C            | 3.84017  | -2.50850 | -0.54836 | C           | 3.74197  | -2.40591 | -0.63333 |
| C            | 3.39060  | -0.53710 | 0.76473  | C           | 3.02279  | -0.79933 | 1.01216  |
| C            | 5.13043  | -2.07250 | -0.78133 | C           | 4.97554  | -1.78470 | -0.69759 |
| C            | 4.69750  | -0.10468 | 0.55253  | C           | 4.27065  | -0.19353 | 0.98223  |
| C            | 5.55709  | -0.86718 | -0.21845 | C           | 5.24055  | -0.68704 | 0.12413  |
| H            | 3.48743  | -3.44896 | -0.95309 | H           | 3.52603  | -3.28246 | -1.23129 |
| H            | 5.80697  | -2.66118 | -1.38842 | H           | 5.73822  | -2.15549 | -1.37117 |
| H            | 5.01154  | 0.83733  | 0.98362  | H           | 4.45424  | 0.66976  | 1.60757  |
| H            | 6.56881  | -0.51800 | -0.38975 | H           | 6.21081  | -0.20616 | 0.08636  |
| C            | 1.59911  | -2.26969 | 0.52444  | C           | 1.48481  | -2.64371 | 0.41126  |
| O            | 1.29608  | -3.45021 | 0.37417  | O           | 1.32757  | -3.80855 | 0.08475  |
| C            | 0.66721  | -1.26172 | 1.07317  | C           | 0.32337  | -1.89571 | 1.07745  |
| C            | 1.20028  | 0.13876  | 1.42784  | C           | 0.76995  | -0.11225 | 1.46143  |
| O            | 2.60883  | 0.25331  | 1.55262  | O           | 2.09217  | -0.33036 | 1.90455  |
| O            | -0.49955 | -1.55631 | 1.56766  | O           | -0.40738 | -2.45305 | 1.86353  |
| C            | 0.49095  | 0.65398  | 2.64175  | C           | -0.15604 | 0.25372  | 2.57100  |
| C            | 0.83358  | 0.51070  | 3.96944  | C           | -0.13442 | -0.11747 | 3.89420  |
| C            | -0.68287 | 1.29727  | 2.23479  | C           | -1.15489 | 1.07535  | 2.03142  |
| C            | -0.01677 | 1.04624  | 4.93859  | C           | -1.15324 | 0.35153  | 4.73343  |
| C            | -1.53073 | 1.81906  | 3.20628  | C           | -2.15896 | 1.54079  | 2.86853  |
| C            | -1.18614 | 1.69158  | 4.55285  | C           | -2.14887 | 1.16820  | 4.21896  |
| H            | 1.75063  | 0.00691  | 4.25177  | H           | 0.65330  | -0.75345 | 4.27910  |
| H            | 0.23769  | 0.96544  | 5.98877  | H           | -1.16066 | 0.07722  | 5.78145  |
| H            | -2.43390 | 2.34919  | 2.94124  | H           | -2.92952 | 2.20801  | 2.51034  |
| H            | -1.83900 | 2.11454  | 5.30799  | H           | -2.93036 | 1.53788  | 4.87324  |
| C            | -1.18628 | -0.41858 | -2.62166 | C           | -0.22131 | -1.12872 | -2.74345 |
| C            | -0.64158 | -1.68454 | -2.31814 | C           | -0.36397 | -2.32999 | -2.03989 |
| C            | -2.33884 | -0.02073 | -1.91078 | C           | -1.22728 | -0.15159 | -2.53541 |
| C            | -1.30565 | -2.56049 | -1.42108 | C           | -1.50117 | -2.59423 | -1.22849 |
| C            | -3.01806 | -0.89692 | -1.03249 | C           | -2.36980 | -0.43614 | -1.74510 |
| C            | -2.52992 | -2.20173 | -0.81248 | C           | -2.56688 | -1.69231 | -1.11930 |
| H            | 0.27322  | -2.01111 | -2.79630 | H           | 0.41182  | -3.07982 | -2.10059 |
| H            | -2.72331 | 0.97850  | -2.05516 | H           | -1.13504 | 0.82355  | -2.99575 |
| H            | -0.84285 | -3.50503 | -1.18120 | H           | -1.52076 | -3.52466 | -0.67950 |
| H            | -3.91351 | -0.56185 | -0.52693 | H           | -3.11450 | 0.33756  | -1.61853 |
| C            | -0.60106 | 0.47846  | -3.66937 | C           | 0.90682  | -0.90802 | -3.70358 |
| H            | -0.58627 | 1.51631  | -3.33914 | H           | 1.10726  | 0.15357  | -3.84512 |
| H            | 0.41091  | 0.18357  | -3.93647 | H           | 1.81939  | -1.39848 | -3.36352 |
| H            | -1.21707 | 0.42375  | -4.57184 | H           | 0.64973  | -1.32656 | -4.68131 |

|              |          |          |          |              |          |          |          |
|--------------|----------|----------|----------|--------------|----------|----------|----------|
| C            | -3.29207 | -3.13533 | 0.09988  | C            | -3.85861 | -1.98433 | -0.39208 |
| H            | -3.71225 | -2.51260 | 0.89585  | H            | -4.20879 | -1.02887 | 0.01207  |
| C            | -2.42978 | -4.21810 | 0.74523  | C            | -3.70261 | -2.95868 | 0.77465  |
| C            | -4.46008 | -3.75632 | -0.68407 | C            | -4.91419 | -2.48590 | -1.39065 |
| H            | -5.11773 | -2.99299 | -1.10395 | H            | -5.06453 | -1.77486 | -2.20542 |
| H            | -4.08708 | -4.37242 | -1.50610 | H            | -4.60738 | -3.43975 | -1.82746 |
| H            | -5.05536 | -4.39406 | -0.02749 | H            | -5.87294 | -2.63569 | -0.88933 |
| H            | -2.09049 | -4.94947 | 0.00730  | H            | -3.44040 | -3.96107 | 0.42696  |
| H            | -3.01842 | -4.75900 | 1.48869  | H            | -4.64726 | -3.04188 | 1.31549  |
| H            | -1.55525 | -3.78740 | 1.23122  | H            | -2.93003 | -2.62811 | 1.46880  |
| Ru           | -0.85854 | -0.66640 | -0.30111 | Ru           | -0.57285 | -0.56577 | -0.44682 |
| C            | 0.54829  | 0.92081  | 0.25175  | C            | 0.55875  | 0.90854  | 0.36593  |
| C            | -0.72118 | 1.37522  | 0.74505  | C            | -0.82933 | 1.33543  | 0.59585  |
| C            | 1.50024  | 1.56358  | -0.69131 | C            | 1.70729  | 1.71735  | -0.11292 |
| C            | 1.98200  | 2.83963  | -0.37417 | C            | 2.16779  | 2.77910  | 0.67200  |
| C            | 2.05577  | 0.90147  | -1.78230 | C            | 2.36771  | 1.43219  | -1.30419 |
| C            | 2.96101  | 3.44451  | -1.14966 | C            | 3.25978  | 3.53533  | 0.26817  |
| C            | 3.03855  | 1.50246  | -2.56015 | C            | 3.45713  | 2.18977  | -1.71555 |
| C            | 3.49139  | 2.77825  | -2.25075 | C            | 3.90733  | 3.24393  | -0.92953 |
| H            | 1.58363  | 3.35741  | 0.49047  | H            | 1.66277  | 3.01139  | 1.60244  |
| H            | 1.72355  | -0.10018 | -2.00964 | H            | 2.02499  | 0.59756  | -1.89570 |
| H            | 3.31432  | 4.43635  | -0.89160 | H            | 3.60629  | 4.35534  | 0.88683  |
| H            | 3.45445  | 0.96778  | -3.40622 | H            | 3.95945  | 1.95177  | -2.64601 |
| H            | 4.25590  | 3.24953  | -2.85732 | H            | 4.75815  | 3.83614  | -1.24584 |
| C            | -1.66832 | 2.30252  | 0.07156  | C            | -1.54480 | 2.37385  | -0.18190 |
| C            | -1.29043 | 3.18945  | -0.94180 | C            | -0.89811 | 3.27096  | -1.04159 |
| C            | -3.02332 | 2.27870  | 0.43598  | C            | -2.94376 | 2.45930  | -0.09913 |
| C            | -2.22457 | 4.01371  | -1.56209 | C            | -1.61410 | 4.21659  | -1.76698 |
| C            | -3.95355 | 3.10339  | -0.17716 | C            | -3.65826 | 3.40647  | -0.81880 |
| C            | -3.55983 | 3.98070  | -1.18396 | C            | -2.99681 | 4.29707  | -1.65782 |
| H            | -0.26252 | 3.23911  | -1.26164 | H            | 0.17423  | 3.23662  | -1.14689 |
| H            | -3.35944 | 1.56594  | 1.17672  | H            | -3.48404 | 1.75040  | 0.51344  |
| H            | -1.89911 | 4.68763  | -2.34653 | H            | -1.08143 | 4.89835  | -2.42054 |
| H            | -4.99423 | 3.05168  | 0.12219  | H            | -4.73837 | 3.44124  | -0.73131 |
| H            | -4.28558 | 4.62319  | -1.66828 | H            | -3.55187 | 5.03752  | -2.22158 |
| <b>TS-8a</b> |          |          |          | <b>INT-9</b> |          |          |          |
| C            | 3.24840  | -0.23922 | 0.06524  | C            | 3.31648  | -0.90320 | 0.16391  |
| C            | 4.58947  | -0.33211 | -0.34339 | C            | 4.46151  | -1.47943 | -0.42269 |
| C            | 3.00121  | -0.25064 | 1.44799  | C            | 3.26577  | 0.50609  | 0.19687  |
| C            | 5.63939  | -0.43262 | 0.54840  | C            | 5.48915  | -0.73051 | -0.95893 |
| C            | 4.06164  | -0.33659 | 2.35267  | C            | 4.32754  | 1.26271  | -0.30525 |

|    |          |          |          |   |          |          |          |
|----|----------|----------|----------|---|----------|----------|----------|
| C  | 5.36880  | -0.42891 | 1.91446  | C | 5.42578  | 0.65943  | -0.88383 |
| H  | 4.77854  | -0.31988 | -1.40840 | H | 4.51693  | -2.55956 | -0.44622 |
| H  | 6.65758  | -0.51022 | 0.18689  | H | 6.33705  | -1.22194 | -1.41953 |
| H  | 3.82565  | -0.32670 | 3.40957  | H | 4.25230  | 2.34067  | -0.23652 |
| H  | 6.17300  | -0.50224 | 2.63725  | H | 6.22789  | 1.27050  | -1.28055 |
| C  | 2.23656  | -0.16250 | -1.05336 | C | 2.38037  | -1.93124 | 0.75454  |
| O  | 2.62211  | 0.30055  | -2.11991 | O | 2.85959  | -2.92580 | 1.25360  |
| C  | 0.81051  | -1.76496 | 0.56678  | C | 0.80347  | -1.89808 | 0.57075  |
| C  | 0.53930  | -0.31910 | 1.47209  | C | 1.05648  | 0.67111  | 1.00001  |
| O  | 1.79165  | -0.11007 | 2.08643  | O | 2.26771  | 1.27361  | 0.72232  |
| O  | 1.20626  | -2.73419 | 1.12282  | O | 0.20912  | -2.84640 | 1.02058  |
| C  | -0.52214 | -0.76840 | 2.41176  | C | 0.84953  | 0.03715  | 2.31768  |
| C  | -0.48953 | -1.75654 | 3.38360  | C | 1.74007  | -0.30977 | 3.30889  |
| C  | -1.70829 | -0.07055 | 2.11736  | C | -0.54230 | -0.16504 | 2.44532  |
| C  | -1.65947 | -2.04008 | 4.07996  | C | 1.23428  | -0.87833 | 4.48677  |
| C  | -2.88621 | -0.38428 | 2.80135  | C | -1.02983 | -0.72175 | 3.61209  |
| C  | -2.84786 | -1.36519 | 3.78187  | C | -0.12871 | -1.07546 | 4.63033  |
| H  | 0.42851  | -2.28450 | 3.60312  | H | 2.80333  | -0.13853 | 3.19069  |
| H  | -1.65037 | -2.78873 | 4.86322  | H | 1.91125  | -1.15292 | 5.28668  |
| H  | -3.80937 | 0.13704  | 2.58380  | H | -2.08761 | -0.86366 | 3.77823  |
| H  | -3.75029 | -1.60792 | 4.33100  | H | -0.51534 | -1.50205 | 5.54874  |
| C  | -0.43942 | -0.19931 | -3.29178 | C | 0.97429  | -0.22404 | -2.73034 |
| C  | 0.35481  | -1.37373 | -3.12540 | C | 0.85365  | -1.58099 | -2.36702 |
| C  | -1.62150 | -0.12621 | -2.57000 | C | -0.21209 | 0.54717  | -2.75265 |
| C  | -0.09959 | -2.47574 | -2.37946 | C | -0.41137 | -2.16123 | -2.08407 |
| C  | -2.05189 | -1.20838 | -1.75578 | C | -1.44492 | -0.01086 | -2.39816 |
| C  | -1.34673 | -2.40989 | -1.69399 | C | -1.58007 | -1.39218 | -2.08034 |
| H  | 1.30980  | -1.43571 | -3.62744 | H | 1.73922  | -2.20208 | -2.33176 |
| H  | -2.22874 | 0.76962  | -2.61208 | H | -0.16009 | 1.59875  | -2.99974 |
| H  | 0.48190  | -3.38758 | -2.35760 | H | -0.44997 | -3.20207 | -1.79922 |
| H  | -2.96641 | -1.09813 | -1.19211 | H | -2.32234 | 0.62041  | -2.36437 |
| C  | 0.06153  | 0.91946  | -4.14840 | C | 2.28950  | 0.35101  | -3.15668 |
| H  | 1.04778  | 1.23330  | -3.79897 | H | 2.37006  | 1.40512  | -2.89407 |
| C  | -1.83448 | -3.62637 | -0.93861 | H | 3.12113  | -0.18354 | -2.70232 |
| Ru | 0.32489  | -0.80380 | -0.92006 | H | 2.38968  | 0.27314  | -4.24353 |
| C  | -0.08791 | 0.91681  | 0.79335  | C | -2.94849 | -1.95590 | -1.78640 |
| C  | -1.42001 | 0.97744  | 1.15562  | H | -3.47847 | -1.19154 | -1.21467 |
| C  | 0.66636  | 2.07050  | 0.23320  | C | -2.91611 | -3.23227 | -0.94975 |
| C  | 1.70345  | 2.66449  | 0.95894  | C | -3.71333 | -2.17150 | -3.10202 |
| C  | 0.29173  | 2.65765  | -0.97915 | H | -3.78292 | -1.25028 | -3.68366 |
| C  | 2.36132  | 3.78761  | 0.47005  | H | -3.21807 | -2.92498 | -3.71985 |

|             |          |          |          |               |          |          |          |
|-------------|----------|----------|----------|---------------|----------|----------|----------|
| C           | 0.94009  | 3.78243  | -1.46255 | H             | -4.72788 | -2.51738 | -2.89479 |
| C           | 1.98675  | 4.35075  | -0.74295 | H             | -2.51506 | -4.07568 | -1.51806 |
| H           | 1.98836  | 2.25657  | 1.91739  | H             | -3.92953 | -3.49797 | -0.64539 |
| H           | -0.51946 | 2.22489  | -1.54507 | H             | -2.30829 | -3.10391 | -0.05391 |
| H           | 3.16521  | 4.22767  | 1.04886  | Ru            | -0.01967 | -0.43668 | -0.59798 |
| H           | 0.63188  | 4.21475  | -2.40739 | C             | -0.19772 | 1.27954  | 0.60830  |
| H           | 2.50112  | 5.22559  | -1.12303 | C             | -1.18336 | 0.38531  | 1.21299  |
| C           | -2.41181 | 1.99175  | 0.75678  | C             | -0.29135 | 2.69221  | 0.18516  |
| C           | -2.17812 | 3.35823  | 0.94890  | C             | -1.09832 | 3.56515  | 0.92437  |
| C           | -3.63614 | 1.60015  | 0.20438  | C             | 0.51056  | 3.23195  | -0.82334 |
| C           | -3.13196 | 4.29937  | 0.58685  | C             | -1.13248 | 4.92301  | 0.63555  |
| C           | -4.58756 | 2.54277  | -0.16660 | C             | 0.47992  | 4.58988  | -1.11148 |
| C           | -4.33799 | 3.89708  | 0.02152  | C             | -0.34851 | 5.44167  | -0.38900 |
| H           | -1.24601 | 3.68209  | 1.39178  | H             | -1.69985 | 3.17394  | 1.73478  |
| H           | -3.84467 | 0.54749  | 0.06188  | H             | 1.17237  | 2.58265  | -1.37560 |
| H           | -2.93405 | 5.35251  | 0.75007  | H             | -1.76979 | 5.57810  | 1.21831  |
| H           | -5.52613 | 2.21695  | -0.60002 | H             | 1.10793  | 4.98376  | -1.90228 |
| H           | -5.08007 | 4.63363  | -0.26350 | H             | -0.37640 | 6.50068  | -0.61686 |
| H           | -0.94147 | -4.13442 | -0.56174 | C             | -2.63956 | 0.38075  | 0.97860  |
| C           | -2.54148 | -4.58011 | -1.91542 | C             | -3.29192 | 1.33533  | 0.18220  |
| H           | -3.44428 | -4.11685 | -2.32116 | C             | -3.42686 | -0.66033 | 1.49642  |
| H           | -1.89495 | -4.85073 | -2.75237 | C             | -4.65947 | 1.27288  | -0.04779 |
| H           | -2.83265 | -5.49860 | -1.40190 | C             | -4.79504 | -0.72005 | 1.26976  |
| C           | -2.72837 | -3.30137 | 0.25639  | C             | -5.42657 | 0.25218  | 0.50332  |
| H           | -2.24791 | -2.60665 | 0.94426  | H             | -2.72689 | 2.13379  | -0.27141 |
| H           | -3.68122 | -2.86832 | -0.05730 | H             | -2.95687 | -1.46141 | 2.04613  |
| H           | -2.95571 | -4.21675 | 0.80519  | H             | -5.12834 | 2.03091  | -0.66517 |
| H           | 0.16620  | 0.59302  | -5.18653 | H             | -5.36682 | -1.54232 | 1.68462  |
| H           | -0.61460 | 1.77363  | -4.12557 | H             | -6.49446 | 0.20804  | 0.32607  |
| <b>TS-9</b> |          |          |          | <b>INT-10</b> |          |          |          |
| C           | -1.53720 | 2.86639  | -1.01578 | C             | -1.54623 | -2.78886 | -0.10062 |
| C           | -1.61002 | 4.24482  | -0.73870 | C             | -2.30593 | -3.91169 | 0.25745  |
| C           | -0.42451 | 2.37876  | -1.73440 | C             | -1.50356 | -2.41869 | -1.45197 |
| C           | -0.63647 | 5.11669  | -1.17051 | C             | -2.98771 | -4.66333 | -0.67949 |
| C           | 0.53131  | 3.27773  | -2.20752 | C             | -2.19605 | -3.17704 | -2.40158 |
| C           | 0.43382  | 4.62662  | -1.92484 | C             | -2.92486 | -4.28833 | -2.02223 |
| H           | -2.46479 | 4.59993  | -0.17760 | H             | -2.33490 | -4.17828 | 1.30632  |
| H           | -0.70438 | 6.17249  | -0.93927 | H             | -3.56095 | -5.53086 | -0.37630 |
| H           | 1.36476  | 2.88281  | -2.77304 | H             | -2.15371 | -2.86224 | -3.43709 |
| H           | 1.20116  | 5.30363  | -2.28168 | H             | -3.45100 | -4.86351 | -2.77549 |
| C           | -2.66288 | 2.02995  | -0.59117 | C             | -0.79182 | -2.08806 | 0.97155  |

|    |          |          |          |    |          |          |          |
|----|----------|----------|----------|----|----------|----------|----------|
| O  | -3.67424 | 2.47078  | -0.06627 | O  | -1.15589 | -2.18956 | 2.13464  |
| C  | -2.63859 | 0.45936  | -0.86166 | C  | 1.42693  | -2.45469 | -0.42902 |
| C  | -0.00533 | 0.03073  | -1.11683 | C  | -0.22386 | -0.34343 | -1.16304 |
| O  | -0.26179 | 1.07628  | -2.09982 | O  | -0.86382 | -1.33961 | -1.96773 |
| O  | -3.36150 | 0.01578  | -1.71587 | O  | 1.79233  | -3.36367 | -1.04472 |
| C  | 0.03386  | -1.27093 | -1.82994 | C  | 0.81170  | 0.37128  | -1.96831 |
| C  | -0.83157 | -1.80256 | -2.77143 | C  | 1.81385  | -0.12193 | -2.78558 |
| C  | 1.19887  | -1.96344 | -1.44827 | C  | 0.65127  | 1.75762  | -1.78480 |
| C  | -0.55809 | -3.06541 | -3.29613 | C  | 2.69437  | 0.77640  | -3.38926 |
| C  | 1.42573  | -3.25544 | -1.91887 | C  | 1.53960  | 2.64954  | -2.37500 |
| C  | 0.54318  | -3.79552 | -2.85170 | C  | 2.56733  | 2.14686  | -3.17324 |
| H  | -1.70956 | -1.25371 | -3.08147 | H  | 1.91448  | -1.18687 | -2.95478 |
| H  | -1.22118 | -3.49283 | -4.03926 | H  | 3.48370  | 0.40457  | -4.03205 |
| H  | 2.28607  | -3.82584 | -1.59311 | H  | 1.42864  | 3.71835  | -2.24202 |
| H  | 0.72238  | -4.78986 | -3.24416 | H  | 3.26221  | 2.83158  | -3.64547 |
| C  | -2.33874 | -1.90007 | 1.24391  | C  | 0.99337  | 0.17957  | 2.95316  |
| C  | -0.92945 | -1.96699 | 1.40708  | C  | 1.84298  | -0.95001 | 2.89716  |
| C  | -3.00703 | -0.83341 | 1.91360  | C  | 1.22190  | 1.20175  | 2.02946  |
| C  | -0.24171 | -1.14172 | 2.34971  | C  | 2.92090  | -0.99276 | 2.00701  |
| C  | -2.28998 | 0.08546  | 2.68652  | C  | 2.32245  | 1.16523  | 1.14784  |
| C  | -0.90149 | -0.10875 | 2.99194  | C  | 3.21407  | 0.09516  | 1.14260  |
| H  | -0.36655 | -2.71866 | 0.87609  | H  | 1.66953  | -1.78340 | 3.56588  |
| H  | -4.06766 | -0.68474 | 1.76295  | H  | 0.56338  | 2.06043  | 2.01025  |
| H  | 0.81822  | -1.28874 | 2.50111  | H  | 3.56321  | -1.86414 | 2.01269  |
| H  | -2.80865 | 0.93420  | 3.11360  | H  | 2.48011  | 1.98772  | 0.46264  |
| C  | -3.14744 | -2.92468 | 0.47600  | C  | -0.12532 | 0.23607  | 3.94498  |
| H  | -3.73467 | -2.37653 | -0.26715 | H  | -0.60145 | 1.21558  | 3.95407  |
| C  | -0.21293 | 0.81573  | 3.94757  | H  | -0.87068 | -0.52220 | 3.69689  |
| H  | -0.50534 | 1.85208  | 3.76952  | H  | 0.24660  | 0.02528  | 4.95009  |
| Ru | -1.42131 | 0.01438  | 0.54675  | C  | 4.46277  | 0.12801  | 0.28844  |
| C  | 1.35342  | 0.11817  | -0.46040 | H  | 4.33965  | 0.95605  | -0.41475 |
| C  | 2.00181  | -1.07996 | -0.59456 | C  | 4.68219  | -1.14708 | -0.52776 |
| C  | 1.89536  | 1.35094  | 0.12806  | C  | 5.68337  | 0.43151  | 1.17267  |
| C  | 1.13976  | 2.17321  | 0.96951  | H  | 5.55102  | 1.36125  | 1.72914  |
| C  | 3.19087  | 1.77246  | -0.20257 | H  | 5.85304  | -0.37226 | 1.89364  |
| C  | 1.64594  | 3.36561  | 1.46442  | H  | 6.58074  | 0.52618  | 0.55800  |
| C  | 3.70157  | 2.96420  | 0.28974  | H  | 4.81334  | -2.02193 | 0.11297  |
| C  | 2.93229  | 3.76847  | 1.12523  | H  | 5.58479  | -1.04747 | -1.13372 |
| H  | 0.13636  | 1.86542  | 1.24306  | H  | 3.84442  | -1.33393 | -1.19694 |
| H  | 3.79083  | 1.16481  | -0.86702 | Ru | 0.86802  | -1.03777 | 0.55993  |
| H  | 1.03248  | 3.98335  | 2.10937  | C  | -1.12625 | 0.77498  | -0.68540 |

|              |          |          |          |               |          |          |          |
|--------------|----------|----------|----------|---------------|----------|----------|----------|
| H            | 4.70292  | 3.27270  | 0.01176  | C             | -0.56355 | 1.97922  | -0.98621 |
| H            | 3.33053  | 4.70243  | 1.50392  | C             | -2.39570 | 0.56571  | 0.03767  |
| C            | 3.29385  | -1.45900 | 0.00143  | C             | -2.56948 | 1.04700  | 1.33759  |
| C            | 3.59679  | -1.15647 | 1.33459  | C             | -3.46664 | -0.09410 | -0.57309 |
| C            | 4.26442  | -2.12609 | -0.75719 | C             | -3.76582 | 0.85975  | 2.01598  |
| C            | 4.81753  | -1.51127 | 1.89080  | C             | -4.66560 | -0.27992 | 0.10214  |
| C            | 5.48880  | -2.47738 | -0.20250 | C             | -4.81851 | 0.19089  | 1.40154  |
| C            | 5.77065  | -2.17544 | 1.12507  | H             | -1.75747 | 1.57496  | 1.81672  |
| H            | 2.87020  | -0.62754 | 1.93643  | H             | -3.36285 | -0.45296 | -1.58795 |
| H            | 4.06868  | -2.34798 | -1.79831 | H             | -3.87571 | 1.23484  | 3.02694  |
| H            | 5.02612  | -1.26887 | 2.92659  | H             | -5.48373 | -0.79307 | -0.38991 |
| H            | 6.22718  | -2.98511 | -0.81260 | H             | -5.75308 | 0.04195  | 1.92978  |
| H            | 6.72435  | -2.45256 | 1.55867  | C             | -1.06175 | 3.31452  | -0.61204 |
| C            | -2.29451 | -3.95961 | -0.24995 | C             | -0.20089 | 4.26360  | -0.04820 |
| H            | -1.75241 | -4.59040 | 0.45990  | C             | -2.39923 | 3.67279  | -0.81612 |
| H            | -2.93597 | -4.61276 | -0.84412 | C             | -0.66454 | 5.52249  | 0.31441  |
| H            | -1.57693 | -3.50011 | -0.92390 | C             | -2.86075 | 4.93276  | -0.46095 |
| C            | -4.12481 | -3.62602 | 1.43461  | C             | -1.99666 | 5.86263  | 0.10889  |
| H            | -4.73437 | -4.34456 | 0.88339  | H             | 0.83928  | 4.01247  | 0.11901  |
| H            | -3.58044 | -4.17069 | 2.21041  | H             | -3.07682 | 2.95742  | -1.26319 |
| H            | -4.79884 | -2.92265 | 1.92529  | H             | 0.01773  | 6.23912  | 0.75716  |
| H            | -0.49536 | 0.57082  | 4.97575  | H             | -3.89913 | 5.19176  | -0.63339 |
| H            | 0.87039  | 0.74317  | 3.86433  | H             | -2.35817 | 6.84583  | 0.38650  |
| <b>TS-10</b> |          |          |          | <b>INT-11</b> |          |          |          |
| C            | 0.35493  | 2.72373  | 0.41934  | C             | 1.91558  | 2.92005  | -0.07154 |
| C            | 0.22840  | 3.79156  | 1.29782  | C             | 2.20993  | 4.19268  | 0.41441  |
| C            | 0.60182  | 2.96445  | -0.92124 | C             | 2.13849  | 2.59611  | -1.40788 |
| C            | 0.32638  | 5.08982  | 0.80673  | C             | 2.72410  | 5.12943  | -0.46509 |
| C            | 0.70663  | 4.24479  | -1.43594 | C             | 2.65896  | 3.52277  | -2.30408 |
| C            | 0.56122  | 5.31016  | -0.55074 | C             | 2.94346  | 4.78850  | -1.80871 |
| H            | 0.04980  | 3.60350  | 2.34993  | H             | 2.03102  | 4.43188  | 1.45586  |
| H            | 0.22521  | 5.93300  | 1.47943  | H             | 2.95941  | 6.12943  | -0.12279 |
| H            | 0.90357  | 4.40318  | -2.48916 | H             | 2.83409  | 3.26306  | -3.34045 |
| H            | 0.64139  | 6.32418  | -0.92463 | H             | 3.34837  | 5.53533  | -2.48224 |
| C            | 0.27042  | 1.27411  | 0.73808  | C             | 1.39890  | 1.72840  | 0.58568  |
| O            | 0.76008  | 0.79260  | 1.76729  | O             | 1.19729  | 1.53278  | 1.76543  |
| C            | -2.25379 | 1.79591  | -0.44033 | C             | -1.48209 | 2.57642  | 0.40795  |
| C            | 0.72599  | 0.65407  | -0.94840 | C             | 1.22342  | 0.67306  | -0.53030 |
| O            | 0.73636  | 1.84687  | -1.70448 | O             | 1.83262  | 1.31570  | -1.72352 |
| O            | -2.71456 | 2.75088  | -0.90567 | O             | -1.23751 | 3.71218  | 0.43866  |
| C            | -0.19447 | -0.39244 | -1.47731 | C             | -0.19513 | 0.22482  | -0.91614 |

|    |          |          |          |    |          |          |          |
|----|----------|----------|----------|----|----------|----------|----------|
| C  | -1.25792 | -0.29928 | -2.39095 | C  | -1.14616 | 0.94498  | -1.71929 |
| C  | 0.42546  | -1.65415 | -1.23076 | C  | -0.08852 | -1.20847 | -1.14769 |
| C  | -1.81661 | -1.47496 | -2.88215 | C  | -1.99372 | 0.20391  | -2.60934 |
| C  | -0.17629 | -2.82005 | -1.69344 | C  | -0.93082 | -1.87733 | -1.98605 |
| C  | -1.30714 | -2.71805 | -2.50091 | C  | -1.91739 | -1.15495 | -2.71608 |
| H  | -1.59704 | 0.66495  | -2.74288 | H  | -0.97913 | 1.98580  | -1.96078 |
| H  | -2.64736 | -1.42415 | -3.57497 | H  | -2.69583 | 0.75905  | -3.22056 |
| H  | 0.26514  | -3.78855 | -1.49504 | H  | -0.80243 | -2.93889 | -2.15793 |
| H  | -1.76356 | -3.62066 | -2.89086 | H  | -2.57084 | -1.68488 | -3.39858 |
| C  | -1.73501 | -0.93548 | 2.60656  | C  | -2.21748 | 0.14111  | 2.58913  |
| C  | -2.63045 | 0.13171  | 2.34820  | C  | -3.26976 | 0.99291  | 2.14680  |
| C  | -1.70556 | -1.97324 | 1.67946  | C  | -2.01512 | -1.03553 | 1.85502  |
| C  | -3.58426 | 0.01409  | 1.29757  | C  | -4.15876 | 0.63704  | 1.09830  |
| C  | -2.70312 | -2.12017 | 0.67266  | C  | -2.85055 | -1.34797 | 0.75762  |
| C  | -3.69714 | -1.17174 | 0.50599  | C  | -3.97036 | -0.56216 | 0.39500  |
| H  | -2.67817 | 0.97775  | 3.02029  | H  | -3.42323 | 1.93345  | 2.65995  |
| H  | -0.95192 | -2.74460 | 1.77655  | H  | -1.19180 | -1.69168 | 2.10529  |
| H  | -4.32508 | 0.79482  | 1.19217  | H  | -4.97159 | 1.30444  | 0.85240  |
| H  | -2.67607 | -2.99008 | 0.03099  | H  | -2.62749 | -2.22835 | 0.17112  |
| C  | -0.78825 | -0.87016 | 3.75844  | C  | -1.38094 | 0.49298  | 3.78048  |
| H  | -0.23183 | -1.80068 | 3.86784  | H  | -0.35482 | 0.15516  | 3.64394  |
| H  | -0.07678 | -0.05922 | 3.59384  | H  | -1.36349 | 1.57106  | 3.93778  |
| H  | -1.33048 | -0.67761 | 4.68718  | H  | -1.78648 | 0.02647  | 4.68348  |
| C  | -4.83604 | -1.38072 | -0.46523 | C  | -4.88165 | -1.03252 | -0.71210 |
| H  | -4.54039 | -2.20569 | -1.11953 | H  | -4.23515 | -1.50997 | -1.45449 |
| C  | -5.12114 | -0.16171 | -1.34591 | C  | -5.64035 | 0.09429  | -1.41031 |
| C  | -6.09771 | -1.81177 | 0.29979  | C  | -5.85077 | -2.10016 | -0.17946 |
| H  | -5.91511 | -2.70988 | 0.89258  | H  | -5.31512 | -2.93274 | 0.28007  |
| H  | -6.43135 | -1.02180 | 0.97764  | H  | -6.52099 | -1.67455 | 0.57177  |
| H  | -6.91160 | -2.02163 | -0.39740 | H  | -6.46243 | -2.49727 | -0.99256 |
| H  | -5.46373 | 0.69127  | -0.75607 | H  | -6.37782 | 0.55574  | -0.74905 |
| H  | -5.90874 | -0.39772 | -2.06424 | H  | -6.18130 | -0.30065 | -2.27214 |
| H  | -4.23225 | 0.14278  | -1.89689 | H  | -4.96072 | 0.87215  | -1.76081 |
| Ru | -1.63332 | 0.25769  | 0.29535  | Ru | -1.94251 | 0.80868  | 0.36907  |
| C  | 1.99099  | -0.05720 | -0.66227 | C  | 1.94024  | -0.63280 | -0.21467 |
| C  | 1.74972  | -1.41045 | -0.68880 | C  | 1.16542  | -1.68620 | -0.57419 |
| C  | 3.20556  | 0.63011  | -0.20523 | C  | 3.26555  | -0.66387 | 0.41844  |
| C  | 3.85195  | 0.24894  | 0.97633  | C  | 3.51971  | -1.53300 | 1.48803  |
| C  | 3.73767  | 1.69408  | -0.94313 | C  | 4.29838  | 0.18260  | -0.00437 |
| C  | 5.00147  | 0.90133  | 1.39807  | C  | 4.76215  | -1.56245 | 2.10370  |
| C  | 4.89042  | 2.34491  | -0.52139 | C  | 5.54223  | 0.15221  | 0.61387  |

|                      |          |          |          |                |          |          |          |
|----------------------|----------|----------|----------|----------------|----------|----------|----------|
| C                    | 5.52724  | 1.95045  | 0.64976  | C              | 5.78125  | -0.71996 | 1.66941  |
| H                    | 3.43739  | -0.55425 | 1.56930  | H              | 2.72847  | -2.18027 | 1.84269  |
| H                    | 3.25148  | 2.00059  | -1.85943 | H              | 4.13675  | 0.85093  | -0.83839 |
| H                    | 5.48607  | 0.59540  | 2.31826  | H              | 4.93351  | -2.23884 | 2.93334  |
| H                    | 5.29259  | 3.16102  | -1.11056 | H              | 6.32912  | 0.81100  | 0.26487  |
| H                    | 6.42553  | 2.45914  | 0.98019  | H              | 6.75115  | -0.74124 | 2.15237  |
| C                    | 2.68604  | -2.49516 | -0.34412 | C              | 1.52754  | -3.11467 | -0.52704 |
| C                    | 2.28398  | -3.53834 | 0.49608  | C              | 0.65043  | -4.05098 | 0.02853  |
| C                    | 3.98276  | -2.52449 | -0.86777 | C              | 2.73984  | -3.56633 | -1.05765 |
| C                    | 3.15493  | -4.57338 | 0.81383  | C              | 0.98555  | -5.39868 | 0.07323  |
| C                    | 4.85191  | -3.56027 | -0.55357 | C              | 3.06994  | -4.91411 | -1.02302 |
| C                    | 4.44286  | -4.58817 | 0.29039  | C              | 2.19630  | -5.83502 | -0.45307 |
| H                    | 1.28477  | -3.52923 | 0.91381  | H              | -0.29451 | -3.71807 | 0.44003  |
| H                    | 4.30574  | -1.73090 | -1.52943 | H              | 3.42216  | -2.85352 | -1.50300 |
| H                    | 2.82704  | -5.36881 | 1.47327  | H              | 0.29851  | -6.10933 | 0.51800  |
| H                    | 5.85158  | -3.56789 | -0.97270 | H              | 4.01118  | -5.24769 | -1.44452 |
| H                    | 5.12213  | -5.39634 | 0.53526  | H              | 2.45595  | -6.88680 | -0.42353 |
| <b>LRu(CO)(HOAc)</b> |          |          |          | <b>LRu(CO)</b> |          |          |          |
| C                    | -1.87269 | 0.93263  | 1.16622  | C              | -2.34975 | -1.29604 | -0.06178 |
| O                    | -2.83088 | 1.22151  | 1.77452  | O              | -3.37312 | -1.86125 | 0.02280  |
| Ru                   | -0.40616 | 0.39496  | 0.22378  | Ru             | -0.71187 | -0.53812 | -0.27000 |
| C                    | 1.83378  | 0.77547  | 0.86102  | C              | 0.89665  | 0.29070  | 1.23836  |
| C                    | 1.89420  | -0.18797 | -0.15240 | C              | 1.51319  | 0.31051  | -0.02543 |
| C                    | 1.27001  | 0.09591  | -1.40693 | C              | 0.88952  | 1.01766  | -1.09800 |
| C                    | 0.60728  | 1.30332  | -1.66373 | C              | -0.35444 | 1.64104  | -0.95121 |
| C                    | 0.45837  | 2.24765  | -0.61121 | C              | -1.05465 | 1.51299  | 0.28688  |
| C                    | 1.06543  | 1.95426  | 0.64666  | C              | -0.40571 | 0.83432  | 1.37776  |
| H                    | 2.31787  | 0.61817  | 1.81353  | H              | 1.37052  | -0.18851 | 2.08223  |
| H                    | 1.29524  | -0.66424 | -2.17781 | H              | 1.37789  | 1.02715  | -2.06469 |
| H                    | 0.19178  | 1.50236  | -2.64218 | H              | -0.79358 | 2.18996  | -1.77350 |
| H                    | 0.97083  | 2.67333  | 1.44960  | H              | -0.90251 | 0.78838  | 2.33792  |
| C                    | 2.61549  | -1.50991 | 0.00820  | C              | 2.85426  | -0.34759 | -0.28637 |
| C                    | 2.62374  | -2.04342 | 1.44026  | C              | 3.09989  | -1.61274 | 0.53688  |
| C                    | 4.04439  | -1.39542 | -0.54497 | C              | 3.98566  | 0.67035  | -0.07661 |
| H                    | 2.07444  | -2.23242 | -0.61167 | H              | 2.85529  | -0.63515 | -1.34306 |
| H                    | 1.61273  | -2.10669 | 1.84481  | H              | 2.29419  | -2.33733 | 0.40540  |
| H                    | 3.06662  | -3.04111 | 1.46352  | H              | 4.03533  | -2.08292 | 0.22726  |
| H                    | 3.21777  | -1.41025 | 2.10346  | H              | 3.18522  | -1.39182 | 1.60316  |
| H                    | 4.04488  | -1.05133 | -1.58105 | H              | 3.84043  | 1.55959  | -0.69286 |
| H                    | 4.62897  | -0.68558 | 0.04586  | H              | 4.02801  | 0.98763  | 0.96846  |
| H                    | 4.54924  | -2.36343 | -0.50856 | H              | 4.95125  | 0.23073  | -0.33662 |



|                            |          |          |          |                            |          |          |          |
|----------------------------|----------|----------|----------|----------------------------|----------|----------|----------|
| C                          | -0.23418 | 3.55889  | -0.83891 | C                          | -2.37428 | 2.19404  | 0.49678  |
| H                          | -1.04982 | 3.45094  | -1.55447 | H                          | -2.95487 | 2.21810  | -0.42583 |
| H                          | -0.64423 | 3.95272  | 0.09116  | H                          | -2.96271 | 1.68410  | 1.25982  |
| H                          | 0.46777  | 4.29875  | -1.23540 | H                          | -2.21914 | 3.22592  | 0.82656  |
| H                          | -2.29649 | -0.16456 | -0.99791 |                            |          |          |          |
| O                          | -2.79669 | -1.03560 | -1.15306 |                            |          |          |          |
| O                          | -1.16797 | -1.67966 | 0.22873  |                            |          |          |          |
| C                          | -2.16250 | -1.94736 | -0.44952 |                            |          |          |          |
| C                          | -2.73434 | -3.32330 | -0.53295 |                            |          |          |          |
| H                          | -2.78666 | -3.63677 | -1.57689 |                            |          |          |          |
| H                          | -2.12529 | -4.01775 | 0.03875  |                            |          |          |          |
| H                          | -3.75426 | -3.31487 | -0.14316 |                            |          |          |          |
| <b><sup>3</sup>pre-CAT</b> |          |          |          | <b><sup>1</sup>pre-CAT</b> |          |          |          |
| C                          | 2.43693  | 0.90365  | 0.08823  | C                          | 2.18963  | -0.94561 | -0.72763 |
| O                          | 3.54292  | 1.21824  | 0.19150  | O                          | 3.16514  | -1.24645 | -1.25471 |
| Ru                         | 0.65902  | 0.37884  | -0.04726 | Ru                         | 0.62401  | -0.40825 | 0.11481  |
| C                          | -0.92026 | -0.91163 | 1.15995  | C                          | -0.84965 | 0.79311  | -1.15074 |
| C                          | -1.50460 | -0.61138 | -0.10351 | C                          | -1.54760 | 0.55529  | 0.06869  |
| C                          | -0.83031 | -1.01749 | -1.27207 | C                          | -0.91489 | 0.91945  | 1.26279  |
| C                          | 0.45673  | -1.58434 | -1.20001 | C                          | 0.36569  | 1.54434  | 1.27411  |
| C                          | 1.06083  | -1.84114 | 0.05984  | C                          | 1.00587  | 1.88780  | 0.07086  |
| C                          | 0.32897  | -1.53348 | 1.24244  | C                          | 0.38839  | 1.46584  | -1.13902 |
| H                          | -1.42800 | -0.63160 | 2.07157  | H                          | -1.27534 | 0.49218  | -2.09662 |
| H                          | -1.26818 | -0.80971 | -2.24046 | H                          | -1.38105 | 0.66693  | 2.20686  |
| H                          | 0.98448  | -1.84252 | -2.10841 | H                          | 0.83048  | 1.78603  | 2.22086  |
| H                          | 0.76199  | -1.74731 | 2.21101  | H                          | 0.89792  | 1.64204  | -2.07792 |
| C                          | -2.85528 | 0.06500  | -0.22359 | C                          | -2.90343 | -0.10991 | 0.09254  |
| C                          | -3.15974 | 1.04876  | 0.90717  | C                          | -3.00159 | -1.31457 | -0.84629 |
| C                          | -3.95759 | -0.99982 | -0.33592 | C                          | -3.98781 | 0.93448  | -0.21510 |
| H                          | -2.83307 | 0.62985  | -1.16073 | H                          | -3.05487 | -0.46794 | 1.11472  |
| H                          | -2.36650 | 1.78755  | 1.02181  | H                          | -2.22008 | -2.04139 | -0.62459 |
| H                          | -4.08989 | 1.57724  | 0.69104  | H                          | -3.97283 | -1.79673 | -0.72142 |
| H                          | -3.29562 | 0.53665  | 1.86270  | H                          | -2.91715 | -1.01941 | -1.89449 |
| H                          | -3.77954 | -1.67402 | -1.17569 | H                          | -3.94583 | 1.77342  | 0.48206  |
| H                          | -4.00844 | -1.60065 | 0.57573  | H                          | -3.87409 | 1.32828  | -1.22817 |
| H                          | -4.92964 | -0.52432 | -0.48159 | H                          | -4.97669 | 0.47836  | -0.14028 |
| C                          | 2.40350  | -2.50419 | 0.14507  | C                          | 2.30779  | 2.62900  | 0.05417  |
| H                          | 3.00884  | -2.28254 | -0.73358 | H                          | 2.87676  | 2.44454  | 0.96488  |
| H                          | 2.94769  | -2.18170 | 1.03278  | H                          | 2.91632  | 2.34249  | -0.80330 |
| H                          | 2.28046  | -3.58922 | 0.20345  | H                          | 2.11971  | 3.70414  | -0.01591 |
| O                          | -0.03585 | 2.66901  | -0.88282 | O                          | 0.80584  | -1.86833 | 1.50212  |

|              |          |          |          |               |          |          |          |
|--------------|----------|----------|----------|---------------|----------|----------|----------|
| O            | 0.02586  | 2.31270  | 0.37933  | O             | 0.05478  | -2.32586 | 0.38954  |
| <b>TS-1c</b> |          |          |          | <b>INT-1c</b> |          |          |          |
| C            | -1.33330 | 0.22542  | 1.60064  | C             | 1.47038  | 0.69188  | -1.53506 |
| O            | -2.11675 | 0.41039  | 2.40924  | O             | 2.16838  | 1.04377  | -2.37064 |
| Ru           | -0.03404 | 0.01141  | 0.25446  | Ru            | 0.23932  | 0.21927  | -0.21418 |
| C            | 1.93996  | 0.75955  | 0.85410  | C             | -1.89748 | 0.74966  | -0.81503 |
| C            | 2.23619  | 0.13022  | -0.39291 | C             | -2.09129 | -0.02967 | 0.36123  |
| C            | 1.43910  | 0.48145  | -1.48299 | C             | -1.37807 | 0.34225  | 1.50368  |
| C            | 0.45999  | 1.52676  | -1.40585 | C             | -0.56749 | 1.51610  | 1.52622  |
| C            | 0.28078  | 2.26984  | -0.24030 | C             | -0.47117 | 2.36457  | 0.41952  |
| C            | 0.99250  | 1.81674  | 0.91498  | C             | -1.11003 | 1.91789  | -0.77770 |
| H            | 2.46198  | 0.47326  | 1.75445  | H             | -2.36017 | 0.46137  | -1.74638 |
| H            | 1.53406  | -0.07044 | -2.40962 | H             | -1.41856 | -0.28281 | 2.38667  |
| H            | -0.15919 | 1.72580  | -2.27022 | H             | -0.00613 | 1.74511  | 2.42296  |
| H            | 0.80705  | 2.29386  | 1.86893  | H             | -0.99032 | 2.49547  | -1.68611 |
| C            | 3.29309  | -0.93862 | -0.52857 | C             | -2.98216 | -1.24851 | 0.39041  |
| C            | 3.45637  | -1.81161 | 0.71651  | C             | -3.15999 | -1.92265 | -0.96941 |
| C            | 4.62269  | -0.27282 | -0.92094 | C             | -4.33933 | -0.85472 | 0.99876  |
| H            | 2.97664  | -1.58108 | -1.35534 | H             | -2.50208 | -1.96319 | 1.06544  |
| H            | 2.50373  | -2.24658 | 1.01772  | H             | -2.19307 | -2.14336 | -1.42062 |
| H            | 4.15637  | -2.62068 | 0.50134  | H             | -3.70964 | -2.85670 | -0.84140 |
| H            | 3.86694  | -1.24499 | 1.55573  | H             | -3.73995 | -1.29878 | -1.65439 |
| H            | 4.52680  | 0.30597  | -1.84128 | H             | -4.22693 | -0.42988 | 1.99775  |
| H            | 4.96915  | 0.39811  | -0.13087 | H             | -4.84667 | -0.11844 | 0.37043  |
| H            | 5.38802  | -1.03560 | -1.07516 | H             | -4.98101 | -1.73468 | 1.07246  |
| C            | -0.68471 | 3.41045  | -0.16175 | C             | 0.29476  | 3.65067  | 0.46266  |
| H            | -1.50963 | 3.26605  | -0.85816 | H             | 1.07393  | 3.61693  | 1.22343  |
| H            | -1.09011 | 3.51769  | 0.84422  | H             | 0.75444  | 3.87160  | -0.50063 |
| H            | -0.17790 | 4.34493  | -0.41823 | H             | -0.37971 | 4.47656  | 0.70618  |
| O            | -0.56384 | -2.13276 | -0.49840 | O             | 0.66538  | -2.68771 | -0.32983 |
| O            | 0.06335  | -1.93103 | 0.77253  | O             | 0.13310  | -1.61044 | -1.12836 |
| H            | -1.59213 | -2.09235 | -0.29411 | H             | 1.61828  | -2.61296 | -0.52851 |
| O            | -3.03319 | -1.88457 | -0.20042 | O             | 3.14360  | -1.26764 | -0.40938 |
| O            | -2.38410 | 0.11299  | -0.97081 | O             | 1.74109  | -0.37178 | 1.09720  |
| C            | -3.26476 | -0.74842 | -0.72275 | C             | 2.84560  | -0.93558 | 0.74245  |
| C            | -4.71388 | -0.42555 | -1.04146 | C             | 3.79786  | -1.21140 | 1.88973  |
| H            | -5.27540 | -0.35352 | -0.10693 | H             | 4.82598  | -1.09641 | 1.54932  |
| H            | -4.80029 | 0.51295  | -1.58511 | H             | 3.60422  | -0.56211 | 2.74119  |

|              |          |          |          |               |          |          |          |
|--------------|----------|----------|----------|---------------|----------|----------|----------|
| H            | -5.15600 | -1.23608 | -1.62290 | H             | 3.66536  | -2.24817 | 2.20911  |
| <b>TS-2c</b> |          |          |          | <b>INT-2c</b> |          |          |          |
| C            | -0.36822 | 0.60125  | -2.00664 | C             | 0.78952  | -1.46877 | -2.03896 |
| O            | -0.57311 | 1.07439  | -3.02142 | O             | 1.12009  | -1.99082 | -2.99774 |
| Ru           | 0.02761  | -0.34111 | -0.41624 | Ru            | 0.30526  | -0.63405 | -0.43216 |
| C            | 2.11517  | -0.78989 | -1.12381 | C             | 2.24896  | -1.21535 | 0.55305  |
| C            | 2.20129  | -0.48725 | 0.24151  | C             | 1.95450  | 0.09997  | 0.94750  |
| C            | 1.49617  | -1.34417 | 1.16402  | C             | 0.74859  | 0.31244  | 1.69712  |
| C            | 0.63459  | -2.32688 | 0.72713  | C             | -0.15811 | -0.70921 | 1.91082  |
| C            | 0.38090  | -2.49828 | -0.67619 | C             | 0.07412  | -2.02496 | 1.38650  |
| C            | 1.19186  | -1.77228 | -1.58475 | C             | 1.31269  | -2.26502 | 0.76974  |
| H            | 2.65598  | -0.20117 | -1.85042 | H             | 3.16045  | -1.43333 | 0.01497  |
| H            | 1.56239  | -1.13099 | 2.22227  | H             | 0.51117  | 1.31141  | 2.03154  |
| H            | 0.04912  | -2.88828 | 1.44045  | H             | -1.09366 | -0.49068 | 2.40049  |
| H            | 1.06762  | -1.92629 | -2.64898 | H             | 1.53493  | -3.25417 | 0.38911  |
| C            | 3.06376  | 0.61870  | 0.79644  | C             | 2.88409  | 1.26419  | 0.70395  |
| C            | 3.32037  | 1.75668  | -0.18858 | C             | 3.69503  | 1.14682  | -0.58499 |
| C            | 4.37929  | 0.01397  | 1.31555  | C             | 3.79568  | 1.44379  | 1.92867  |
| H            | 2.51146  | 1.02579  | 1.64797  | H             | 2.24548  | 2.14816  | 0.62216  |
| H            | 2.38283  | 2.17752  | -0.55273 | H             | 3.04258  | 1.01033  | -1.44744 |
| H            | 3.87734  | 2.54924  | 0.31383  | H             | 4.27387  | 2.05930  | -0.73578 |
| H            | 3.92428  | 1.43053  | -1.03918 | H             | 4.40540  | 0.31774  | -0.54573 |
| H            | 4.20393  | -0.77712 | 2.04731  | H             | 3.21855  | 1.56413  | 2.84745  |
| H            | 4.96317  | -0.40688 | 0.49329  | H             | 4.45364  | 0.57998  | 2.05108  |
| H            | 4.97836  | 0.78930  | 1.79580  | H             | 4.41908  | 2.33050  | 1.80238  |
| C            | -0.62533 | -3.49641 | -1.15030 | C             | -0.92341 | -3.12126 | 1.59129  |
| H            | -1.49130 | -3.50729 | -0.49037 | H             | -1.93297 | -2.73778 | 1.46297  |
| H            | -0.95229 | -3.27508 | -2.16533 | H             | -0.75450 | -3.93883 | 0.89119  |
| H            | -0.18109 | -4.49609 | -1.14385 | H             | -0.83052 | -3.51791 | 2.60667  |
| O            | -0.72000 | 0.10855  | 2.93757  | O             | -3.53414 | 1.69089  | 1.87772  |
| O            | -0.21545 | 0.83216  | 1.77945  | O             | -2.18619 | 2.03554  | 2.30345  |
| H            | -1.28231 | -0.57705 | 2.50617  | H             | -3.39317 | 0.78682  | 1.50961  |
| O            | -2.22344 | -1.66084 | 1.53828  | O             | -2.79326 | -0.62585 | 0.68664  |
| O            | -2.06571 | -0.47250 | -0.36143 | O             | -1.63238 | -0.68366 | -1.23495 |
| C            | -2.72401 | -1.08293 | 0.56311  | C             | -2.71367 | -0.57709 | -0.54911 |
| C            | -4.22583 | -1.02529 | 0.39548  | C             | -3.96061 | -0.35314 | -1.37883 |
| H            | -4.50719 | -0.87723 | -0.64488 | H             | -4.24947 | 0.69622  | -1.27838 |
| H            | -4.67919 | -1.93220 | 0.79255  | H             | -3.79172 | -0.57241 | -2.43049 |

|               |          |          |          |              |          |          |          |
|---------------|----------|----------|----------|--------------|----------|----------|----------|
| H             | -4.59989 | -0.17891 | 0.97730  | H            | -4.77784 | -0.95972 | -0.98911 |
| H             | -0.88267 | 1.60174  | 1.63140  | H            | -1.73981 | 2.19777  | 1.44550  |
| O             | -1.66972 | 2.79091  | 1.12139  | O            | -0.78712 | 2.32495  | -0.04636 |
| O             | -0.08142 | 2.38493  | -0.39803 | O            | 0.32919  | 1.12182  | -1.57882 |
| C             | -1.03797 | 3.07164  | 0.06527  | C            | -0.27435 | 2.18264  | -1.16022 |
| C             | -1.44024 | 4.31354  | -0.70961 | C            | -0.33167 | 3.30145  | -2.17969 |
| H             | -2.18042 | 4.89879  | -0.16744 | H            | -1.29162 | 3.24082  | -2.69878 |
| H             | -0.56004 | 4.92452  | -0.91469 | H            | -0.28192 | 4.26660  | -1.67768 |
| H             | -1.85485 | 4.01098  | -1.67413 | H            | 0.46286  | 3.21144  | -2.91756 |
| <b>INT-3c</b> |          |          |          | <b>TS-3c</b> |          |          |          |
| C             | 0.27604  | -0.19908 | 2.29055  | C            | -0.34161 | -2.39030 | 0.01200  |
| O             | 0.30407  | -0.19893 | 3.43224  | C            | 0.17577  | -1.87215 | -1.21151 |
| Ru            | 0.17531  | -0.25116 | 0.42543  | C            | 0.33865  | -2.07063 | 1.20598  |
| C             | -1.60546 | -1.63598 | 0.49342  | C            | 1.35589  | -1.08552 | -1.22532 |
| C             | -1.84791 | -0.69183 | -0.51774 | C            | 1.49478  | -1.24756 | 1.17462  |
| C             | -0.94759 | -0.67445 | -1.63617 | C            | 2.05737  | -0.76835 | -0.03289 |
| C             | 0.19534  | -1.45097 | -1.65200 | H            | -0.37782 | -2.01529 | -2.12675 |
| C             | 0.52538  | -2.30509 | -0.54687 | H            | -0.07983 | -2.36640 | 2.15768  |
| C             | -0.42588 | -2.43194 | 0.47768  | H            | 1.66002  | -0.64372 | -2.16271 |
| H             | -2.27715 | -1.71773 | 1.33625  | H            | 1.92211  | -0.91596 | 2.11292  |
| H             | -1.12514 | 0.02804  | -2.43625 | C            | -1.60884 | -3.18304 | 0.03122  |
| H             | 0.90069  | -1.35009 | -2.46137 | H            | -2.11552 | -3.08841 | 0.99119  |
| H             | -0.22809 | -3.09647 | 1.30941  | H            | -2.27702 | -2.85156 | -0.76054 |
| C             | -3.05817 | 0.21100  | -0.52820 | H            | -1.37640 | -4.24025 | -0.12750 |
| C             | -3.49488 | 0.66812  | 0.86289  | C            | 3.30904  | 0.07853  | 0.00357  |
| C             | -4.20354 | -0.48815 | -1.27771 | H            | 3.25146  | 0.67304  | 0.92036  |
| H             | -2.76745 | 1.09701  | -1.09841 | C            | 3.44143  | 1.04189  | -1.17506 |
| H             | -2.67376 | 1.15498  | 1.38891  | C            | 4.53838  | -0.83765 | 0.10415  |
| H             | -4.31551 | 1.38159  | 0.77211  | H            | 4.47862  | -1.49539 | 0.97337  |
| H             | -3.85769 | -0.16417 | 1.47062  | H            | 4.62859  | -1.46303 | -0.78774 |
| H             | -3.90361 | -0.78548 | -2.28447 | H            | 5.44847  | -0.24099 | 0.19194  |
| H             | -4.52768 | -1.38363 | -0.74164 | H            | 3.60857  | 0.50841  | -2.11402 |
| H             | -5.05914 | 0.18381  | -1.36438 | H            | 4.30031  | 1.69639  | -1.01845 |
| C             | 1.78691  | -3.10960 | -0.55297 | H            | 2.55384  | 1.66284  | -1.28857 |
| H             | 2.60857  | -2.51214 | -0.94204 | Ru           | -0.08996 | -0.19024 | 0.11421  |
| H             | 2.03455  | -3.45693 | 0.44956  | O            | -2.67411 | -0.67253 | -1.87241 |
| H             | 1.66365  | -3.98593 | -1.19626 | C            | -2.96005 | -0.07192 | -0.83698 |
| O             | 2.78191  | -0.16288 | -1.57694 | O            | -2.14711 | 0.19080  | 0.13689  |
| O             | 2.14891  | 0.44414  | 0.49968  | C            | -4.36376 | 0.46109  | -0.60772 |
| C             | 2.97744  | 0.38743  | -0.49481 | H            | -4.66400 | 0.33987  | 0.43281  |
| C             | 4.28226  | 1.11589  | -0.21975 | H            | -5.07073 | -0.03841 | -1.26723 |

|   |          |         |          |   |          |         |          |
|---|----------|---------|----------|---|----------|---------|----------|
| H | 4.14347  | 2.17471 | -0.45222 | H | -4.37349 | 1.53089 | -0.83077 |
| H | 4.56512  | 1.03933 | 0.82908  | O | -0.15343 | 1.53553 | -1.12487 |
| H | 5.07211  | 0.72420 | -0.85799 | C | 0.10947  | 2.50250 | -0.32847 |
| O | -0.12720 | 2.17891 | -1.61140 | O | 0.41203  | 2.29223 | 0.86264  |
| O | -0.18336 | 1.80473 | 0.60631  | C | 0.02700  | 3.90142 | -0.88149 |
| C | -0.20398 | 2.56272 | -0.44610 | H | 0.25486  | 3.91582 | -1.94616 |
| C | -0.31928 | 4.03937 | -0.11197 | H | 0.69951  | 4.56300 | -0.33836 |
| H | 0.67547  | 4.41941 | 0.13350  | H | -0.99373 | 4.26887 | -0.74935 |
| H | -0.69893 | 4.59067 | -0.97010 | C | -0.87055 | 0.71676 | 2.51148  |
| H | -0.95790 | 4.19758 | 0.75609  | O | -1.40454 | 1.34400 | 3.27915  |

**Table S3** Frequencies of all stationary points for the overall catalytic cycle, computed at B3LYP-D3a+IDSCRF/TZP-DKH(-dfg) level in tert-butanol

| Species                       | Fequencies(cm <sup>-1</sup> )                                                                                                                                                                                                                                                                                                                                                                                                                                                                                                                                                                                                                                             |
|-------------------------------|---------------------------------------------------------------------------------------------------------------------------------------------------------------------------------------------------------------------------------------------------------------------------------------------------------------------------------------------------------------------------------------------------------------------------------------------------------------------------------------------------------------------------------------------------------------------------------------------------------------------------------------------------------------------------|
| <b>1a</b>                     | 46 54 100 110 137 194 263 282 297 325 352<br>378 415 440 448 485 518 535 549 592 636 645<br>670 689 706 716 725 772 789 813 855 859 884<br>913 949 984 1000 1011 1016 1016 1024 1052 1059 1110 1135<br>1148 1176 1185 1210 1223 1251 1263 1312 1336 1340 1368 1376<br>1436 1485 1504 1514 1533 1598 1616 1628 1644 1653 1667 3161<br>3169 3170 3180 3182 3190 3194 3205 3235 3463                                                                                                                                                                                                                                                                                         |
| <b>2a</b>                     | 41 47 48 138 156 261 285 409 413 414 478<br>526 551 566 576 637 644 706 707 718 776 776<br>855 855 860 937 937 993 993 1011 1011 1019 1020 1049<br>1051 1102 1103 1163 1182 1182 1200 1201 1311 1313 1340 1358 1358<br>1477 1479 1521 1538 1608 1609 1636 1644 2292 3159 3159 3167<br>3167 3176 3177 3183 3183 3187 3187                                                                                                                                                                                                                                                                                                                                                  |
| <b>3a</b>                     | 28 30 49 53 57 63 79 95 103 138 189<br>195 209 215 228 259 282 291 302 332 393 414<br>417 420 428 450 492 523 530 546 561 597 601<br>633 635 641 653 655 688 706 714 716 717 725<br>758 768 770 775 786 812 821 861 862 867 870<br>884 892 909 942 947 963 965 978 996 997 1001<br>1003 1009 1012 1012 1024 1024 1034 1042 1052 1053 1071 1098<br>1105 1109 1128 1142 1171 1182 1182 1182 1196 1204 1206 1220 1228<br>1255 1268 1311 1317 1322 1328 1358 1361 1362 1369 1381 1479<br>1481 1495 1495 1500 1512 1528 1536 1612 1616 1627 1633 1640<br>1643 1645 1646 1650 1752 3157 3157 3161 3165 3166 3166 3168<br>3173 3176 3178 3180 3181 3186 3187 3189 3191 3192 3203 |
| AcOH                          | 66 433 543 589 649 869 1004 1069 1197 1345 1410 1467<br>1473 1769 3051 3108 3159 3492                                                                                                                                                                                                                                                                                                                                                                                                                                                                                                                                                                                     |
| <sup>3</sup> O <sub>2</sub>   | 1613                                                                                                                                                                                                                                                                                                                                                                                                                                                                                                                                                                                                                                                                      |
| H <sub>2</sub> O <sub>2</sub> | 376 950 1339 1393 3545 3561                                                                                                                                                                                                                                                                                                                                                                                                                                                                                                                                                                                                                                               |
| CO                            | 2206                                                                                                                                                                                                                                                                                                                                                                                                                                                                                                                                                                                                                                                                      |
| <b>CAT</b>                    | 25 33 41 50 63 68 77 98 114 120 135<br>175 184 198 215 218 237 243 265 268 285 299<br>330 354 394 405 437 445 450 486 525 532 582<br>623 626 648 675 677 690 696 818 896 904 915<br>936 942 963 973 979 988 1010 1018 1021 1033 1055 1063<br>1070 1081 1114 1136 1172 1182 1227 1240 1310 1335 1341 1358<br>1384 1390 1403 1418 1418 1423 1426 1448 1465 1466 1474 1476                                                                                                                                                                                                                                                                                                   |

|              |                                                                                                                                                                                                                                                                                                                                                                                                                                                                                                                                                                                                                                                                                                                                                                                                                                                                                                                                                       |
|--------------|-------------------------------------------------------------------------------------------------------------------------------------------------------------------------------------------------------------------------------------------------------------------------------------------------------------------------------------------------------------------------------------------------------------------------------------------------------------------------------------------------------------------------------------------------------------------------------------------------------------------------------------------------------------------------------------------------------------------------------------------------------------------------------------------------------------------------------------------------------------------------------------------------------------------------------------------------------|
|              | 1486 1488 1492 1499 1502 1504 1513 1523 1533 1568 1646 3020<br>3026 3035 3035 3044 3048 3088 3094 3097 3098 3102 3111 3111<br>3128 3137 3143 3174 3195 3217 3234                                                                                                                                                                                                                                                                                                                                                                                                                                                                                                                                                                                                                                                                                                                                                                                      |
| <b>TS-1</b>  | -70 15 23 30 35 47 53 60 62 68 70<br>74 82 90 98 109 116 129 133 143 152 165<br>176 183 205 206 219 220 233 248 259 266 272<br>279 289 294 301 325 327 341 358 382 385 409<br>414 427 430 450 456 457 468 489 492 519 525<br>528 550 570 592 616 630 633 646 649 671 673<br>679 689 691 703 710 718 726 773 791 815 817<br>858 863 885 897 906 915 922 940 943 951 970<br>972 975 985 986 1001 1010 1010 1013 1018 1020 1025 1025<br>1033 1052 1057 1064 1065 1072 1084 1107 1113 1136 1142 1159 1168<br>1174 1184 1193 1208 1229 1230 1243 1256 1259 1312 1318 1335<br>1336 1341 1360 1366 1367 1375 1386 1390 1402 1418 1420 1425<br>1430 1434 1443 1467 1471 1478 1481 1484 1489 1492 1494 1503<br>1504 1506 1506 1510 1514 1529 1534 1537 1576 1605 1617 1637<br>1644 1645 1656 1669 3027 3031 3032 3040 3041 3051 3089 3094<br>3095 3102 3109 3110 3114 3129 3149 3151 3161 3167 3171 3176<br>3179 3182 3189 3194 3199 3215 3217 3231 3245 3526  |
| <b>INT-1</b> | 24 34 46 48 52 56 57 62 63 66 70<br>75 83 96 107 117 120 134 140 145 169 172<br>185 190 201 206 217 226 247 251 257 265 277<br>284 286 288 306 319 333 357 371 397 402 412<br>418 429 448 450 457 480 503 517 520 521 534<br>552 574 592 620 627 633 645 665 669 670 677<br>683 691 698 711 716 729 774 791 815 818 859<br>866 887 889 903 916 931 934 938 944 954 976<br>977 985 988 1002 1007 1011 1012 1019 1023 1026 1033 1036<br>1052 1056 1061 1063 1065 1084 1105 1113 1135 1142 1167 1167 1173<br>1184 1188 1204 1216 1225 1226 1241 1245 1262 1272 1315 1324<br>1330 1339 1339 1362 1362 1370 1380 1389 1403 1415 1418 1421<br>1428 1430 1437 1467 1471 1476 1478 1482 1483 1489 1493 1495<br>1501 1503 1508 1508 1516 1532 1541 1566 1574 1608 1618 1638<br>1643 1649 1655 1673 2101 3026 3031 3034 3041 3045 3048 3088<br>3094 3099 3101 3107 3107 3115 3139 3143 3144 3162 3168 3172<br>3179 3181 3189 3189 3192 3194 3200 3214 3231 3241 |
| <b>TS-2</b>  | -719 24 33 35 38 45 56 57 63 64 69<br>73 79 82 95 114 120 123 139 145 157 171<br>176 186 193 207 211 226 242 246 254 260 269<br>281 284 286 299 312 323 340 356 371 399 411                                                                                                                                                                                                                                                                                                                                                                                                                                                                                                                                                                                                                                                                                                                                                                           |

|              |      |      |      |      |      |      |      |      |      |      |      |
|--------------|------|------|------|------|------|------|------|------|------|------|------|
|              | 413  | 416  | 442  | 449  | 458  | 465  | 495  | 507  | 517  | 520  | 522  |
|              | 554  | 571  | 590  | 600  | 621  | 625  | 633  | 645  | 663  | 669  | 671  |
|              | 680  | 691  | 697  | 698  | 711  | 732  | 774  | 774  | 792  | 818  | 819  |
|              | 863  | 866  | 886  | 890  | 902  | 918  | 930  | 936  | 940  | 943  | 953  |
|              | 975  | 976  | 984  | 988  | 1001 | 1009 | 1009 | 1012 | 1018 | 1024 | 1026 |
|              | 1041 | 1052 | 1056 | 1061 | 1064 | 1066 | 1083 | 1104 | 1113 | 1135 | 1142 |
|              | 1174 | 1183 | 1189 | 1203 | 1225 | 1227 | 1241 | 1250 | 1260 | 1315 | 1323 |
|              | 1339 | 1340 | 1359 | 1361 | 1362 | 1371 | 1386 | 1389 | 1403 | 1415 | 1418 |
|              | 1427 | 1430 | 1453 | 1467 | 1469 | 1476 | 1478 | 1481 | 1488 | 1489 | 1492 |
|              | 1501 | 1503 | 1507 | 1508 | 1514 | 1532 | 1542 | 1565 | 1574 | 1604 | 1618 |
|              | 1640 | 1647 | 1648 | 1661 | 1680 | 3026 | 3032 | 3034 | 3041 | 3047 | 3050 |
|              | 3095 | 3099 | 3101 | 3107 | 3109 | 3115 | 3139 | 3144 | 3148 | 3161 | 3167 |
|              | 3179 | 3181 | 3188 | 3188 | 3193 | 3194 | 3198 | 3212 | 3232 | 3241 |      |
| <b>INT-2</b> | 29   | 34   | 43   | 47   | 52   | 55   | 63   | 64   | 65   | 73   | 77   |
|              | 81   | 85   | 98   | 111  | 120  | 121  | 133  | 142  | 151  | 171  | 173  |
|              | 186  | 193  | 203  | 206  | 215  | 228  | 233  | 251  | 256  | 259  | 279  |
|              | 280  | 284  | 290  | 314  | 319  | 334  | 357  | 371  | 395  | 404  | 412  |
|              | 413  | 432  | 449  | 458  | 460  | 488  | 500  | 513  | 518  | 520  | 527  |
|              | 557  | 572  | 592  | 617  | 622  | 633  | 644  | 658  | 660  | 667  | 672  |
|              | 680  | 691  | 698  | 711  | 730  | 736  | 773  | 790  | 819  | 821  | 861  |
|              | 865  | 884  | 892  | 903  | 916  | 929  | 931  | 937  | 942  | 951  | 973  |
|              | 975  | 983  | 986  | 1000 | 1007 | 1008 | 1011 | 1016 | 1024 | 1026 | 1032 |
|              | 1051 | 1055 | 1061 | 1064 | 1066 | 1083 | 1103 | 1113 | 1135 | 1142 | 1165 |
|              | 1182 | 1189 | 1201 | 1203 | 1223 | 1225 | 1241 | 1252 | 1256 | 1315 | 1321 |
|              | 1339 | 1341 | 1360 | 1362 | 1370 | 1376 | 1389 | 1402 | 1408 | 1414 | 1418 |
|              | 1427 | 1430 | 1457 | 1467 | 1474 | 1476 | 1479 | 1481 | 1489 | 1492 | 1495 |
|              | 1502 | 1504 | 1508 | 1508 | 1514 | 1531 | 1543 | 1573 | 1586 | 1617 | 1629 |
|              | 1645 | 1645 | 1662 | 1666 | 2086 | 3026 | 3033 | 3034 | 3041 | 3049 | 3051 |
|              | 3095 | 3100 | 3100 | 3107 | 3110 | 3115 | 3138 | 3144 | 3155 | 3160 | 3166 |
|              | 3178 | 3180 | 3187 | 3188 | 3194 | 3194 | 3197 | 3210 | 3234 | 3243 |      |
| <b>TS-3</b>  | -78  | 22   | 29   | 31   | 35   | 48   | 50   | 55   | 58   | 61   | 68   |
|              | 71   | 74   | 80   | 85   | 91   | 98   | 104  | 107  | 113  | 123  | 132  |
|              | 141  | 146  | 147  | 181  | 192  | 197  | 220  | 241  | 244  | 265  | 275  |
|              | 280  | 282  | 290  | 303  | 315  | 345  | 362  | 376  | 390  | 407  | 418  |
|              | 427  | 441  | 448  | 452  | 455  | 459  | 497  | 507  | 514  | 515  | 529  |
|              | 557  | 577  | 579  | 592  | 615  | 625  | 635  | 639  | 641  | 667  | 672  |
|              | 681  | 690  | 699  | 722  | 731  | 733  | 752  | 773  | 786  | 817  | 827  |
|              | 861  | 875  | 884  | 894  | 895  | 918  | 926  | 939  | 940  | 947  | 951  |
|              | 972  | 975  | 984  | 995  | 1005 | 1009 | 1010 | 1012 | 1019 | 1025 | 1025 |
|              | 1031 | 1050 | 1055 | 1064 | 1065 | 1067 | 1084 | 1103 | 1104 | 1136 | 1139 |
|              | 1174 | 1180 | 1183 | 1199 | 1221 | 1226 | 1238 | 1250 | 1260 | 1276 | 1314 |
|              |      |      |      |      |      |      |      |      |      | 1324 |      |



|              |                                                                                                                                                                                                                                                                                                                                                                                                                                                                                                                                                                                                                                                                                                                                                                                                                                                                                                                                                       |
|--------------|-------------------------------------------------------------------------------------------------------------------------------------------------------------------------------------------------------------------------------------------------------------------------------------------------------------------------------------------------------------------------------------------------------------------------------------------------------------------------------------------------------------------------------------------------------------------------------------------------------------------------------------------------------------------------------------------------------------------------------------------------------------------------------------------------------------------------------------------------------------------------------------------------------------------------------------------------------|
|              | 1328 1333 1351 1357 1360 1373 1385 1397 1402 1410 1417 1419<br>1421 1427 1444 1465 1471 1472 1475 1476 1478 1489 1491 1493<br>1501 1503 1506 1507 1515 1524 1541 1560 1565 1610 1623 1629<br>1637 1638 1657 1741 3030 3034 3037 3043 3046 3049 3094 3100<br>3102 3103 3105 3110 3135 3139 3149 3150 3163 3167 3177 3179<br>3188 3191 3192 3194 3199 3204 3212 3214 3216 3311                                                                                                                                                                                                                                                                                                                                                                                                                                                                                                                                                                          |
| <b>INT-3</b> | 19 31 35 39 46 51 55 61 63 67 75<br>78 87 89 96 100 103 105 108 123 129 134<br>142 161 171 187 192 210 221 231 236 247 269<br>270 273 288 298 317 341 355 372 391 397 420<br>434 439 445 446 454 468 497 512 519 523 534<br>550 581 589 600 613 616 619 635 641 670 671<br>681 689 698 726 730 738 771 781 817 823 861<br>883 885 888 898 905 923 931 934 941 946 951<br>974 981 984 991 1004 1008 1013 1014 1018 1026 1027 1034<br>1038 1053 1058 1060 1061 1068 1080 1100 1106 1136 1138 1171 1173<br>1175 1185 1185 1210 1224 1238 1240 1253 1261 1287 1310 1333<br>1335 1336 1340 1357 1373 1376 1386 1387 1399 1408 1412 1421<br>1426 1435 1445 1466 1469 1471 1474 1475 1477 1488 1488 1493<br>1501 1503 1507 1507 1511 1531 1534 1563 1567 1605 1619 1626<br>1640 1641 1661 1731 3027 3036 3039 3043 3046 3049 3061 3091<br>3097 3099 3103 3106 3109 3112 3130 3136 3137 3152 3163 3166<br>3173 3178 3185 3187 3191 3192 3194 3202 3210 3232   |
| <b>TS-4</b>  | -1352 14 25 32 33 46 59 61 67 72 76<br>81 84 89 90 101 118 121 125 134 140 148<br>151 163 172 185 201 214 214 234 234 257 267<br>279 284 297 303 313 321 346 362 376 384 398<br>411 438 446 449 455 463 472 499 514 519 540<br>550 559 578 594 596 618 628 630 645 654 670<br>688 690 697 699 727 735 765 771 790 817 818<br>846 866 882 894 896 898 904 922 925 943 952<br>973 975 982 983 987 1006 1012 1013 1016 1025 1025 1028<br>1042 1052 1061 1067 1069 1071 1083 1112 1115 1137 1142 1166 1171<br>1174 1186 1186 1202 1223 1228 1240 1249 1264 1285 1289 1317<br>1317 1338 1341 1361 1376 1379 1388 1393 1401 1414 1417 1419<br>1422 1427 1447 1456 1464 1470 1473 1473 1478 1490 1490 1493<br>1497 1501 1502 1506 1508 1509 1514 1545 1553 1575 1594 1611<br>1617 1622 1636 1656 1739 3026 3033 3034 3048 3049 3054 3090<br>3096 3098 3099 3107 3116 3120 3139 3149 3150 3152 3161 3165<br>3166 3176 3177 3182 3187 3193 3197 3209 3213 3218 |
| <b>INT-4</b> | 14 25 34 45 57 60 69 77 85 100 102                                                                                                                                                                                                                                                                                                                                                                                                                                                                                                                                                                                                                                                                                                                                                                                                                                                                                                                    |

|              |      |      |      |      |      |      |      |      |      |      |      |
|--------------|------|------|------|------|------|------|------|------|------|------|------|
|              | 112  | 128  | 138  | 147  | 156  | 174  | 180  | 192  | 201  | 225  | 231  |
|              | 240  | 249  | 262  | 269  | 290  | 294  | 305  | 308  | 317  | 335  | 357  |
|              | 365  | 398  | 400  | 413  | 435  | 447  | 455  | 459  | 481  | 510  | 513  |
|              | 522  | 523  | 533  | 556  | 576  | 595  | 622  | 648  | 655  | 659  | 663  |
|              | 676  | 680  | 695  | 702  | 730  | 734  | 763  | 773  | 799  | 816  | 817  |
|              | 865  | 882  | 884  | 893  | 897  | 912  | 920  | 930  | 940  | 970  | 973  |
|              | 974  | 979  | 983  | 1002 | 1007 | 1010 | 1011 | 1026 | 1038 | 1047 | 1053 |
|              | 1069 | 1074 | 1076 | 1112 | 1125 | 1135 | 1136 | 1141 | 1165 | 1172 | 1180 |
|              | 1218 | 1218 | 1238 | 1252 | 1255 | 1276 | 1303 | 1312 | 1329 | 1335 | 1357 |
|              | 1372 | 1400 | 1406 | 1411 | 1417 | 1419 | 1421 | 1424 | 1457 | 1459 | 1473 |
|              | 1478 | 1483 | 1489 | 1492 | 1497 | 1499 | 1504 | 1507 | 1513 | 1516 | 1546 |
|              | 1578 | 1595 | 1618 | 1625 | 1632 | 1656 | 1670 | 2097 | 3024 | 3027 | 3031 |
|              | 3051 | 3088 | 3089 | 3094 | 3096 | 3108 | 3121 | 3128 | 3145 | 3158 | 3162 |
|              | 3166 | 3171 | 3176 | 3178 | 3185 | 3187 | 3189 | 3189 | 3193 | 3210 |      |
| <b>INT-5</b> | 18   | 25   | 26   | 29   | 35   | 39   | 43   | 50   | 55   | 57   | 65   |
|              | 70   | 75   | 80   | 86   | 92   | 100  | 111  | 112  | 120  | 126  | 131  |
|              | 134  | 142  | 147  | 159  | 167  | 169  | 187  | 189  | 191  | 200  | 225  |
|              | 242  | 247  | 248  | 258  | 272  | 277  | 293  | 293  | 314  | 320  | 328  |
|              | 350  | 365  | 378  | 384  | 390  | 393  | 408  | 410  | 417  | 430  | 441  |
|              | 446  | 455  | 468  | 487  | 504  | 512  | 517  | 518  | 522  | 536  | 555  |
|              | 562  | 568  | 569  | 589  | 597  | 605  | 620  | 638  | 639  | 644  | 654  |
|              | 656  | 679  | 682  | 696  | 699  | 707  | 712  | 730  | 733  | 735  | 754  |
|              | 770  | 773  | 773  | 792  | 810  | 820  | 856  | 860  | 864  | 867  | 877  |
|              | 884  | 888  | 891  | 896  | 912  | 919  | 936  | 943  | 950  | 974  | 975  |
|              | 982  | 983  | 992  | 998  | 1002 | 1006 | 1007 | 1008 | 1010 | 1012 | 1018 |
|              | 1022 | 1023 | 1024 | 1039 | 1051 | 1053 | 1053 | 1057 | 1065 | 1069 | 1080 |
|              | 1082 | 1104 | 1106 | 1111 | 1127 | 1136 | 1144 | 1163 | 1167 | 1172 | 1181 |
|              | 1182 | 1182 | 1186 | 1191 | 1202 | 1205 | 1227 | 1231 | 1242 | 1253 | 1255 |
|              | 1278 | 1284 | 1298 | 1305 | 1315 | 1317 | 1319 | 1331 | 1335 | 1357 | 1360 |
|              | 1363 | 1370 | 1384 | 1399 | 1408 | 1415 | 1418 | 1425 | 1433 | 1435 | 1458 |
|              | 1468 | 1475 | 1477 | 1478 | 1479 | 1482 | 1488 | 1490 | 1493 | 1498 | 1504 |
|              | 1505 | 1506 | 1515 | 1523 | 1533 | 1543 | 1566 | 1591 | 1595 | 1611 | 1613 |
|              | 1619 | 1625 | 1631 | 1638 | 1641 | 1655 | 1743 | 2093 | 2973 | 3027 | 3035 |
|              | 3038 | 3049 | 3053 | 3090 | 3097 | 3100 | 3102 | 3106 | 3130 | 3133 | 3151 |
|              | 3153 | 3158 | 3158 | 3166 | 3167 | 3167 | 3170 | 3176 | 3177 | 3178 | 3180 |
|              | 3183 | 3185 | 3187 | 3188 | 3191 | 3193 | 3194 | 3196 | 3205 | 3211 | 3220 |
| <b>TS-5</b>  | -365 | 13   | 22   | 24   | 29   | 34   | 39   | 44   | 47   | 55   | 57   |
|              | 60   | 63   | 68   | 80   | 86   | 88   | 93   | 108  | 116  | 124  | 132  |
|              | 138  | 140  | 159  | 162  | 163  | 177  | 190  | 194  | 195  | 204  | 210  |
|              | 230  | 242  | 251  | 271  | 273  | 278  | 280  | 291  | 305  | 313  | 330  |
|              | 344  | 355  | 371  | 379  | 392  | 394  | 403  | 418  | 420  | 438  | 440  |
|              | 445  | 447  | 456  | 485  | 494  | 514  | 517  | 523  | 529  | 541  | 557  |

|              |      |      |      |      |      |      |      |      |      |      |      |
|--------------|------|------|------|------|------|------|------|------|------|------|------|
|              | 563  | 577  | 593  | 599  | 609  | 623  | 632  | 635  | 638  | 639  | 651  |
|              | 672  | 676  | 680  | 692  | 696  | 707  | 713  | 724  | 734  | 738  | 771  |
|              | 772  | 778  | 781  | 785  | 812  | 818  | 853  | 859  | 862  | 878  | 884  |
|              | 887  | 890  | 890  | 900  | 921  | 922  | 939  | 942  | 948  | 972  | 974  |
|              | 976  | 983  | 994  | 997  | 1003 | 1005 | 1006 | 1006 | 1007 | 1010 | 1014 |
|              | 1018 | 1021 | 1024 | 1024 | 1048 | 1051 | 1052 | 1059 | 1061 | 1069 | 1075 |
|              | 1102 | 1106 | 1114 | 1121 | 1136 | 1144 | 1165 | 1167 | 1173 | 1180 | 1181 |
|              | 1182 | 1186 |      |      |      |      |      |      |      |      |      |
|              | 1195 | 1197 | 1203 | 1228 | 1236 | 1248 | 1250 | 1258 | 1275 | 1284 | 1287 |
|              | 1312 |      |      |      |      |      |      |      |      |      |      |
|              | 1316 | 1320 | 1323 | 1337 | 1351 | 1355 | 1356 | 1362 | 1372 | 1388 | 1402 |
|              | 1410 |      |      |      |      |      |      |      |      |      |      |
|              | 1419 | 1422 | 1423 | 1430 | 1446 | 1455 | 1468 | 1475 | 1477 | 1478 | 1480 |
|              | 1489 |      |      |      |      |      |      |      |      |      |      |
|              | 1490 | 1492 | 1494 | 1500 | 1505 | 1507 | 1508 | 1514 | 1520 | 1528 | 1540 |
|              | 1567 |      |      |      |      |      |      |      |      |      |      |
|              | 1585 | 1592 | 1609 | 1613 | 1617 | 1623 | 1634 | 1636 | 1640 | 1660 | 1726 |
|              | 1811 |      |      |      |      |      |      |      |      |      |      |
|              | 2897 | 3023 | 3030 | 3037 | 3048 | 3053 | 3085 | 3093 | 3094 | 3098 | 3106 |
|              | 3106 |      |      |      |      |      |      |      |      |      |      |
|              | 3131 | 3151 | 3156 | 3158 | 3159 | 3165 | 3165 | 3168 | 3173 | 3177 | 3177 |
|              | 3180 |      |      |      |      |      |      |      |      |      |      |
|              | 3181 | 3185 | 3186 | 3187 | 3189 | 3191 | 3194 | 3202 | 3205 | 3208 | 3214 |
|              | 3215 |      |      |      |      |      |      |      |      |      |      |
| <b>INT-6</b> | 19   | 23   | 26   | 35   | 40   | 40   | 45   | 54   | 57   | 65   | 67   |
|              | 69   | 76   | 85   | 89   | 96   | 101  | 107  | 114  | 117  | 123  | 125  |
|              | 135  | 140  | 149  | 156  | 165  | 181  | 187  | 193  | 202  | 208  | 220  |
|              | 233  | 240  | 248  | 255  | 266  | 277  | 281  | 301  | 306  | 324  | 331  |
|              | 337  | 351  | 379  | 397  | 404  | 415  | 417  | 443  | 446  | 450  | 453  |
|              | 459  | 465  | 484  | 496  | 511  | 515  | 525  | 533  | 553  | 555  | 566  |
|              | 592  | 602  | 608  | 609  | 621  | 634  | 637  | 641  | 644  | 660  | 680  |
|              | 682  | 692  | 692  | 698  | 710  | 715  | 728  | 731  | 742  | 758  | 773  |
|              | 773  | 788  | 809  | 817  | 819  | 848  | 853  | 856  | 872  | 881  | 884  |
|              | 888  | 891  | 897  | 918  | 922  | 931  | 934  | 940  | 956  | 970  | 974  |
|              | 978  | 984  | 986  | 990  | 991  | 999  | 1000 | 1004 | 1006 | 1007 | 1009 |
|              | 1015 |      |      |      |      |      |      |      |      |      |      |
|              | 1021 | 1021 | 1023 | 1027 | 1050 | 1052 | 1053 | 1055 | 1058 | 1069 | 1083 |
|              | 1101 |      |      |      |      |      |      |      |      |      |      |
|              | 1108 | 1112 | 1123 | 1135 | 1136 | 1161 | 1168 | 1173 | 1178 | 1179 | 1181 |
|              | 1189 | 1191 |      |      |      |      |      |      |      |      |      |
|              | 1199 | 1207 | 1223 | 1226 | 1239 | 1243 | 1244 | 1255 | 1275 | 1277 | 1299 |
|              | 1308 |      |      |      |      |      |      |      |      |      |      |
|              | 1316 | 1319 | 1330 | 1335 | 1345 | 1353 | 1363 | 1365 | 1373 | 1384 | 1402 |
|              | 1412 |      |      |      |      |      |      |      |      |      |      |
|              | 1419 | 1420 | 1421 | 1425 | 1435 | 1460 | 1468 | 1474 | 1474 | 1479 | 1480 |
|              | 1486 |      |      |      |      |      |      |      |      |      |      |
|              | 1488 | 1493 | 1497 | 1500 | 1504 | 1505 | 1506 | 1512 | 1522 | 1532 | 1548 |
|              | 1566 |      |      |      |      |      |      |      |      |      |      |
|              | 1578 | 1600 | 1611 | 1613 | 1630 | 1635 | 1639 | 1641 | 1644 | 1665 | 1669 |
|              | 1733 |      |      |      |      |      |      |      |      |      |      |
|              | 3025 | 3033 | 3035 | 3048 | 3074 | 3079 | 3087 | 3094 | 3096 | 3101 | 3105 |
|              | 3111 |      |      |      |      |      |      |      |      |      |      |
|              | 3129 | 3153 | 3153 | 3153 | 3160 | 3161 | 3161 | 3165 | 3168 | 3173 | 3175 |
|              | 3177 |      |      |      |      |      |      |      |      |      |      |
|              | 3178 | 3180 | 3184 | 3185 | 3187 | 3193 | 3197 | 3198 | 3203 | 3209 | 3209 |
|              | 3216 |      |      |      |      |      |      |      |      |      |      |
| <b>TS-6</b>  | -216 | 15   | 23   | 27   | 32   | 36   | 40   | 41   | 43   | 49   | 56   |
|              | 62   | 62   | 69   | 79   | 85   | 88   | 92   | 100  | 105  | 115  | 120  |
|              | 126  | 136  | 144  | 163  | 174  | 185  | 189  | 191  | 204  | 213  | 218  |
|              | 231  | 234  | 252  | 254  | 259  | 282  | 286  | 298  | 306  | 319  | 326  |
|              | 329  | 345  | 360  | 383  | 399  | 416  | 420  | 422  | 426  | 433  | 446  |

|              |      |      |      |      |      |      |      |      |      |      |      |
|--------------|------|------|------|------|------|------|------|------|------|------|------|
|              | 455  | 460  | 466  | 482  | 498  | 507  | 515  | 536  | 538  | 553  | 564  |
|              | 585  | 591  | 603  | 614  | 619  | 626  | 635  | 636  | 641  | 657  | 670  |
|              | 678  | 682  | 693  | 702  | 712  | 720  | 721  | 734  | 749  | 759  | 769  |
|              | 773  | 782  | 796  | 812  | 817  | 856  | 860  | 867  | 879  | 882  | 883  |
|              | 886  | 889  | 900  | 908  | 921  | 938  | 943  | 948  | 950  | 957  | 964  |
|              | 968  | 969  | 982  | 994  | 998  | 1000 | 1001 | 1005 | 1007 | 1010 | 1013 |
|              | 1020 | 1023 | 1026 | 1027 | 1049 | 1053 | 1054 | 1055 | 1057 | 1069 | 1070 |
|              | 1107 | 1118 | 1121 | 1127 | 1135 | 1146 | 1154 | 1172 | 1172 | 1180 | 1180 |
|              | 1181 | 1181 | 1181 | 1181 | 1181 | 1181 | 1181 | 1181 | 1181 | 1181 | 1181 |
|              | 1198 | 1207 | 1221 | 1229 | 1239 | 1241 | 1247 | 1260 | 1276 | 1299 | 1304 |
|              | 1308 | 1319 | 1326 | 1331 | 1340 | 1342 | 1354 | 1357 | 1365 | 1365 | 1385 |
|              | 1397 | 1403 | 1415 | 1419 | 1421 | 1425 | 1438 | 1449 | 1466 | 1471 | 1474 |
|              | 1479 | 1481 | 1483 | 1484 | 1486 | 1488 | 1492 | 1497 | 1501 | 1506 | 1507 |
|              | 1514 | 1521 | 1527 | 1531 | 1534 | 1565 | 1596 | 1608 | 1609 | 1617 | 1626 |
|              | 1629 | 1635 | 1641 | 1654 | 1736 | 3025 | 3028 | 3034 | 3040 | 3049 | 3090 |
|              | 3094 | 3099 | 3101 | 3106 | 3118 | 3127 | 3135 | 3154 | 3155 | 3157 | 3160 |
|              | 3164 | 3165 | 3166 | 3167 | 3177 | 3178 | 3179 | 3179 | 3181 | 3187 | 3189 |
|              | 3189 | 3189 | 3191 | 3193 | 3197 | 3208 | 3215 | 3220 |      |      |      |
| <b>INT-7</b> | 21   | 24   | 26   | 35   | 41   | 47   | 58   | 58   | 65   | 78   | 91   |
|              | 101  | 110  | 120  | 126  | 133  | 150  | 175  | 177  | 190  | 195  | 206  |
|              | 213  | 222  | 228  | 236  | 244  | 252  | 253  | 264  | 266  | 271  | 288  |
|              | 307  | 310  | 314  | 333  | 339  | 363  | 386  | 403  | 417  | 422  | 423  |
|              | 430  | 440  | 444  | 454  | 483  | 494  | 501  | 515  | 523  | 528  | 536  |
|              | 557  | 563  | 581  | 597  | 612  | 632  | 635  | 637  | 641  | 660  | 669  |
|              | 680  | 693  | 694  | 704  | 720  | 724  | 727  | 734  | 742  | 762  | 767  |
|              | 772  | 785  | 802  | 809  | 819  | 864  | 864  | 870  | 873  | 874  | 878  |
|              | 883  | 900  | 902  | 921  | 936  | 941  | 945  | 952  | 963  | 963  | 968  |
|              | 971  | 982  | 995  | 999  | 1002 | 1004 | 1004 | 1006 | 1011 | 1013 | 1019 |
|              | 1025 | 1027 | 1029 | 1053 | 1055 | 1057 | 1059 | 1064 | 1074 | 1083 | 1098 |
|              | 1109 | 1112 | 1128 | 1132 | 1135 | 1143 | 1169 | 1173 | 1178 | 1181 | 1182 |
|              | 1187 | 1197 | 1205 | 1218 | 1224 | 1227 | 1236 | 1242 | 1249 | 1283 | 1299 |
|              | 1311 | 1313 | 1315 | 1328 | 1337 | 1342 | 1350 | 1352 | 1358 | 1361 | 1367 |
|              | 1380 | 1395 | 1402 | 1417 | 1419 | 1426 | 1471 | 1477 | 1478 | 1483 | 1487 |
|              | 1488 | 1492 | 1492 | 1494 | 1502 | 1503 | 1506 | 1511 | 1523 | 1530 | 1537 |
|              | 1538 | 1569 | 1604 | 1605 | 1616 | 1618 | 1628 | 1632 | 1641 | 1642 | 1652 |
|              | 3021 | 3025 | 3032 | 3034 | 3086 | 3092 | 3095 | 3101 | 3115 | 3142 | 3153 |
|              | 3155 | 3159 | 3160 | 3162 | 3164 | 3171 | 3173 | 3178 | 3179 | 3179 | 3182 |
|              | 3186 | 3187 | 3187 | 3187 | 3193 | 3203 | 3205 | 3215 | 3231 | 3259 |      |
| <b>TS-7</b>  | -250 | 26   | 31   | 38   | 44   | 53   | 57   | 62   | 67   | 76   | 82   |
|              | 93   | 100  | 112  | 120  | 133  | 141  | 160  | 169  | 177  | 182  | 194  |
|              | 202  | 209  | 223  | 230  | 237  | 249  | 260  | 263  | 264  | 279  | 283  |
|              | 297  | 305  | 316  | 320  | 331  | 356  | 363  | 377  | 400  | 405  | 422  |
|              | 426  | 430  | 437  | 445  | 455  | 457  | 491  | 497  | 510  | 524  | 531  |
|              | 535  | 554  | 586  | 595  | 611  | 634  | 635  | 641  | 643  | 645  | 671  |

|              |      |      |      |      |      |      |      |      |      |      |      |
|--------------|------|------|------|------|------|------|------|------|------|------|------|
|              | 676  | 685  | 688  | 698  | 710  | 721  | 727  | 732  | 748  | 763  | 765  |
|              | 774  | 786  | 799  | 805  | 820  | 842  | 859  | 864  | 866  | 870  | 871  |
|              | 880  | 886  | 901  | 916  | 930  | 940  | 942  | 946  | 952  | 960  | 965  |
|              | 971  | 978  | 986  | 990  | 994  | 998  | 1000 | 1005 | 1008 | 1009 | 1010 |
|              | 1024 | 1027 | 1053 | 1054 | 1056 | 1057 | 1058 | 1064 | 1071 | 1099 | 1103 |
|              | 1120 | 1133 | 1134 | 1141 | 1172 | 1176 | 1178 | 1179 | 1180 | 1183 | 1195 |
|              | 1199 | 1208 | 1214 | 1225 | 1239 | 1240 | 1253 | 1273 | 1295 | 1306 | 1312 |
|              | 1317 | 1330 | 1335 | 1339 | 1346 | 1353 | 1355 | 1359 | 1372 | 1373 | 1401 |
|              | 1408 | 1416 | 1419 | 1428 | 1476 | 1477 | 1480 | 1489 | 1490 | 1491 | 1493 |
|              | 1496 | 1502 | 1504 | 1508 | 1509 | 1513 | 1524 | 1530 | 1535 | 1573 | 1602 |
|              | 1611 | 1617 | 1618 | 1635 | 1640 | 1641 | 1643 | 1653 | 1710 | 3019 | 3023 |
|              | 3027 | 3035 | 3082 | 3089 | 3095 | 3100 | 3136 | 3140 | 3152 | 3153 | 3156 |
|              | 3159 | 3161 | 3164 | 3167 | 3172 | 3177 | 3178 | 3179 | 3180 | 3181 | 3181 |
|              | 3192 | 3193 | 3193 | 3198 | 3203 | 3205 | 3218 | 3251 |      |      |      |
| <b>INT-8</b> | 20   | 23   | 28   | 39   | 53   | 53   | 61   | 67   | 71   | 81   | 91   |
|              | 105  | 110  | 117  | 123  | 136  | 161  | 167  | 176  | 187  | 191  | 200  |
|              | 217  | 221  | 231  | 241  | 251  | 258  | 261  | 280  | 282  | 294  | 295  |
|              | 309  | 317  | 327  | 345  | 356  | 365  | 390  | 402  | 411  | 421  | 422  |
|              | 425  | 428  | 434  | 444  | 446  | 472  | 502  | 509  | 525  | 530  | 538  |
|              | 564  | 569  | 584  | 603  | 618  | 632  | 635  | 639  | 641  | 651  | 678  |
|              | 683  | 687  | 698  | 704  | 710  | 720  | 724  | 734  | 741  | 764  | 770  |
|              | 776  | 790  | 796  | 812  | 820  | 855  | 864  | 868  | 870  | 872  | 880  |
|              | 892  | 895  | 902  | 917  | 942  | 943  | 947  | 953  | 955  | 964  | 971  |
|              | 975  | 977  | 997  | 998  | 998  | 1002 | 1004 | 1004 | 1010 | 1012 | 1025 |
|              | 1027 | 1029 | 1040 | 1053 | 1056 | 1058 | 1058 | 1064 | 1078 | 1096 | 1100 |
|              | 1109 | 1110 | 1110 | 1130 | 1137 | 1138 | 1154 | 1169 | 1173 | 1180 | 1181 |
|              | 1182 | 1183 | 1188 | 1199 | 1204 | 1213 | 1223 | 1233 | 1241 | 1249 | 1266 |
|              | 1298 | 1312 | 1315 | 1317 | 1323 | 1334 | 1352 | 1353 | 1360 | 1363 | 1370 |
|              | 1386 | 1402 | 1402 | 1415 | 1419 | 1427 | 1430 | 1478 | 1480 | 1483 | 1485 |
|              | 1491 | 1492 | 1494 | 1496 | 1505 | 1507 | 1509 | 1515 | 1524 | 1531 | 1536 |
|              | 1538 | 1574 | 1612 | 1615 | 1618 | 1628 | 1640 | 1641 | 1643 | 1648 | 1667 |
|              | 3022 | 3026 | 3033 | 3035 | 3085 | 3092 | 3097 | 3103 | 3126 | 3143 | 3155 |
|              | 3155 | 3157 | 3163 | 3163 | 3164 | 3168 | 3172 | 3177 | 3178 | 3180 | 3180 |
|              | 3180 | 3180 | 3187 | 3190 | 3191 | 3193 | 3209 | 3211 | 3215 | 3225 | 3238 |
| <b>TS-8</b>  | -267 | 6    | 23   | 35   | 41   | 50   | 53   | 57   | 62   | 69   | 75   |
|              | 82   | 108  | 112  | 122  | 128  | 135  | 154  | 171  | 177  | 187  | 197  |
|              | 206  | 210  | 218  | 231  | 242  | 246  | 249  | 251  | 262  | 269  | 273  |
|              | 289  | 296  | 311  | 327  | 333  | 341  | 353  | 365  | 378  | 395  | 402  |
|              | 415  | 420  | 422  | 428  | 442  | 448  | 458  | 486  | 499  | 518  | 524  |
|              | 543  | 560  | 567  | 593  | 612  | 616  | 620  | 630  | 637  | 641  | 649  |
|              | 677  | 682  | 683  | 692  | 701  | 717  | 721  | 726  | 755  | 763  | 766  |
|              | 777  | 785  | 791  | 799  | 821  | 829  | 849  | 863  | 864  | 875  | 881  |
|              | 889  | 890  | 899  | 906  | 923  | 940  | 944  | 947  | 952  | 956  | 964  |

|              |                                                                                                                                                                                                                                                                                                                                                                                                                                                                                                                                                                                                                                                                                                                                                                                                                                                                                                                                                                                                                                                                         |
|--------------|-------------------------------------------------------------------------------------------------------------------------------------------------------------------------------------------------------------------------------------------------------------------------------------------------------------------------------------------------------------------------------------------------------------------------------------------------------------------------------------------------------------------------------------------------------------------------------------------------------------------------------------------------------------------------------------------------------------------------------------------------------------------------------------------------------------------------------------------------------------------------------------------------------------------------------------------------------------------------------------------------------------------------------------------------------------------------|
|              | 971 980 983 990 999 1002 1003 1007 1008 1010 1013 1023<br>1027 1033 1040 1052 1054 1055 1060 1061 1080 1100 1102 1109 1111<br>1129 1132 1134 1153 1167 1176 1179 1180 1181 1190 1195 1198 1211<br>1224 1234 1238 1242 1258 1300 1316 1319 1320 1322 1334 1337<br>1350 1354 1361 1363 1381 1387 1389 1402 1414 1417 1427 1478<br>1480 1486 1488 1490 1492 1493 1495 1501 1503 1509 1512 1524<br>1533 1536 1559 1574 1613 1617 1619 1626 1640 1641 1644 1647<br>1651 1690 3015 3023 3029 3033 3085 3088 3090 3093 3117 3122<br>3154 3154 3156 3162 3163 3168 3171 3171 3177 3179 3180 3182<br>3184 3190 3190 3196 3200 3200 3207 3211 3234 3236                                                                                                                                                                                                                                                                                                                                                                                                                           |
| <b>TS-8a</b> | -133 20 23 32 47 56 60 63 68 75 78<br>89 94 103 108 112 123 131 144 149 160 173<br>182 202 208 218 228 235 243 252 257 265 269<br>275 283 305 317 319 336 350 364 394 401 417<br>418 422 430 445 451 459 469 499 519 523 525<br>536 573 577 589 601 617 620 636 639 646 647<br>657 663 685 687 696 707 709 718 720 745 759<br>765 773 776 794 801 819 834 846 860 863 864<br>869 884 888 894 899 905 932 940 942 943 956<br>967 973 978 981 995 997 999 1000 1004 1008 1010 1023<br>1026 1037 1038 1049 1053 1062 1066 1071 1080 1091 1104 1108<br>1112 1125 1138 1145 1163 1166 1177 1181 1181 1186 1190 1191 1204<br>1208 1218 1226 1240 1241 1247 1296 1310 1315 1321 1323 1338<br>1341 1356 1358 1361 1366 1379 1383 1403 1410 1419 1429 1464<br>1471 1476 1479 1483 1487 1490 1494 1497 1502 1504 1507 1512<br>1520 1534 1556 1576 1596 1605 1609 1610 1616 1619 1636 1643<br>1644 1648 1806 3024 3027 3029 3038 3084 3089 3094 3097 3117<br>3126 3157 3157 3160 3162 3165 3166 3174 3175 3175 3177 3179<br>3184 3185 3188 3190 3195 3195 3199 3205 3212 3213 3216 |
| <b>INT-9</b> | 29 40 44 46 57 59 60 66 75 79 89<br>103 115 122 130 137 156 158 171 174 191 202<br>210 213 224 237 241 254 256 270 274 279 286<br>290 303 311 324 333 353 357 386 394 412 414<br>415 419 427 431 439 443 477 502 502 519 530<br>546 553 568 591 605 609 628 634 637 641 656<br>662 682 693 699 715 720 722 724 739 760 765<br>770 780 784 796 807 818 858 860 863 865 873<br>875 887 896 900 915 939 943 948 949 953 957<br>972 975 980 980 986 1001 1002 1004 1005 1009 1014 1024<br>1025 1028 1045 1053 1056 1057 1073 1084 1086 1103 1109 1113<br>1123 1132 1141 1142 1166 1179 1180 1181 1181 1189 1193 1198 1206                                                                                                                                                                                                                                                                                                                                                                                                                                                   |

|               |                                                                                                                                                                                                                                                                                                                                                                                                                                                                                                                                                                                                                                                                                                                                                                                                                                                                                                                                                                                                                                                                       |
|---------------|-----------------------------------------------------------------------------------------------------------------------------------------------------------------------------------------------------------------------------------------------------------------------------------------------------------------------------------------------------------------------------------------------------------------------------------------------------------------------------------------------------------------------------------------------------------------------------------------------------------------------------------------------------------------------------------------------------------------------------------------------------------------------------------------------------------------------------------------------------------------------------------------------------------------------------------------------------------------------------------------------------------------------------------------------------------------------|
|               | 1214 1227 1227 1244 1249 1303 1306 1311 1323 1323 1330 1341<br>1341 1358 1362 1369 1376 1394 1399 1403 1413 1420 1422 1428<br>1470 1478 1482 1484 1487 1490 1491 1493 1494 1504 1507 1513<br>1525 1536 1538 1551 1588 1600 1612 1618 1629 1638 1642 1643<br>1644 1692 1718 3025 3030 3033 3062 3087 3095 3097 3099 3115<br>3141 3156 3158 3158 3163 3166 3166 3169 3178 3179 3179 3182<br>3184 3186 3187 3190 3195 3201 3203 3216 3222 3225 3229                                                                                                                                                                                                                                                                                                                                                                                                                                                                                                                                                                                                                      |
| <b>TS-9</b>   | -36 26 36 40 44 57 60 66 71 85 90<br>91 95 106 113 121 126 130 141 152 160 173<br>185 198 216 226 228 237 256 259 267 273 277<br>285 295 310 320 326 346 359 371 377 408 413<br>422 425 432 434 451 460 463 491 502 505 526<br>532 537 568 573 604 609 636 637 640 645 665<br>672 675 677 690 699 710 718 719 729 745 763<br>771 780 794 809 813 829 839 857 860 863 864<br>873 890 894 898 906 922 939 940 943 958 962<br>965 973 985 993 993 997 997 998 1003 1008 1009 1014<br>1025 1025 1027 1046 1053 1054 1059 1063 1076 1084 1106 1109<br>1112 1132 1133 1140 1164 1174 1178 1180 1181 1185 1193 1204 1206<br>1215 1218 1237 1239 1240 1256 1304 1310 1315 1318 1326 1332<br>1349 1356 1357 1359 1370 1376 1393 1400 1412 1418 1427 1475<br>1476 1480 1481 1481 1486 1489 1494 1495 1499 1500 1506 1517<br>1524 1533 1542 1583 1592 1597 1612 1614 1621 1630 1638 1641<br>1644 1661 1720 3025 3028 3030 3036 3084 3086 3093 3102 3125<br>3126 3156 3156 3157 3158 3164 3166 3168 3171 3177 3179 3179<br>3180 3183 3190 3190 3191 3194 3195 3196 3205 3208 3226 |
| <b>INT-10</b> | 26 33 34 39 47 55 56 62 69 76 82<br>89 96 99 104 108 118 126 133 148 153 158<br>178 206 210 216 223 231 239 242 260 269 271<br>279 290 307 315 334 360 376 399 407 413 418<br>419 430 445 448 459 502 526 529 538 540 548<br>551 563 572 591 608 621 634 637 644 648 665<br>672 679 685 697 704 712 717 718 742 758 764<br>765 775 779 788 807 843 851 860 861 868 875<br>881 884 889 894 907 939 940 942 957 960 962<br>971 976 982 992 993 996 996 1001 1007 1009 1017 1024<br>1026 1036 1042 1048 1053 1056 1067 1070 1091 1098 1104 1108<br>1124 1131 1135 1140 1170 1178 1180 1181 1186 1194 1200 1204 1204<br>1207 1232 1244 1247 1254 1303 1309 1312 1316 1322 1335 1344<br>1352 1358 1360 1360 1372 1379 1399 1404 1412 1423 1440 1477<br>1478 1480 1481 1486 1488 1492 1494 1496 1503 1506 1509 1526                                                                                                                                                                                                                                                         |

|               |                                                                                                                                                                                                                                                                                                                                                                                                                                                                                                                                                                                                                                                                                                                                                                                                                                                                                                                                                                                                                                                                      |
|---------------|----------------------------------------------------------------------------------------------------------------------------------------------------------------------------------------------------------------------------------------------------------------------------------------------------------------------------------------------------------------------------------------------------------------------------------------------------------------------------------------------------------------------------------------------------------------------------------------------------------------------------------------------------------------------------------------------------------------------------------------------------------------------------------------------------------------------------------------------------------------------------------------------------------------------------------------------------------------------------------------------------------------------------------------------------------------------|
|               | 1531 1536 1583 1601 1609 1611 1615 1618 1624 1626 1639 1645<br>1647 1652 1972 3026 3035 3038 3041 3088 3095 3096 3098 3123<br>3129 3156 3156 3157 3159 3163 3166 3170 3173 3174 3177 3178<br>3180 3181 3181 3182 3186 3189 3190 3191 3195 3196 3206                                                                                                                                                                                                                                                                                                                                                                                                                                                                                                                                                                                                                                                                                                                                                                                                                  |
| <b>TS-10</b>  | -235 23 29 34 39 48 50 54 59 63 70<br>76 80 89 99 107 113 118 125 138 152 162<br>168 196 199 216 222 227 229 236 240 257 262<br>262 282 304 305 313 331 350 356 389 395 415<br>418 420 438 444 447 465 492 509 528 534 538<br>546 555 571 584 597 600 602 621 635 636 637<br>645 660 681 689 691 698 709 712 715 745 759<br>763 766 767 780 805 823 829 849 856 858 860<br>861 871 880 882 898 906 932 937 939 945 948<br>953 960 969 986 987 991 992 994 1007 1008 1012 1024<br>1024 1038 1040 1043 1049 1053 1059 1062 1066 1103 1105 1111 1114<br>1120 1124 1164 1167 1168 1178 1180 1181 1186 1193 1203 1204 1215<br>1222 1232 1242 1246 1266 1305 1311 1312 1319 1327 1341 1351<br>1355 1358 1361 1367 1371 1393 1400 1402 1420 1425 1453 1477<br>1479 1481 1487 1488 1488 1491 1493 1501 1505 1507 1515 1522<br>1536 1550 1574 1578 1586 1592 1615 1619 1620 1629 1644 1645<br>1649 1962 3025 3031 3035 3038 3087 3094 3097 3098 3118 3121<br>3155 3155 3159 3160 3163 3164 3170 3174 3175 3176 3176 3179<br>3181 3184 3184 3185 3186 3195 3195 3196 3197 3202 |
| <b>INT-11</b> | 17 20 28 31 33 44 49 52 61 64 70<br>88 97 99 110 118 124 132 143 160 173 185<br>193 196 200 209 216 232 237 244 261 271 275<br>283 295 298 305 327 356 364 405 409 413 415<br>416 421 438 442 484 496 518 524 528 532 545<br>552 561 565 588 605 614 619 633 636 637 648<br>656 681 683 700 703 708 713 714 722 747 761<br>769 771 779 799 815 819 855 857 859 861 870<br>879 894 899 902 907 917 925 938 939 940 952<br>955 972 973 978 981 992 993 1004 1004 1007 1010 1020<br>1024 1026 1033 1035 1051 1053 1061 1062 1081 1082 1104 1107<br>1107 1124 1128 1135 1164 1166 1173 1181 1182 1187 1188 1200 1203<br>1206 1224 1224 1243 1253 1270 1292 1314 1317 1318 1331 1335<br>1354 1358 1359 1363 1370 1383 1391 1399 1415 1420 1422 1423<br>1461 1478 1480 1482 1486 1488 1493 1495 1502 1510 1512 1528<br>1528 1535 1538 1547 1579 1610 1617 1633 1635 1640 1645 1646<br>1649 1753 1932 3023 3028 3028 3034 3085 3091 3096 3097 3105<br>3130 3155 3156 3157 3163 3165 3165 3167 3174 3175 3175 3178                                                           |



|                            |                                                                                                                                                                                                                                                                                                                                                                                                                                                                                                                |
|----------------------------|----------------------------------------------------------------------------------------------------------------------------------------------------------------------------------------------------------------------------------------------------------------------------------------------------------------------------------------------------------------------------------------------------------------------------------------------------------------------------------------------------------------|
|                            | 3179 3182 3183 3185 3186 3187 3190 3190 3198 3207 3211                                                                                                                                                                                                                                                                                                                                                                                                                                                         |
| <b><sup>3</sup>Pre-CAT</b> | 26 44 72 75 97 105 143 159 169 193 205<br>211 240 266 269 283 324 358 377 388 418 444<br>479 501 521 553 570 640 679 690 805 853 878<br>900 941 959 968 972 1005 1010 1062 1076 1112 1137 1166<br>1172 1183 1226 1242 1309 1338 1347 1393 1404 1420 1422 1429<br>1480 1487 1488 1492 1502 1509 1512 1520 1582 1966 3023 3026<br>3035 3036 3088 3094 3095 3098 3116 3122 3177 3185 3193 3210                                                                                                                    |
| <b><sup>1</sup>Pre-CAT</b> | 34 39 74 93 118 143 153 179 189 197 216<br>235 257 280 300 323 361 393 437 444 477 490<br>494 533 564 578 597 645 692 704 820 879 899<br>910 942 958 973 974 984 1006 1031 1062 1073 1110 1128<br>1177 1186 1222 1243 1311 1337 1360 1389 1402 1418 1423 1425<br>1483 1486 1489 1491 1501 1508 1516 1548 1575 2010 3027 3032<br>3035 3037 3090 3096 3096 3100 3117 3126 3179 3181 3194 3213                                                                                                                    |
| <b>TS-1c</b>               | -183 29 33 35 50 64 75 82 95 102 130<br>137 164 174 185 201 228 241 257 271 283 311<br>333 350 384 387 439 443 458 480 507 528 550<br>569 588 630 637 656 685 701 824 898 900 915<br>932 939 944 966 974 995 1005 1028 1037 1063 1066 1073<br>1104 1129 1170 1185 1213 1221 1244 1310 1334 1364 1368 1386<br>1403 1413 1418 1422 1425 1452 1477 1481 1487 1490 1491 1500<br>1507 1511 1515 1557 1569 1579 2059 2283 3027 3030 3036 3037<br>3041 3090 3096 3098 3100 3102 3120 3129 3135 3180 3181 3197<br>3219 |
| <b>INT-1c</b>              | 33 34 47 56 69 77 93 99 115 132 153<br>158 170 186 204 214 222 238 250 274 276 286<br>320 337 362 398 437 443 475 497 518 524 538<br>547 565 580 638 640 685 687 708 819 883 897<br>899 914 945 946 974 976 999 1006 1031 1035 1063 1063<br>1078 1106 1135 1174 1190 1224 1246 1315 1332 1355 1360 1364<br>1389 1390 1401 1415 1423 1424 1468 1478 1483 1486 1491 1492<br>1503 1512 1519 1559 1580 1626 2043 3027 3028 3035 3035 3045<br>3088 3095 3096 3101 3107 3122 3126 3139 3178 3181 3191 3223<br>3583   |
| <b>TS-2c</b>               | -132 35 43 44 48 57 62 69 78 84 86<br>109 119 127 146 156 161 172 178 188 201 206<br>215 234 241 250 260 281 288 332 346 354 384<br>418 434 449 454 470 502 518 520 560 569 626<br>627 640 659 678 682 694 701 805 872 896 918<br>930 940 947 948 977 995 1004 1007 1015 1028 1033 1035                                                                                                                                                                                                                        |

|               |                                                                                                                                                                                                                                                                                                                                                                                                                                                                                                                                                                                                                              |
|---------------|------------------------------------------------------------------------------------------------------------------------------------------------------------------------------------------------------------------------------------------------------------------------------------------------------------------------------------------------------------------------------------------------------------------------------------------------------------------------------------------------------------------------------------------------------------------------------------------------------------------------------|
|               | 1061 1065 1067 1085 1109 1142 1168 1200 1228 1244 1315 1336<br>1360 1362 1371 1394 1404 1412 1414 1421 1428 1440 1457 1466<br>1475 1477 1477 1485 1487 1490 1494 1501 1507 1514 1519 1540<br>1589 1597 1609 2083 2613 3028 3030 3037 3042 3042 3046 3090<br>3094 3100 3102 3104 3111 3117 3133 3138 3145 3184 3199 3212<br>3218 3390                                                                                                                                                                                                                                                                                         |
| <b>INT-2c</b> | 33 34 45 49 53 60 64 66 71 76 88<br>105 108 113 128 137 144 157 168 184 189 209<br>217 240 244 250 262 273 283 287 322 346 370<br>412 435 448 464 512 520 522 532 562 576 582<br>620 630 639 682 687 688 701 750 810 874 897<br>933 944 945 948 952 975 988 1002 1010 1020 1033 1036<br>1062 1065 1066 1082 1114 1141 1170 1198 1226 1244 1316 1342<br>1355 1362 1370 1391 1395 1403 1413 1417 1425 1434 1461 1467<br>1470 1475 1479 1481 1487 1491 1495 1498 1504 1505 1512 1552<br>1599 1608 1635 2067 3028 3034 3035 3041 3045 3046 3092 3097<br>3102 3103 3107 3110 3117 3143 3145 3147 3181 3207 3218 3242<br>3394 3528 |
| <b>INT-3c</b> | 35 38 40 47 54 56 68 78 90 91 109<br>125 141 147 159 169 186 211 216 240 241 260<br>271 280 282 320 345 369 412 435 449 470 520<br>522 527 535 560 578 619 624 640 678 685 688<br>698 810 855 897 929 936 940 944 974 980 992<br>1008 1021 1030 1032 1060 1061 1065 1081 1115 1142 1171 1203<br>1226 1245 1317 1330 1343 1345 1363 1386 1387 1403 1414 1417<br>1424 1435 1466 1466 1476 1477 1478 1488 1492 1495 1505 1506<br>1512 1552 1601 1641 1656 2057 3027 3034 3034 3044 3045 3045<br>3091 3096 3101 3102 3107 3107 3116 3139 3139 3144 3181 3205<br>3222 3239                                                        |
| <b>TS-3c</b>  | -185 20 32 37 45 48 55 63 65 82 96<br>106 119 139 151 160 175 181 198 218 230 240<br>249 264 267 271 287 321 358 390 400 425 442<br>448 487 515 525 572 620 626 641 662 669 685<br>695 821 898 910 927 934 939 952 973 978 993<br>1013 1026 1027 1030 1059 1061 1067 1080 1110 1137 1170 1185<br>1225 1242 1311 1335 1336 1360 1378 1388 1402 1411 1415 1420<br>1426 1430 1465 1465 1474 1477 1480 1488 1493 1498 1503 1510<br>1512 1527 1562 1589 1645 2194 3024 3028 3035 3038 3043 3046<br>3089 3095 3098 3102 3103 3108 3126 3136 3140 3143 3174 3196<br>3206 3221                                                       |
